# Supplementary material for: Deciphering the microbial landscape of lower respiratory tract in health and respiratory diseases
Source: Research Square preprint supplement (doi:10.21203/rs.3.rs-7937892/v1), 2025-11-20
Supplement: Supplementary file 1 [file 558325d50077551b96a7d45e.xlsx]

## Sheet: Index
	Table	Description
	Table S1	Clinical information of the samples
	Table S2	Quality information of reads after quality control and removal of human reads
	Table S3	Microbial profile of 43 healthy individuals based on Kraken2 analysis
	Table S4	Percentage of classified reads in each sample based on Kraken2 analysis
	Table S5	Results of GTDB-Tk analysis
	Table S6	Results of MaAsLin2 Analysis
	Table S7	Results of different species between the COVID-19 group and the healthy group based on Kraken2 analysis
	Table S8	Results of different species between the NSCLC group and the healthy group based on Kraken2 analysis
	Table S9	Results of different species between the COVID-21 group and the healthy group based on Kraken2 analysis
	Table S10	Results of different metagenome-assembled genomes (MAGs) between the NSCLC group and the healthy group

## Sheet: TableS1
SampleID	Group	Gender	Age	Smoking History	Family Cancer History
H24	Healthy	male	64	Yes	No
H25	Healthy	female	44	No	No
H26	Healthy	female	48	No	No
H27	Healthy	male	55	Yes	No
H28	Healthy	male	35	Yes	No
H30	Healthy	female	63	No	Yes
H31	Healthy	male	38	No	Yes
H32	Healthy	female	59	No	No
H33	Healthy	female	60	No	No
H34	Healthy	male	32	No	Yes
H35	Healthy	female	55	No	No
H36	Healthy	male	33	No	No
H37	Healthy	female	59	No	No
H50	Healthy	female	36	No	No
H51	Healthy	female	43	No	No
H54	Healthy	female	33	No	Yes
H56	Healthy	female	59	No	No
H57	Healthy	male	64	Yes	No
H58	Healthy	female	52	No	Yes
H59	Healthy	male	54	No	Yes
H64	Healthy	female	40	No	No
H65	Healthy	female	40	No	No
H66	Healthy	male	56	No	No
H67	Healthy	male	40	Yes	No
H3	Healthy	female	45	No	No
H4	Healthy	male	65	Yes	No
H5	Healthy	female	36	No	No
H6	Healthy	female	55	No	No
H7	Healthy	female	23	No	No
H8	Healthy	female	64	No	No
H9	Healthy	female	58	No	No
H11	Healthy	female	32	No	No
H12	Healthy	male	64	Yes	No
H13	Healthy	female	50	No	No
H14	Healthy	male	28	Yes	No
H15	Healthy	female	57	No	No
H16	Healthy	male	53	No	Yes
H18	Healthy	female	51	No	No
H20	Healthy	male	52	Yes	No
H22	Healthy	male	66	Yes	No
H40	Healthy	female	63	No	Yes
H41	Healthy	male	32	No	Yes
H44	Healthy	male	41	Yes	No
cov1	COVID-19	male	68	NA	NA
cov2	COVID-19	female	71	NA	NA
cov3	COVID-19	female	44	NA	NA
cov4	COVID-19	male	70	NA	NA
cov5	COVID-19	male	78	NA	NA
cov6	COVID-19	female	49	NA	NA
cov7	COVID-19	male	79	NA	NA
cov8	COVID-19	male	NA	NA	NA
cov9	COVID-19	female	73	NA	NA
cov10	COVID-19	male	52	NA	NA
cov11	COVID-19	male	69	NA	NA
cov12	COVID-19	male	89	NA	NA
cov13	COVID-19	male	88	NA	NA
cov14	COVID-19	female	81	NA	NA
cov15	COVID-19	male	80	NA	NA
cov17	COVID-19	male	52	NA	NA
cov18	COVID-19	female	60	NA	NA
cov19	COVID-19	male	49	NA	NA
cov20	COVID-19	male	58	NA	NA
cov21	COVID-19	male	73	NA	NA
cov22	COVID-19	male	80	NA	NA
cov23	COVID-19	male	59	NA	NA
cov24	COVID-19	female	83	NA	NA
LC1	NSCLC	male	68	NA	NA
LC2	NSCLC	male	66	NA	NA
LC3	NSCLC	male	59	NA	NA
LC4	NSCLC	male	59	NA	NA
LC5	NSCLC	male	64	NA	NA
LC6	NSCLC	male	57	NA	NA
LC7	NSCLC	male	4	NA	NA
LC8	NSCLC	male	80	NA	NA
LC10	NSCLC	male	71	NA	NA
LC11	NSCLC	male	58	NA	NA
LC12	NSCLC	male	64	NA	NA
LC13	NSCLC	male	59	NA	NA
LC14	NSCLC	male	48	NA	NA
LC15	NSCLC	female	68	NA	NA
LC16	NSCLC	male	69	NA	NA
LC18	NSCLC	male	45	NA	NA
LC19	NSCLC	male	36	NA	NA
LC20	NSCLC	male	61	NA	NA
LC21	NSCLC	male	47	NA	NA
LC22	NSCLC	male	67	NA	NA
LC23	NSCLC	male	51	NA	NA
LC27	NSCLC	male	64	NA	NA
LC28	NSCLC	male	51	NA	NA
LC29	NSCLC	male	52	NA	NA
LC30	NSCLC	male	59	NA	NA
LC31	NSCLC	male	74	NA	NA
LC32	NSCLC	male	65	NA	NA
LC33	NSCLC	male	68	NA	NA

## Sheet: TableS2
ID	total_reads		total_bases		q20_rate		q30_rate
H24	11508742		1276023740		1		0.968379
H25	41183812		4673455515		1		0.971636
H26	82549024		8675467716		1		0.970855
H27	141828520		15579141129		1		0.971545
H28	30560754		3441412260		1		0.969409
H30	56817148		6292174677		1		0.97184
H31	11655472		1326786936		1		0.971194
H32	9461466		1074566742		1		0.969599
H33	48885250		5210041042		1		0.96875
H34	20764060		2399740851		1		0.972995
H35	10252284		1157159117		1		0.970251
H36	22236076		2541679367		1		0.971851
H37	10559916		1191410067		1		0.97192
H50	35058588		3821237034		1		0.97166
H51	10702442		1321008628		1		0.97815
H54	43727934		5114872555		1		0.975855
H56	91556814		10355292292		1		0.975382
H57	95239602		10402464128		1		0.974573
H58	35539268		4184872669		1		0.973483
H59	21867944		2525623146		1		0.975582
H64	3565428		390168162		1		0.974392
H65	18662104		2237280491		1		0.977141
H66	76945216		8738077065		1		0.973356
H67	19337342		2334143738		1		0.975882
H3	35777194		3963974496		1		0.966291
H4	54401118		5913901863		1		0.964898
H5	38012516		4124707207		1		0.968378
H6	13546656		1537791826		1		0.966887
H7	36403018		3948504850		1		0.966253
H8	138644826		15998287867		1		0.975698
H9	50521204		5597674075		1		0.966332
H11	12592654		1450023624		1		0.966887
H12	52907374		5707464559		1		0.96424
H13	46299896		4969927177		1		0.964905
H14	40690316		4542746945		1		0.967408
H15	9629220		1107900372		1		0.967537
H16	12228766		1403585326		1		0.96755
H18	29587306		3144865925		1		0.965109
H20	36795182		3991853810		1		0.969748
H22	37152900		4429604264		1		0.975046
H40	127767980		14632015858		1		0.968467
H41	48102276		5453901218		1		0.971774
H44	30177794		3222158235		1		0.966979

## Sheet: TableS3
name1	H24	H25	H26	H27	H28	H30	H31	H32	H33	H34	H35	H36	H37	H50	H51	H54	H56	H57	H58	H59	H64	H65	H66	H67	H11	H12	H13	H14	H15	H16	H18	H20	H22	H3	H40	H41	H44	H4	H5	H6	H7	H8	H9
Staphylococcus_aureus	0.0510887	0.475839	0.00643393	0.0186566	0.00132708	0.382795	0.0165311	0.0366715	0.112143	0.18865	0.115861	0.00710258	0.126367	0.468755	0.254756	0.577353	0.231417	0.635102	0.00565601	0.863892	0.238078	0.0275192	0.00927955	0.00917772	0.234886	0.618156	0.024111	0.054069	0.346315	0.00711097	0.0186248	0.0342547	0.0353698	0.0107571	0.00124968	0.107615	0.501549	0.625138	0.0241501	0.0956764	0.024646	0.39346	0.00672764
Salmonella_enterica	0.23635	0.250072	0.0323367	0.00289748	0.021102	0.346796	0.0978199	0.316311	0.0855421	0.196634	0.126953	0.0249938	0.15539	0.364347	0.260353	0.328262	0.111313	0.0513926	0.0256775	0.0611172	0.0648576	0.322404	0.206435	0.0409199	0.21831	0.107498	0.291757	0.0346757	0.359328	0.0679961	0.169934	0.158531	0.0212879	0.0233255	0.012528	0.0749238	0.00633596	0.136005	0.275384	0.0871641	0.141945	0.387159	0.0258572
Klebsiella_pneumoniae	0.00642365	0.0123426	0.932845	0.000143176	0.000656752	0.00893899	0.00485686	0.0165067	0.0026877	0.004613	0.00442348	0.887469	0.00500359	0.00999833	0.00934948	0.010676	0.00290814	0.00152123	0.000946695	0.00126273	0.0076058	0.0126435	0.00851272	0.00192221	0.00579445	0.00406344	0.0104237	0.00123844	0.0129096	0.00278665	0.00704969	0.00848307	0.00107593	0.950492	0.00142463	0.00294546	0.000556955	0.00624383	0.0102006	0.00224848	0.00540834	0.0136217	0.63145
Xanthobacter_autotrophicus	0.000697408	0.00118835	0.000239384	0.000125803	9.79e-05	0.000625013	0.538328	0.00114423	0.723864	0.000740048	0.000447117	0.000221607	0.000468427	0.00117964	0.000828876	0.000387651	0.000435266	0.000275779	0.186355	0.000555811	0.000486245	0.000718402	0.000217306	0.168775	0.000660498	0.000769623	0.000948399	0.000490237	0.00131206	0.428579	0.000561672	0.651829	0.000181944	0.00028221	8.83e-05	0.000412521	0.000663361	0.000596476	0.00081602	0.00044458	0.632222	0.000341235	0.00012603
Bartonella_krasnovii	0.000730403	0.00104576	0.000237652	0.000120993	0.0729462	0.000458569	0.000381425	0.52813	0.000499006	0.000613392	0.000410354	0.000227187	0.000394534	0.00110786	0.000650381	0.000366202	0.000396112	0.000231321	0.000139186	0.000503124	0.000357268	0.457231	0.252535	0.000115658	0.000637217	0.000767093	0.529892	0.000401854	0.00092581	0.000275501	0.33298	0.000275471	0.000169404	0.000266598	0.0656218	0.000318083	0.00034163	0.000622684	0.569431	0.000365191	0.000564777	0.000286279	0.000119391
Streptomyces_sp._ICC4	0	0	0	0.161134	0	0	0	0	0	0	0	0	0	0	0	0	0	0	0	0	0	0	0	0	0	9.91e-05	0	0	0	0	0	0	0.23517	0	0	0.523861	0	0	0	0.745537	0	0	0
Rothia_mucilaginosa	0.00100237	0.0132185	0.000106929	0.28436	0.301484	0.00347805	0.0190453	0.000246847	0.00271809	0.0627235	0.0363477	0.00794676	0.0122899	9.52e-05	0.00845084	1.29e-05	0.0768191	0.0680931	0.0339152	0.000249536	0.00931605	0.00359985	0.0692155	2.63e-05	0.0415407	0.0117671	3.07e-05	0.0279658	0.0177258	0.0172834	0.0237885	0.0144813	0.00109166	0.000263759	0.110899	0.00677665	0.0189851	0.0124005	0.00166657	0.00111586	0.0454991	0.00122811	0.0579504
Escherichia_coli	0.00954923	0.00970998	0.0030504	0.00155284	0.000556492	0.192348	0.00308628	0.0126311	0.0026675	0.115333	0.0106523	0.00126029	0.00492838	0.0124777	0.00594985	0.00995493	0.00396096	0.00148803	0.0130579	0.00198413	0.00387061	0.0119085	0.00248782	0.000777311	0.171942	0.00620093	0.00601554	0.00335262	0.0070043	0.00156337	0.00468943	0.003629	0.00606585	0.00215312	0.000374844	0.0249473	0.000453901	0.0761495	0.00473558	0.046253	0.00547577	0.00501819	0.00287044
Tropheryma_whipplei	0	0	0.00793169	0	0	0	2.15e-05	0	0.00835289	0	0	1.55e-05	2.9e-05	2.93e-05	0	0	0	0	0.000346096	0	6.06e-05	0	0	0.762783	0.00802514	6.96e-06	0	0	0	0	0	0	0	0	0	0	0	5.4e-06	0	0	0	0.00205359	0
Streptococcus_mitis	0.0105606	0.00629942	0.00141982	0.0332446	0.00310188	0.000104452	0.00276422	0.000109611	0.00545199	0.00626476	0.0213682	0.00277647	0.0391295	0.000134019	0.0124085	4.55e-05	0.0633914	0.00950715	0.0157326	0.000147058	0.00599359	0.00484899	0.0340631	2.15e-05	0.0139394	0.0065663	1.61e-05	0.203432	0.00703018	0.0323147	0.0281109	0.00102865	0.00282652	0.000193502	0.00693349	0.0117715	0.0118841	0.0115452	0.000135663	0.000180831	0.000807832	0.00108145	0.00793132
Burkholderia_dolosa	0.0354653	0.00980084	0.000179369	0.000216129	0.00452009	0.00523165	0.0177021	0.0619444	0.0177178	0.00439475	0.00165036	0.000168597	0.00544959	0.00916632	0.00340988	0.00715628	0.0355533	0.000866446	0.00434137	0.0020785	0.00507526	0.0488952	0.0125962	0.00679906	0.00581514	0.00345129	0.091255	0.00145346	0.00724919	0.0111861	0.0386145	0.0128498	0.000442811	0.000207932	0.00364956	0.00184719	0.00106594	0.00369146	0.0571873	0.00156926	0.0555404	0.00741764	0.000149329
Schaalia_odontolytica	0.00898131	0.00131393	0.00051913	0.039428	0.181094	0.000531884	0.0137869	0.000103373	6.75e-05	0.0140698	0.00494909	0.00265131	0.0132248	2.52e-05	0.0118156	3.14e-06	0.0118741	0.00524807	0.0162444	0.000419174	0.00219391	0.00147692	0.0103872	1.17e-05	0.00315073	0.00167205	7.94e-06	0.024332	0.00348821	0.0173599	0.0170427	0.00261143	0.00155341	0.000251931	0.125981	0.0148044	0.0251673	0.00629335	0.000767627	0.000328142	0.00283493	0.00207563	0.00769532
Streptococcus_salivarius	0.0233094	0.00192239	8.92e-05	0.0260656	0.0147915	0.00074744	0.000412592	0	0.000444	0.0110939	0.00134533	0.00182786	0.0126007	4.46e-05	0.0177777	3.38e-05	0.0545456	0.00717276	0.0121056	0.000112899	0.00485729	0.00934062	0.0019993	2.02e-05	0.0090452	0.0415584	1.38e-05	0.0707046	0.00315572	0.0336856	0.0225941	0.00359051	0.00127066	0.000140514	0.0729138	0.0192965	0.0316176	0.00531494	0.000409029	0.000254928	0.0106706	0.000335051	0.0011222
Aeromonas_hydrophila	0.0248257	0.0257786	0.00327088	0.000318857	0.00138018	0.0202144	0	0	0.00636324	0.00962219	0.00792093	0.00206382	0.0106504	0.0214977	0.0197576	0.0248079	0.00683122	0.00394183	0.00207729	0.00398736	0.0109025	0.02364	0.033274	0	0.0210566	0.0088728	0.0182516	0.00252106	0.0225758	0.00565569	0.0120034	0.0379584	0.00152808	0.0032136	0.00158032	0.0073871	0.00107725	0.00886904	0.0238247	0.00383009	0.00799488	0.0705685	0.00242065
Parvimonas_micra	0.0145196	0.00387201	0.000359265	0.0153211	0.0122852	0.00169784	0.0215891	0	0.000365746	0.0782451	0.032566	0.00209969	0.0281109	0.000300691	0.0939995	0.000112302	0.00917227	0.00346856	0.0673486	8.74e-05	0.00117369	0.000427906	0.00213146	3.41e-05	0.0218577	0.00162557	1.27e-05	0.023849	0.0175625	0.000394138	0.00529647	0.00102452	0.00371853	9.7e-06	0.00885231	0.00438095	0.00257008	0.00853122	0.000189766	0.000160543	0.00602074	0.000201971	0.00529737
Streptomyces_sp._ICC1	0	7.96e-05	1.11e-05	4.65e-06	0	5.05e-05	0.0636838	0	1.41e-05	4.61e-05	0.363707	1.71e-05	5.67e-05	8.44e-05	0	6.03e-05	5.78e-05	1.95e-05	0	0	0	1.89e-05	2.29e-05	0	0	0.000480461	1.22e-05	4.06e-05	0	0	3.97e-05	1.45e-05	9.34e-06	1.94e-05	1.73e-05	1.38e-05	0.000119183	0.000445414	9.11e-06	0	2.23e-05	2.61e-05	0.0395419
Streptococcus_cristatus	0.0109101	0.00563923	0.000144881	0.00780651	0.000696016	0.00118181	0.00690572	0	0.00113234	0.00874345	0.0163208	0.000180953	0.120575	4.63e-05	0.0144992	5.93e-05	0.0133703	0.00692469	0.00950563	0.000109425	0.00138393	0.000219486	0.00380266	1.69e-05	0.00761987	0.000500698	1.73e-05	0.0250619	0.0421014	0.00243338	0.036748	0.00176849	0.00105773	1.04e-05	0.0514657	0.000943139	0.00146015	0.000492037	1.22e-05	0.000126141	0.000531062	6.23e-05	0.00216738
Streptococcus_pneumoniae	0.0030201	0.00604964	0.000497895	0.0128173	0.00100025	0.000269763	0.00128527	0.000486565	0.00133975	0.00311145	0.0118864	0.0048901	0.0236496	3.23e-05	0.00729165	0	0.018095	0.00449798	0.00679553	3.18e-05	0.00272014	0.00194586	0.0142894	0	0.00548489	0.000671128	3.97e-06	0.102905	0.00695054	0.00800338	0.0123923	0.000625865	0.0734609	7.88e-05	0.003349	0.00681245	0.00196516	0.000798637	3.91e-05	5.91e-05	0.000410868	0.000802225	0.00256647
Haemophilus_influenzae	6.05e-05	1.57e-05	0.000310168	0.000306076	0.000214102	3.88e-05	0.000244142	0	7.37e-05	7.43e-05	6.06e-05	0.000445605	0.000727052	0	0.0267805	7.5e-06	9.54e-05	0.000663954	0.0194156	1.56e-05	0	0.000399317	0.000498659	0	0.000503565	9.17e-06	2.11e-05	0.00134065	0.000195117	0.000529253	0.000959332	4.58e-05	0.283958	0	0.00025761	0.000120979	1.05e-05	5.53e-05	9.38e-06	2.47e-05	8.42e-05	2.68e-05	0.00031592
Fusobacterium_nucleatum	0.202954	0.000114684	2.19e-05	0.00127778	0.00513746	0.000219802	0.00598258	0	0.00029752	0.00173498	0.00148443	0.000382232	0.00373488	3.47e-05	0.00377303	0	0.00021334	0.000520507	0.0391364	1.51e-05	6.71e-05	0.000171531	0.00527445	1.81e-05	0.00162538	3.84e-05	6.66e-06	0.00368711	0.000469873	0.000156205	0.00422404	0.00012337	9.76e-05	7.81e-06	0.0018957	0.00409249	0.00062482	0.00027249	7.16e-05	0	0.00118917	1.57e-05	0.000628581
Corynebacterium_accolens	0.00313408	0.000974299	1.02e-05	0.000410425	0.00011199	1.61e-05	0.00622746	0	3.71e-05	0.00699591	0.00224751	0.000266646	0.00783263	0	0.000793998	3.57e-05	1.84e-05	0.00778537	0.00818466	3.24e-05	0.000107051	0.0102573	0.03596	0.00251973	0.00192545	0.0240409	7.46e-05	0.00528392	0.0081312	0.0127996	0	8.56e-05	0.0589728	0	0.0226709	0.000161511	0.0375558	5.79e-05	0	3.44e-05	0	0.000280356	0
Streptococcus_oralis	0.00519681	0.001968	0.000847371	0.0128664	0.00286235	6.4e-05	0.004235	0	0.00217867	0.00451251	0.00634112	0.00214672	0.0183175	3.37e-05	0.016241	5.82e-05	0.0330626	0.00319404	0.0104306	0.0001349	0.00373261	0.00226126	0.00746388	5.95e-06	0.00635061	0.00358978	6.66e-06	0.036437	0.00733082	0.00866116	0.0109895	0.00116535	0.00101446	0.000157546	0.0211044	0.00252409	0.00746265	0.00298514	0.000754849	0.000234639	0.000956026	0.000497569	0.00698706
Streptococcus_parasanguinis	0.00445191	0.000564569	1.69e-05	0.0234459	0.0221179	0.000486593	0.000380683	3.12e-05	0.000134021	0.00663583	0.00196434	0.000780806	0.00827005	0	0.0074722	0	0.0648667	0.000507169	0.000423166	0.00015169	0.0076948	0.000349518	0.000282655	7.33e-06	0.000668258	0.0214674	5.89e-06	0.00936336	0.00143351	0.00961157	0.00809563	0.0010433	0.000466169	0.000284103	0.00210339	0.0125318	0.0210304	0.0136254	7.44e-05	0.000115555	0.000381153	0.000187601	0.000210775
Aeromonas_caviae	0	0.0842593	0	0	0	0	0	0	0	0	0	0	0	0.0849701	0	0	0	0	0	0.0148048	0	0	0	0	0.0678407	0	0	0	0	0	0	0	0	0	0	0	0	0	0	0	0	0	0
Corynebacterium_segmentosum	0.00294861	0.0007759	1e-05	0.000397726	0.00010347	1.81e-05	0.00544235	0	3.02e-05	0.00625586	0.00197328	0.000261066	0.00705346	1.43e-05	0.000912995	3.14e-05	2.42e-05	0.00675679	0.00750857	3.71e-05	9.54e-05	0.00843961	0.0301743	0.00231888	0.00164607	0.0200973	6.26e-05	0.00514866	0.00775092	0.0107136	0	0.000121117	0.057561	0	0.0215445	0.000182291	0.0327759	6.86e-05	0	3.09e-05	0	0.000257886	0
Gemella_haemolysans	0.00413895	0.00083171	0.000316945	0.00498003	0.000272504	3.98e-05	0.00124074	0	0.00263194	0.00245618	0.00387303	0.0114873	0.0544378	3.98e-05	0.000888375	0	0.0185616	0.00267707	0.0108387	9.5e-05	0.00187791	0.000334763	0.00150097	1.63e-05	0.00714476	0.00471149	5.38e-06	0.0335184	0.00196909	0.00844893	0.0129575	5.28e-05	0.014066	1.09e-05	0.00165135	0.000626496	0.0216902	0.000613597	3.34e-05	0.00140695	0.000946121	5.61e-05	0.00247123
Cutibacterium_acnes	0.00052993	0.0188459	0.000240137	0.000117724	0.00040993	0.00238272	0.0024993	0.00129929	0.000496879	0.00133198	0.00169209	0.00329421	0.00838286	0.000478589	0.000100532	5.44e-05	0.000393705	6.81e-05	0.00013933	0.000275589	0.126959	0.000112971	0.00274862	5.7e-05	0.00217982	0.0020167	0.000144636	0.00199957	0.00206067	0.000486412	0.000358639	7.4e-05	0.000351102	9.15e-05	0.000146108	0.000380218	0.0393974	0.0101677	7.12e-05	0.000170246	0.000821927	4.35e-05	2.87e-05
Streptococcus_anginosus	0.0140441	0.000999482	5.97e-05	0.00405543	0.00129115	0.000845947	0.0083958	0	0.000451598	0.0021364	0.0130757	0.000398972	0.00524374	0	0.00831954	0	0.00600169	0.00100642	0.00664139	2.84e-05	0.00107051	0.00011666	0.00086906	0	0.00756382	0.0012387	7.56e-06	0.00436291	0.00508499	0.000193774	0.0178114	0.00083167	0.00104593	0	0.0381528	0.0749452	0.00112082	0.00107837	0.000296339	0	0.000428964	9.09e-05	0.000763544
Corynebacterium_propinquum	0.000774897	0	3.09e-05	1.89e-06	0	8.28e-05	1.63e-05	0	3.94e-05	0.0024499	2.29e-05	0	0.0322271	9.86e-06	3.69e-05	0	0	0.00124886	3.9e-05	0.0335559	0	0.00367778	7.84e-05	6.41e-06	0	0.00339896	1.29e-05	1.65e-05	0.00314576	0.0563664	0	0	0.0825613	0	8.72e-05	8.97e-05	6.74e-05	9.61e-06	0	0	1.12e-05	0.000956556	0
Neisseria_mucosa	0.00115435	0.000595197	7.34e-05	0.0225442	0.0211389	1e-05	0.00441681	0	4.15e-05	0.00141677	0.00754138	0.000373862	0.00171207	0	0.000670897	0	0.00266094	0.0146668	0.0592285	3.42e-05	0.000259245	0.000474939	0.0140893	2.93e-05	0.000237124	6.64e-06	0	0.000913648	0.000453945	0.000715117	0.000170992	4.51e-05	0.000143834	3.29e-05	0.0120192	1.95e-05	1.53e-05	0	4.51e-05	0	0.00196558	9.18e-05	0.0205017
Gemella_sanguinis	0.000476437	0.000981786	5.55e-05	0.02854	0.0140302	0.000160641	0.0077361	0	0.000111684	0.0049825	0.00461624	0.000900777	0.00491518	1.56e-05	0.00231634	0	0.0167306	0.0041801	0.00650738	3.47e-05	0.00237448	0.000991838	0.00506463	6.64e-06	0.00306881	0.00192848	6.66e-06	0.00876822	0.00467285	0.000926027	0.00751334	0.000171066	0.00109928	2.84e-05	0.0191791	0.00097503	0.0115006	0.00749947	0.000126148	0.000191416	0.00115108	0.000105123	0.00136943
Lacticaseibacillus_paracasei	3.15e-05	0.000108898	5.28e-05	2.25e-05	1.56e-05	5.97e-05	4.08e-05	0	1.44e-05	2.98e-05	0.000114263	2.11e-05	0	0.000153067	0.000266718	0.000306563	0.000330321	3.5e-05	1.96e-05	0.000530336	0.14942	1.94e-05	1.81e-05	3.21e-05	6.12e-05	0.000575636	1.79e-05	7.47e-05	0.000115477	4.09e-05	4.01e-05	3.44e-05	1.13e-05	2.22e-05	9.75e-05	0.000429597	0.0165499	0.000705129	1.58e-05	4.68e-05	1.01e-05	2.69e-05	2.67e-05
Enterococcus_faecalis	0	0	4.52e-06	1.08e-05	0.0240037	2.92e-05	0	0	6.99e-06	0	0	0	0	6.56e-05	0	0	4.9e-05	8.54e-06	7.91e-06	0	0.0068371	0	3.96e-06	0	0	0.000213275	6.66e-06	9.27e-05	0	0.128402	1.08e-05	0	0	0	1.67e-05	0	0	0.000243516	0	0	7.24e-06	1.12e-05	2.9e-06
Neisseria_sicca	0.00022447	0.000141227	3.99e-05	0.0235583	0.0108823	3.17e-05	0.00330667	0	8.78e-05	0.0016324	0.00460928	0.00022639	0.00187701	0	0.000947873	0	0.000549598	0.017194	0.0280013	3.94e-05	9.8e-05	0.000504449	0.011513	1.26e-05	0.000206945	5.69e-06	0	0.00116299	0.000266793	0.000477184	0.000308039	4.9e-05	7.52e-05	5.06e-05	0.0133265	3e-05	3.1e-05	0	3e-05	0	0.00184157	0.000134299	0.0348548
Streptococcus_pyogenes	0.00274664	0.00601765	0.000112802	0.000252416	0.0148425	0.00052226	0.00749863	0	7.75e-06	0.085218	0.00177853	2.71e-05	0.00040707	2.65e-05	0.00856368	0	0.00265693	0.00239483	0.000809666	0	0	1.06e-05	0.00076038	0	0.000107784	4.92e-05	5.77e-06	0.00288394	0	0.00132807	0.00712916	8.9e-05	0.000688927	0	0.000241663	0.00280041	0.00179926	7.86e-05	6.93e-06	0	1.6e-05	1.27e-05	4.53e-05
Gemella_morbillorum	0.00421594	0.00112948	1.23e-05	0.00575736	0.00139475	0.000247967	0.00314638	0	0.000353893	0.0325385	0.0081435	0.00482474	0.0192016	0.000133678	0.00249483	3.73e-05	0.000965367	0.00198297	0.012263	0.000153427	0.000132847	0.000112971	0.00184268	6.64e-06	0.00285756	0.0017775	3.07e-06	0.0118167	0.00479032	0.000393479	0.00683016	2.37e-05	0.000750886	1.51e-05	0.00656382	0.00226794	0.00149911	0.000326356	6.46e-05	8.56e-05	0.00158957	4.97e-05	0.00448735
Streptococcus_sanguinis	0.00143981	0.000448865	0.000208209	0.0026482	0.0017401	0.000185409	0.00776429	0	0.000780115	0.00372379	0.00447714	0.00114869	0.0130526	1.05e-05	0.00318215	0	0.00514063	0.00174762	0.00452786	1.91e-05	0.000601035	0.00257896	0.00203384	9.62e-06	0.010806	0.00181276	3.07e-06	0.011198	0.00370722	0.00351495	0.0075403	0.00111277	0.00217349	4.42e-05	0.036717	0.000905282	0.00562527	0.000867912	0.000217225	7.85e-05	0.00137547	0.000318329	0.000599971
Xanthomonas_citri	0.00841139	0.00262309	0.000805804	7.8e-05	0.000909007	0.00332066	0.00320649	0.0137263	0.00284771	0.00183756	0.00137215	0.000546046	0.00238766	0.00356101	0.00263024	0.00306301	0.00204114	0.00056948	0.00070312	0.000846453	0.00205719	0.012585	0.00766714	0.00133109	0.00324989	0.000936417	0.0105582	0.000546105	0.00311391	0.00225806	0.00797746	0.00570414	0.000212677	0.000608893	0.000739347	0.000861046	0.000260778	0.00128672	0.0102452	0.0011485	0.0043925	0.00976256	0.000516917
Streptococcus_sp._Marseille-Q3533	7.9e-05	0.0024434	0.000329596	0.0356401	0.00638058	5.43e-05	0.00535776	0	9.06e-05	0.00801701	0.0033196	0.00115547	0.00103912	2.62e-05	0.00062576	1.66e-05	0.00363216	0.00397726	0.006626	5.04e-05	0.000306967	0.000447734	0.00741676	5.95e-06	0.00310417	0.000762508	0	0.00570733	0.00392822	0.00138739	0.00127514	0.00016055	0.000183911	1.99e-05	0.00533652	0.000726077	0.0222696	0.00103083	0.000188406	6.7e-05	0.000605731	0.000518907	0.00878275
Neisseria_subflava	0.000385449	7.28e-05	3.27e-05	0.0224313	0.00979398	6.37e-06	0.00248149	0	3.83e-05	0.00126185	0.00318149	0.000168995	0.00122517	0	0.000352888	0	0.00031275	0.020224	0.0253327	3.18e-05	7.61e-05	0.000325541	0.0094333	1.76e-05	0.000108646	0	0	0.000632152	0.000135387	0.000448184	7.23e-05	2.29e-05	2.04e-05	2.22e-05	0.0118336	1.34e-05	1.19e-05	0	1.33e-05	0	0.00102688	7.7e-05	0.0242019
Rothia_dentocariosa	0.00947674	0.00115398	2.51e-05	0.0121723	0.00772014	5.75e-05	0.00150344	0	0.000437922	0.00018475	0.00143078	0.000482673	0.0141841	1.84e-05	0.0255126	0	0.0138014	0.000389425	0.000346527	0.000115215	0.00111952	6.96e-05	0.000572739	0	0.000137963	0.0090407	0	0.00126772	0.000539558	0.004729	0.000248398	0.00617265	0.000284717	0	0.00259616	0.00774572	0.000596962	0.00193206	3.85e-05	3.7e-05	0.00063716	3.16e-05	6.07e-05
Candidatus_Nanosynbacter_sp._HMT-352	0.00210672	9.49e-05	0.000195785	0.00460538	0.00790868	0.000581845	0.00510619	0	2.54e-05	0.0104093	0.00238661	0.00165129	0.0117371	1.8e-05	0.00427774	1.13e-05	0.00696465	0.00206397	0.00691717	0.000199744	0.000834485	0.000405312	0.00198162	4.58e-06	0.0080855	1.38e-05	0	0.00516177	0.00158284	0.00536437	0.00290512	0.00035246	0.000831777	1.96e-05	0.0143678	0.00649704	0.00358093	0.000185699	8.18e-05	0.000147311	8.08e-05	7.3e-05	0.000869777
Rothia_aeria	0.000483436	0.000473707	7.26e-05	0.00719425	0.000595262	3.27e-05	0.00231229	0	0.00270047	0.00108861	0.00867805	0.000695113	0.0158592	2.04e-05	0.0015962	2.79e-05	0.0155859	0.00168732	0.000940225	8.34e-05	0.00120723	0.00110573	0.00201844	2.75e-06	0.0011632	0.00784658	2.43e-06	0.00803151	0.000221	0.00524573	0.00136587	0.000375932	0.000453384	1.85e-05	0.00219913	0.000554691	0.0163968	0.000771639	0.000161491	6.97e-05	0.000520586	0.000184901	0.000832475
Filifactor_alocis	0.0836554	4.56e-05	3.54e-06	0.000186407	0.000260034	0.000352419	0.000453406	0	1.05e-05	0.000352229	0.01023	8.37e-05	0.00547664	0	0.000194909	0	0.000192159	6.81e-05	0.0011178	0	0	1.52e-05	0.00019301	0	0.00112612	0.000298332	5.77e-06	0.000301974	0.000163261	7.91e-06	0.000209695	1.2e-05	2.56e-05	0	9.67e-05	0.000118921	0.00251394	0.000838411	9.79e-06	0	3.05e-05	0	0.000130617
Streptococcus_ilei	0.000261965	0.00037706	9.24e-05	0.0046996	0.0245561	0.000546886	0.0042543	0	9.6e-05	0.00348042	0.0006359	0.00137986	0.00204063	0	0.000896581	2.02e-05	0.000780349	0.00657743	0.00275353	0	0.00023216	0.00107807	0.00498572	0	0.00483733	4.95e-05	0	0.00551728	0.000597297	0.00430916	0.00108829	8.71e-05	0.000263326	3.12e-05	0.0212798	0.000734719	0.00148968	0.000201372	0.000289406	4.5e-05	0.0032279	0.000145883	0.00386191
Fusobacterium_pseudoperiodonticum	0.0622058	2.25e-05	6.07e-05	0.000778592	0.000560443	9.91e-06	0.0011376	0	1.19e-05	0.0019684	0.000276219	0.000190917	0.00046183	0	0.00044111	0	5.99e-05	0.0128864	0.0192219	3.82e-05	0	0.000130954	0.00161057	8.47e-06	0.000837263	0	0	0.000684068	0.000222991	3.43e-05	9.52e-05	0	5.06e-05	0	0.000415646	2.41e-05	6.56e-05	6.85e-06	6.39e-06	1.94e-05	0.000330866	1.23e-05	0.00209253
Pseudoalteromonas_sp._3J6	0	2.35e-05	4.89e-06	1.32e-06	0	1.54e-05	0	0	8.66e-06	0	0	0	0	2.72e-05	3.08e-05	1.34e-05	7.78e-06	5.49e-06	0	9.26e-06	0	6.92e-06	0.0289133	0	1.64e-05	8.54e-06	6.15e-06	8.8e-06	3.19e-05	0	5.87e-06	0.0178269	3.69e-06	5.2e-06	9.98e-07	6.17e-06	8.59e-06	1.19e-05	6.66e-06	0	7.62e-06	0.0564693	3.02e-06
Streptococcus_constellatus	0.00358752	0.000120469	4.72e-05	0.00232394	0.00125535	0.00024174	0.0130582	0	0.000172616	0.00320617	0.0237876	0.000232767	0.00281452	0	0.00379149	0	0.000988635	0.00191732	0.00163299	0	0.000767416	9.13e-05	0.00137781	0	0.00639459	0.000129483	0	0.00447662	0.000635125	0.000208933	0.00900658	0.00278569	0.000311025	0	0.0102929	0.00188834	0.00158959	0.000247204	2.32e-05	0	0.00022934	0	0.000185061
Haemophilus_parainfluenzae	8.25e-05	7.45e-05	1.66e-05	0.00502721	0.00795202	0.000161065	0.00311151	0	0.000273815	0.000519708	0.000509714	0.000252696	0.00120076	0	0.000716034	0	0.0012867	0.0040377	0.0155113	9.84e-06	0.000183148	0.00635818	0.022387	7.56e-06	0.000182801	1.45e-05	8.71e-06	0.000654787	0.000366342	0.00048048	0.00670358	0.000151725	0.00132376	3.17e-05	0.00676913	6.17e-05	1.99e-05	3.02e-05	4.83e-05	0	0.0030858	0.000373895	0.00974729
Streptococcus_intermedius	0.00197474	0.000185808	2.28e-05	0.000717637	0.000206817	7.15e-05	0.00256905	0	0.000256493	0.0070315	0.00233693	0.00212001	0.00467173	0	0.000859651	0	0.000392822	0.000492234	0.0568772	1.51e-05	6.45e-05	6.09e-05	0.000119689	2.63e-05	0.00116751	2.23e-05	0	0.00152173	0.00240113	0.00431575	0.00233789	0.000462122	0.000204564	0	0.0028828	0.00073513	0.000342258	0.000100225	4.54e-05	0	0.00111336	2.52e-05	5.31e-05
Neisseria_flavescens	0.000203473	5.48e-05	2.18e-05	0.0143482	0.00837516	7.93e-06	0.00152496	0	2.92e-05	0.00077145	0.0019236	0.000136312	0.000788409	0	0.000176444	0	0.000134551	0.0111948	0.018071	1.27e-05	0	0.000245308	0.00759935	1.65e-05	6.64e-05	0	0	0.000406704	4.58e-05	0.000359865	3.87e-05	1.13e-05	1.4e-05	1.77e-05	0.00869629	1.3e-05	0	0	0	0	0.00083088	5.66e-05	0.0162599
Actinomyces_oris	0.00239318	0.00034371	5.2e-05	0.00122933	0.00144352	0.000191637	0.00287182	0	0.00191929	0.000451146	0.00188187	0.000131529	0.00558814	0	0.00847136	0	0.00357568	0.000725987	0.00164464	0.000156322	0.000374035	0.000420067	0.00205657	0	0.00201599	0.000518721	0	0.0309661	0.00158483	0.00158249	0.0020638	0.000795616	0.000465923	7.33e-06	0.00519652	0.0020517	0.000893139	0.00310275	4.08e-05	0.000103206	0.00309189	4.25e-05	0.00049398
Dolosigranulum_pigrum	0.000354453	0	0.000187652	1.81e-05	1.06e-05	0.000419648	0	0	0	0.00625691	0.0220012	0	0.00648804	0	0	0	0.000135594	8.08e-05	7.76e-06	0.00274663	0.000430785	0.000207036	3.96e-06	4.92e-05	0	0.00655413	0	7.54e-06	0.0015689	0.0146807	1.09e-05	0	0.0231981	0	3.23e-06	3.35e-05	0.000371792	0	0	0	4.57e-06	0.000205107	3.62e-06
Granulicatella_adiacens	0.00103836	0.00066462	0.000132155	0.00669218	0.0038784	5.48e-05	0.00166521	0	0.00014952	0.00290733	0.00232104	0.000788379	0.00753244	0	0.00653458	0	0.0058393	0.00189336	0.00304297	2.95e-05	0.000819007	0.00026283	0.0016334	0	0.0032818	0.000100709	2.43e-06	0.00707511	0.00341255	0.00281038	0.00355213	0.000220452	0.00034348	0.000122536	0.00818	0.000640281	0.000733949	0.000452658	0.000100864	5.12e-05	0.000238292	0.000475796	0.00136774
Streptococcus_sp._oral_taxon_431	0.000315458	0.000398159	0.000193977	0.00772554	0.0056369	2.58e-05	0.00133128	0	0.000102263	0.00420006	0.00120126	0.000530103	0.0030804	1.67e-05	0.00193883	0	0.00871013	0.00103893	0.00350496	6.19e-05	0.000816428	0.000284963	0.00129966	0	0.00133997	0.00170651	0	0.00761169	0.00169632	0.00215524	0.00283326	0.000254815	0.000658439	8.75e-06	0.00589883	0.000889028	0.0104496	0.000974459	0.000127507	8.73e-05	0.000419059	0.000510285	0.000874123
Streptococcus_koreensis	0.000170977	0.000240597	5.74e-05	0.00545136	0.0163634	0.000297646	0.00269669	0	6.82e-05	0.00193072	0.0006359	0.000783596	0.00109783	0	0.00057652	0	0.0015209	0.00489407	0.00163055	0	0.00057395	0.000577765	0.00302422	0	0.00312486	0.000627967	0	0.00371621	0.000438018	0.0017723	0.000701416	6.1e-05	0.000266769	3.08e-05	0.0122467	0.000607568	0.00626056	0.00142659	0.000169239	0	0.00150157	9.96e-05	0.00241328
Neisseria_meningitidis	0.00014998	0.000215074	1.01e-05	0.00767509	0.00821798	0	0.00247332	0	1.26e-05	0.000383108	0.00124299	0.000330816	0.00149171	0	0.000137462	0	0.000231152	0.0047516	0.0193689	0.000174849	0	0.000460644	0.00828831	0	3.88e-05	0	0	0.000441555	7.76e-05	0.000162796	8.18e-05	6.99e-05	4.57e-05	0	0.00970986	0	0	7.38e-05	0	6e-05	0.000941359	2.8e-05	0.0100287
Streptococcus_infantis	0.000180976	0.000401222	6.01e-05	0.0174106	0.00755122	8.55e-05	0.000715357	0	2.51e-05	0.00148324	0.000830645	0.000296539	0.00234807	0	0.000320061	0	0.0183452	0.000382339	0.00082994	3.71e-05	0.00190629	0.000139254	0.000603326	0	0.00157795	0.000786856	0	0.00150125	0.000917846	0.0014711	0.00487248	0.000139144	0.000102774	5.44e-06	0.00177055	0.000421985	0.00508465	0.00195774	8.58e-05	0.000131433	0.000157909	0.000205542	0.000989047
Streptococcus_sp._oral_taxon_061	0.000141981	0.000471666	0.000118751	0.0125109	0.00964829	7.49e-05	0.00216462	0	7.35e-05	0.0022594	0.000567342	0.000783596	0.00153657	0	0.000640122	1.66e-05	0.00692349	0.000590042	0.00238284	3.94e-05	0.000531387	0.000418223	0.00120275	0	0.00147965	0.00120202	0	0.00309016	0.0025624	0.00198453	0.00245289	0.000247116	0.000115559	7.57e-06	0.00492993	0.00104971	0.00946949	0.00110972	0.000192348	7.06e-05	0.000401154	0.000658432	0.0017107
Abiotrophia_defectiva	4.15e-05	0.000715666	0.000417774	0.000464518	3.09e-06	0	0.000202586	0	9.36e-05	0.00512276	0.00644644	0.000139501	0.00255458	0	0.023861	0	1.28e-05	0.000275571	0.000644598	6.72e-05	0.000205074	0	3.74e-06	0	0.0015426	4.68e-05	0	0.0113121	0.00131206	8.17e-05	0.000516466	1.22e-05	0.0010806	2.98e-05	0.00814782	0	0.000569523	0	0	0	0	0.00856624	0.000103697
Streptococcus_rubneri	0.000277963	0.000912023	8.55e-05	0.00451192	0.0062108	0.000355533	0.00213123	0	8.36e-05	0.00419482	0.000725324	0.00076566	0.00285147	0	0.00100122	0	0.00198345	0.00351754	0.00170028	0	0.000354688	0.000548716	0.0025004	1.28e-05	0.00558923	0	0	0.0027307	0.00279734	0.000871982	0.000610368	4.86e-05	0.000228659	2.39e-05	0.0153008	0.000582261	0.00752884	0.000497963	0.00019697	0	0.00117203	0.00025327	0.00129712
Streptococcus_sp._LPB0220	0.00319608	0.000381484	6.4e-06	0.0041196	0.0194864	0.000225888	0.0001217	0	2.22e-05	0.00277963	0.000349745	0.000304112	0.00434516	0	0.006432	0	0.00442294	9.04e-05	0.000308855	1.97e-05	0.000521069	0.000256836	0.000159766	0	0.00036474	0.00060694	0	0.00402662	0.00100147	0.00698113	0.00610638	0.00108442	7.74e-05	0.000144772	0.00177206	0.00231279	0.000204224	0.000274466	2.43e-05	0	9.51e-05	0.000163998	0.000146914
Mogibacterium_diversum	0.00233119	0.000386929	0.000119052	0.00377794	0.0204709	0.000180739	0.00218095	0	4.5e-05	0.00187262	0.00220975	0.000123956	0.00656919	1.05e-05	0.00433519	0	0.00172445	0.000713691	0.00296043	3.13e-05	0.000282461	0.00028773	0.000493236	4.35e-06	0.000711372	0.000102132	2.56e-06	0.00238346	0.000883999	0.00259617	0.00482473	0.000115484	0.000314713	1.54e-05	0.00505902	0.000941082	0.0010052	0.000240619	5.91e-05	0.000157896	0.000189148	5.34e-05	0.000639567
Streptococcus_pseudopneumoniae	0.000794895	0.00079836	0.000277261	0.00332474	0.000250156	0	0.000259725	0.000644298	0.000305573	0.000922181	0.00260818	0.000213636	0.00237248	0	0.0101148	0	0.00393368	0.000932161	0.000962368	8.4e-05	0.000550734	0.000473555	0.00305844	0	0.00101489	0.000403783	8.33e-06	0.0232308	0.00151116	0.00179801	0.00244814	0.000383068	0.000800798	8.02e-05	0.000265596	0.000739656	0.0019771	0.000929022	2.39e-05	0.000135844	0.000100574	0.000439564	0.00058633
Streptococcus_gordonii	0.0125368	0.000181384	4.19e-05	0.00222492	0.000491298	6.78e-05	0.000788822	0	8.75e-05	0.000576232	0.000985646	0.000101238	0.00734903	0	0.00349605	0	0.00303507	0.000653673	0.000528849	2.95e-05	0.000350819	0.000114815	0.000241927	0	0.000714821	0.000530736	0	0.00518602	0.00078445	0.000947118	0.00452288	0.0029115	0.000996018	8.28e-06	0.0167875	0.00028146	0.000529725	0.000712768	3.7e-05	4.06e-05	0.000132385	5.25e-05	0.000129169
Streptococcus_gwangjuense	0.00212722	0.00119176	0.000133435	0.00269403	0.000271393	1.77e-05	0.00034729	0	0.00149246	0.000952013	0.00218193	0.000270233	0.0145351	0	0.0011674	0	0.00347105	0.00105199	0.00119832	3.53e-05	0.000465609	0.000428828	0.00333513	0	0.00182025	0.00017043	0	0.0195006	0.00130211	0.00187117	0.00232172	0.000162428	0.000294552	1.73e-05	0.00110874	0.00121719	0.000342049	0.000214805	1.74e-05	0	0.000113527	0.000201971	0.00093762
Propionibacterium_acidifaciens	0.000641915	0.00016641	0	0.00129407	2.28e-05	0	0.00609834	0	0	0	0.00207065	0	0.00111367	0	0.00365608	0	0.0109704	7.85e-06	5.02e-05	0	0.000762257	1.15e-05	2.2e-05	0	0.00132789	0.000287897	0	2.3e-05	7.37e-05	0	0.00215818	6.95e-06	9.1e-05	4.97e-06	0.00010889	8.99e-05	0.0340691	0.00237813	0	2.38e-05	0	7.23e-06	0.00107934
Streptococcus_vestibularis	0.0119809	0.000174237	4.44e-06	0.000574055	0.000443885	0.000144931	4.75e-05	0	1e-05	0.000203592	0.000370611	0.000109209	0.00526552	0	0.0030693	0	0.00711645	0.000689309	0.0017647	0	0.000590717	3.64e-05	4.76e-05	0	0.00128306	0.00330773	0	0.0119735	0.00304024	0.00137948	0.00400356	0.00188905	2.19e-05	0	0.00398199	0.000962685	0.000262873	0.000374295	3.26e-06	0	4.99e-05	7.05e-06	2.39e-05
Streptococcus_sp._NSJ-72	0.00440542	0.000151096	1.54e-05	0.000716826	0.000170886	0.000322414	0.00389291	0	9.72e-05	0.00307586	0.0211109	8.33e-05	0.00119482	0	0.00424286	0	0.000730284	0.000397969	0.00100522	0	0	0	0.000313079	0	0.00609538	0	0	0.00309519	0	6.72e-05	0.0044358	0.00167536	0.000132524	0	0.003574	0.0031798	0.000570779	0.00015093	0	0	0.000177148	0	6.34e-05
Sphingobium_yanoikuyae	0	0.00158889	9.94e-06	7.38e-06	1.52e-05	0.000416534	0	0.000292296	0.000107277	5.23e-05	0.000172885	3.91e-05	0.000213101	7.21e-05	0	0.000106722	9.63e-06	3.04e-05	6.61e-06	0.000247799	0.0274812	0	1.9e-05	0	0.00633854	0.00180675	0.00193639	0.00184598	0.00362957	0.00193708	0.00374993	0.00139388	0.00084948	0.00142737	6.99e-06	1.54e-05	0.00146329	0.000603324	0.00166181	0.0028933	0.00100098	0.000553658	0.00060142
Streptococcus_sp._HSISM1	0.00192924	0.000231069	5.42e-06	0.00334628	0.0153967	0.000104877	0.000112795	0	2.45e-05	0.00163397	0.000242437	0.000239144	0.00282046	0	0.00354734	0	0.00232917	5.43e-05	0.000246883	1.85e-05	0.000336631	0.000205653	0.000143605	0	0.000176765	0.000156043	0	0.00284729	0.000806351	0.0058811	0.00547951	0.000871291	6.54e-05	0.000130342	0.00158689	0.00138899	0.000140757	6.94e-05	1.66e-05	2.29e-05	8.21e-05	9.65e-05	0.000120477
Enterococcus_faecium	0.000661412	0.00265882	9.73e-05	0.000124992	1.25e-05	0.00223722	0.000247852	0.000597067	0.000254973	0.00192077	0.00124895	9.13e-05	0.00148181	0.00332019	0.00164134	0.00236776	0.00110594	0.000409501	6.57e-05	0.000441175	0.00159029	0.000276202	5.86e-05	0.000104893	0.00186595	0.0079914	0.000315279	0.000390178	0.00311391	7.98e-05	0.000173054	0.000125811	0.000228167	0.00012017	3.83e-05	0.000592548	0.000495164	0.0116594	0.000209476	0.00079301	0.000291056	0.00098878	5.81e-05
Actinomyces_pacaensis	0.000237969	0.00013272	9.25e-05	0.0048438	0.00989758	6.09e-06	0.000958014	0	2.43e-06	0.000525989	0.00063292	0.000113992	0.000965883	0	0.000802204	0	0.00132096	0.00057476	0.000473635	1.85e-05	0.000168961	0.000128648	0.000720574	0	0.000656187	0.000127427	0	0.00158119	9.76e-05	0.00139267	0.000794684	8.02e-05	5.93e-05	2.01e-05	0.0174473	0.000954867	0.00349694	0.000330702	0.000103719	2.21e-05	0.000328961	3.62e-05	0.000168764
Streptococcus_milleri	0.000838889	0.000105495	9.19e-06	0.000736496	0.000163725	8.94e-05	0.00252082	0	0.000152407	0.000578326	0.00763378	2.15e-05	0.0006492	0	0.00102789	0	0.000453398	0.000174984	0.00066933	0	0	0	0.00016302	0	0.00128737	3.95e-05	0	0.0018546	0.000436027	7.58e-05	0.00505711	0.00058061	9.24e-05	0	0.0100791	0.0119699	0.000457042	9.27e-05	6.65e-05	0	9.92e-05	0	7.87e-05
Vibrio_sp._Scap24	0.0133122	1.6e-05	5.65e-06	2.57e-06	0	1.34e-05	0	0	8.05e-06	1.47e-05	1.39e-05	4.78e-06	0.0110193	2.21e-05	0	0.0204857	7.22e-06	6.88e-06	4.31e-06	9.84e-06	0	1.15e-05	5.97e-06	5.73e-06	0	1.01e-05	1.22e-05	7.9e-06	3.58e-05	0	5.55e-06	7.32e-06	0	8.04e-06	1.36e-06	5.14e-06	2.93e-06	1e-05	1.07e-05	1.41e-05	1.5e-05	1.32e-05	5.43e-06
Streptococcus_agalactiae	0.00335006	0	3.62e-05	0.000727877	0.00142167	0	0.000542454	0	9.69e-05	0.000883451	0.0014427	0.000140298	0.00213101	0	0.00140335	0	0.000719051	0.00022625	0.00129883	0	0	0.000116199	0.00266076	0	0.00217723	0	0	0.00469812	0	0.000609003	0.00201161	0.000179892	0.000441582	0	0.013235	0.00148713	0.00057434	0.000285529	0	0	0.000108384	6.62e-05	0.000211378
Pseudoalteromonas_sp._Scap06	0	0.00491914	0.000321237	3e-05	0	0.00373479	0	0	0.000604612	0	0	0	0	0.0040379	0	0.00397904	0.000889627	0.000535511	0	0	0	0	0.00241645	0	0	0.00197433	0.00120974	0.000592272	0	0	0.00131638	0.00162222	0	0.000231351	0.000114419	0.00172971	0	0.00222233	0.00121703	0	0.000885167	0.00529071	0.000174197
Haemophilus_parahaemolyticus	0	1.33e-05	5.8e-06	3.86e-05	3.7e-06	6.37e-06	2.75e-05	0	6.17e-05	0.000203068	0	0	5.41e-05	0	0.000254408	0	3.93e-06	0.00111145	0.00188836	0	0	0.000115276	0.000192359	0	3.97e-05	0	0	0.000141736	0	0.000557594	0.000655258	0.000267021	0.0338039	0	3.84e-06	2.59e-05	5.66e-06	6.32e-06	3.94e-06	0	2.51e-05	0	0.000176128
Actinomyces_sp._oral_taxon_414	0.000296961	0.000109579	2.86e-05	0.000649575	0.00123856	4.16e-05	0.00185221	0	2.46e-05	2.67e-05	0.00078494	6.42e-05	0.00127927	0	0.000385715	0	0.00109743	0.00271972	0.00127467	0	9.16e-05	0.000212109	0.0110862	0	0.00175558	7.16e-05	0	0.00202652	0.00110301	2.7e-05	0.00109543	0.000376495	0.00109019	2.51e-05	0.00385961	0.000255536	0.000435887	0.000398397	0.000133896	9.7e-06	0.00130232	2.85e-05	0.00182055
Streptococcus_australis	0.000470438	0.000232089	7.96e-05	0.00264904	0.00290815	4.8e-05	0.00188857	0	0.000154686	0.000924798	0.00050872	0.00031009	0.00212574	0	0.000851445	0	0.00156912	0.00165315	0.00111464	0	0.000223131	0.000305252	0.00241444	0	0.00116924	0.000257858	0	0.00482027	0.000659017	0.00190478	0.00149499	0.000172568	0.000129082	3.48e-05	0.00422463	0.000340509	0.00162353	8.64e-05	6.39e-05	0	0.000396011	8.76e-05	0.000970214
Staphylococcus_epidermidis	0.00052993	0.000480514	2e-05	0.000125181	1.28e-05	0.000107707	0.00204515	0	3.19e-06	0.000899676	0.000405387	0.000431655	0.00178002	2.04e-05	0.0173448	8.42e-05	0.000111284	5.65e-05	9.33e-05	4.23e-05	0.00476185	0.000372112	6.46e-05	0.000123674	0.00347581	0.000172169	3.2e-06	0.000494728	0.00113088	0.000140387	0.000755029	5.76e-05	0.000220791	0	2.34e-05	0.000156573	0.000571408	0.000231268	0.000121118	6.26e-05	0.000140766	0	7.12e-06
Arachnia_propionica	0.00038095	0.000436954	0.000181176	0.000752248	0.000249539	0	0.00137654	0	0.000166994	7.22e-05	0.000231508	2.43e-05	0.00118162	0	0.000211322	0	0.000376695	0.000423741	0.00342372	3.88e-05	3.61e-05	0.000148015	0.00450192	2.29e-06	0.000825191	0.00201987	0	0.00143029	0.00910877	0.000207615	0.000380211	6.99e-05	0.000105724	6.1e-05	0.00634522	0.000168917	0.00110009	4.71e-05	3.1e-05	9.7e-06	0.000731639	1.16e-05	0.000300468
Pseudoalteromonas_sp._Scap25	0	0.00499435	0.000366117	4.13e-05	0	0.00416576	0	0	0.00075246	0	0	0	0	0.00516652	0	0	0.00110273	0.000952445	0	0	0	0	0.00250924	0	0	0.00201433	0.0013531	0.0004288	0	0	0.00099629	0	0	0.000294511	7.49e-05	0.00154165	0	0.00283461	0.00167554	0	0	0.00495409	0.00032087
Lancefieldella_parvula	0.00090338	4.32e-05	3.03e-05	0.00246728	0.00730514	1.68e-05	0.000281987	0	6.38e-06	0.000271107	0.000932985	2.91e-05	0.000800944	5.44e-06	0.00255844	0	0.00728511	0.000142544	0.000298359	4.69e-05	0.000624251	5.81e-05	9.76e-05	0	0.000254369	0.00132913	0	0.00142131	4.38e-05	0.00180592	0.000823712	0.000188154	0.000130065	4.49e-06	0.00177117	0.000735542	0.000689543	0.00125498	4e-05	2.03e-05	4.34e-05	0.000205368	0.000269564
Acetobacter_aceti	3.2e-05	0.000292324	9.13e-05	3.45e-05	5.01e-05	5.52e-05	6.16e-05	3.03e-05	1.78e-05	3.66e-05	3.97e-05	2.83e-05	3.89e-05	0.000146604	0.000252356	0.000383814	0.00012019	8.25e-05	1.54e-05	0.000983669	0.0259967	2.35e-05	5.23e-05	4.28e-05	5.35e-05	2.4e-05	1.87e-05	7.2e-05	9.76e-05	2.83e-05	3.85e-05	3.74e-05	7.13e-06	1.94e-05	0.000412293	0.000778542	0.00458132	1.44e-05	1.52e-05	5.03e-05	1.12e-05	2.47e-05	1.92e-05
Corynebacterium_pseudodiphtheriticum	0.000212472	8.17e-06	0.000324099	1.57e-06	0	0.000497916	9.65e-06	0	0.000415889	0.0216754	0	0	0.00141122	0	0	0	5.46e-06	4.58e-05	6.47e-06	0.00132931	0.000107051	0.000184442	3.19e-05	1.24e-05	0	0.00043066	1.36e-05	4.67e-06	0.00222792	0.00242547	0	0	0.0033753	0	1.35e-05	3.5e-06	1.84e-05	0	0	0	0	3.21e-05	9.17e-06
Haemophilus_haemolyticus	4e-05	3.4e-05	2.09e-05	0.000312615	8.1e-05	0	0.000256015	0	0.000119129	4.24e-05	6.26e-05	0.00040256	0.000349011	0	0.000324164	0	5.78e-05	0.00145385	0.0228849	0	0	0.00064647	0.000365358	1.05e-05	0.000108646	1.28e-05	0	0.0023752	0.000276747	4.61e-05	0.0022045	0	0.0013481	0	0.00032877	0.000113778	2.33e-05	6.19e-06	0	0	8.93e-05	2.87e-06	0.00016297
Klebsiella_variicola	0.000951374	0.00174782	0.000224399	4.42e-05	0.0001152	0.00178064	0.000546907	0.00168783	0.000471655	0.000890779	0.000590195	0.000145479	0.000837891	0.00196096	0.00132128	0.00133821	0.00057768	0.000290923	0.000142781	0.000335223	0.000933797	0.00125605	0.000826868	0.000172456	0.00122787	0.000811835	0.00134413	0.000283831	0.00244095	0.000358547	0.00104102	0.00083843	0.000174813	0.000206986	0.000377302	0.000490292	0.000135311	0.000865542	0.00147775	0.000469279	0.000798879	0.00159461	0.000182044
Porphyromonas_endodontalis	0.00342505	7.42e-05	7.08e-06	0.000284488	0.00102186	0.000507965	0.000428917	0	6.03e-05	0.00040823	0.00402406	0.000330816	0.0107138	6.46e-06	0.000494453	0	0.000427242	0.000167204	0.00299351	0	8e-05	1.11e-05	0.000173487	0	0.000321626	1.75e-05	1.79e-06	0.000277903	8.76e-05	9.49e-05	0.00213724	1.93e-05	3.05e-05	4.97e-06	6.98e-05	3e-05	1.63e-05	5.57e-05	2.24e-05	1.85e-05	0.000277341	0	0.000800726
Streptococcus_sp._NPS_308	9.55e-05	8.85e-05	0.000417925	0.00168031	0.000232993	0	0.000722036	0	0.000220025	0.000191554	0.00121318	0.000109608	0.000767956	0	0.00041649	0	0.00311097	0.000429924	0.00114699	4.57e-05	0.000314705	8.07e-05	0.000660377	0	0.000336285	0.000498484	0	0.00362423	0.000414126	0.000379638	0.000475859	4.28e-05	0.000276358	1.14e-05	0.00642969	8.21e-05	0.00223662	0.000647181	2.47e-05	0	3.39e-05	7.05e-05	0.00168861
Streptococcus_sp._FDAARGOS_192	0.00106636	5.31e-05	5.12e-06	0.00169904	0.000770841	4.4e-05	7.57e-05	0	2.86e-05	0.00026849	0	8.33e-05	0.000629408	0	0.000523177	0	0.00285077	0.000192351	0.000416983	0	0	0.000317241	0.000101359	0	0.000240573	0.00778113	0	0.00190256	0	0.00133862	0.00112683	0.000419497	6.15e-05	0	0.00289788	0.00110753	0.00179947	0.000371135	1.75e-05	0	0.000275436	1.13e-05	6.65e-05
Prevotella_melaninogenica	0.000446441	0.000134762	2.76e-05	0.000989695	0.00479828	7.15e-05	0.000451922	0	5.9e-05	0.000621242	0.000877344	0.000318062	0.00434186	0	0.00353709	0	0.000601509	0.00202159	0.0017913	3.18e-05	0.000304387	0.000294646	0.00113479	0	0.000210394	1.2e-05	2.95e-06	0.00132287	0.000256838	0.00071314	0.00107163	3.47e-05	4.75e-05	2.34e-05	0.000996983	9.28e-05	0.0001085	3.91e-05	3.34e-05	3e-05	0.000269531	5.31e-06	0.00013617
Lautropia_mirabilis	4.85e-05	1.77e-05	1.54e-05	0.000448226	3.7e-06	4.1e-06	0.000124668	0	9.47e-05	0.000137647	0.00188783	0.000131131	0.00105495	0	0.000701672	0	0.000226258	0.00315645	0.00733646	1.56e-05	2.97e-05	0.00107438	0.00151702	6.64e-06	0.000248333	0.000110037	0	0.00032407	0.000222991	0.00235099	0.000473321	0.000104968	0.000251771	1.23e-05	0.00354246	2.88e-06	9.84e-06	0	2.47e-05	0	0.000259055	4.76e-05	0.00137993
Actinomyces_sp._HMT_175	0.00119034	9.63e-05	1.44e-05	0.000333771	0.000934812	2.38e-05	0.0024518	0	0.000232333	0.000108338	0.000312982	4.98e-05	0.0021099	0	0.00133974	0	0.000699073	8.36e-05	0.0010541	0.000140111	9.29e-05	9.13e-05	0.000729956	0	0.000226777	4e-05	0	0.0103101	0.000418108	0.00073489	0.000322791	0.000391142	5.73e-05	0	0.00138826	0.000288661	0.00011269	7.9e-05	1.43e-05	0	0.00061335	9.49e-06	0.000268357
Lactiplantibacillus_plantarum	0	0	5.87e-06	5.92e-06	1.74e-05	0	0	0	0	0	0	0	0	0	0	9.59e-06	0.00015477	1.56e-05	0	0.00012911	0.0248772	0	7.59e-07	0	0	0	0	6.83e-06	0	0	2.65e-05	0	0	0	5.96e-06	8.13e-05	0.000886855	0	0	0	0	0	0
Streptococcus_thermophilus	0.00280813	6.67e-05	1.02e-05	0.000820905	0.000379432	2.43e-05	7.87e-05	0	4.06e-05	0.000317163	0.000189777	6.1e-05	0.000997552	0	0.000654484	0	0.0024959	0.00225847	0.00211712	1.16e-05	0.000322444	7.7e-05	8.66e-05	0	0.000507014	0.00102859	0	0.0016852	0.00088599	0.000562207	0.00134906	0.000325044	9.24e-05	0	0.00416506	0.0002757	0.000264548	0.000174504	1.21e-05	0	0.000147433	8.36e-06	7.79e-05
Corynebacterium_argentoratense	0	0	8.27e-05	0.012556	5.19e-06	0	0	0	0	9.42e-06	0.00251975	0	0.000395194	0	0	0	0	6.25e-06	0	0	0	0	0	0	0	0	0	3.95e-06	0	0	6.15e-05	0	0	1.23e-05	2.87e-06	2.67e-06	0	1.79e-05	0	0	0	0	0.00944031
Enterobacter_hormaechei	0	0.00132175	6.88e-05	1.99e-05	0.000107298	0.00103631	0.000517966	0.00230985	0.000514809	0.00117026	0	7.45e-05	0.000713856	0.00145005	0	0.00143882	0.000502902	0.000143933	0.000156297	0.000225219	0	0.00150643	0.0004947	0.000340102	0.000599277	0.00078148	0.00124421	0.000137245	0.00098753	0	0.000950449	0.000626053	0.000122935	5.96e-05	8.33e-05	0.000373017	5.91e-05	0.000736343	0.00138885	0.000282273	0.000768973	0.000982771	7.03e-05
Actinomyces_sp._oral_taxon_169	0.00254416	4.19e-05	5.95e-06	0.00010751	0.000776026	5.73e-05	0.00157764	0	0.000169425	0.000271107	0.000115257	0.000228383	0.00410632	0	0.000533435	0	0.00192624	5.56e-05	0.000226609	4.05e-05	0.000167671	0.000352746	0.000798234	0	0.000132789	0.000133751	0	0.00210179	0.000547522	0.00331393	0.000153385	0.000185713	5.93e-05	1.25e-05	0.00143075	0.000635755	4.11e-05	3.61e-05	8.97e-06	0	0.000574682	3.22e-06	0.000199065
Lentilactobacillus_buchneri	1e-05	5.82e-05	2.39e-05	9.81e-06	1.01e-05	1.91e-05	1.26e-05	0	5.01e-06	1.73e-05	0	5.18e-06	0	6.12e-05	5.13e-05	0.000191646	0.000104464	2.08e-05	3.88e-06	0.000240851	0.0195414	5.99e-06	1.12e-05	1.05e-05	2.59e-05	0.000126479	7.56e-06	2.53e-05	6.37e-05	2.04e-05	1.81e-05	1.28e-05	0	8.28e-06	3.26e-05	0.000117275	0.00196641	0.000143818	5.03e-06	1.85e-05	4.76e-06	1.16e-05	9.3e-06
[Haemophilus]_ducreyi	0.00067991	0.00118835	0.000172366	5.37e-05	0.0001415	0.00110991	0.00029015	0.000964219	0.000365746	0.000905956	0.000496797	0.000209251	0.000612914	0.00164972	0.00111611	0.00130682	0.000504266	0.000246603	0.000116036	0.000456228	0.000282461	0.000684281	0.000298816	0.000155508	0.000941598	0.000698479	0.000709474	0.000283831	0.00141559	0.000197728	0.000348487	0.000323354	0.000171863	0.000201545	3.03e-05	0.000309853	0.000102217	0.000677472	0.000590367	0.000429584	0.000499061	0.000898725	0.00014281
Streptococcus_periodonticum	0.0014803	7.21e-05	4.82e-06	0.000977239	4.51e-05	4.5e-05	0.00122293	0	0.000120497	9.84e-05	0.00165434	4.07e-05	0.000376721	0	0.000935563	0	0.000489022	0.000106699	0.000428486	0	9.93e-05	0	0.000153746	0	0.000965741	3.02e-05	0	0.00084754	0.000489783	0	0.00438377	0.000183647	4.6e-05	0	0.00451812	0.00245763	0.000152068	6.18e-05	2.73e-05	0	5.05e-05	0	0.000125185
Corynebacterium_macginleyi	0.000232469	4.9e-05	1.66e-06	1.96e-05	1.4e-05	0	0.00059811	0	2.13e-06	0.000463707	0.000450098	4.5e-05	0.000377381	0	0.000172341	0	3.53e-06	0.000427631	0.000530431	0	3.22e-05	0.000417301	0.0020121	0.000275288	0.000100023	0.00284435	3.72e-06	0.000880055	0.000818296	0.000540457	1.32e-05	1.88e-05	0.00253713	0	0.00438663	4.94e-06	0.00364251	1.84e-05	0	0	0	1.47e-05	9.9e-06
Olsenella_sp._oral_taxon_807	0.000704907	6.3e-05	2.84e-05	0.000585944	0.000650331	1.08e-05	0.00151308	0	2.52e-05	3.66e-05	0.00117244	4.74e-05	0.000910464	0	0.000215426	0	0.00122019	0.00184293	0.00091348	1.22e-05	0.000109631	8.3e-05	0.00310969	0	0.000888999	3e-05	1.54e-06	0.00075305	0.000334486	7.25e-06	0.00269685	0.000284296	0.00015539	0	0.000618785	0.000203894	0.000576016	4.94e-05	0.000140421	2.82e-05	0.0005223	5.83e-05	0.000695338
Treponema_denticola	0.00037995	8.24e-05	3.39e-06	8.73e-05	0.000306706	1.34e-05	0.000768044	0	4.39e-05	0.000140264	0.000441156	8.13e-05	0.000742886	0	0.000334423	1.01e-05	0.000112006	0.00095432	0.00956113	0	3.48e-05	3.78e-05	0.000457334	8.93e-06	0.000463901	3.37e-05	9.1e-06	0.000330537	0.000340459	4.15e-05	0.004435	3.17e-05	0.000102774	3.78e-06	4.54e-05	0.000112955	3.08e-05	3.52e-05	0	0	0.000193529	0	0.000486616
Granulicatella_elegans	0.000422944	0.000393395	0.000173043	0.00180714	8.04e-05	0	0.000102406	0	0.000127639	8.16e-05	0.000422278	0.00024313	0.000368144	0	0.00237789	0	0.00264152	0.000301898	0.00195838	2.89e-05	0.000301807	1.48e-05	3.67e-05	0	0.000575996	0.000251693	0	0.00241867	0.00116075	2.18e-05	0.00110367	0	0.000121214	0	9.26e-05	5.86e-05	0.00254557	0.00020361	0	0.00012173	4.67e-05	4.74e-05	0.000497964
Streptococcus_sp._HSISS1	0.000439442	0	0	0.00138696	0.000605511	0	0	0	0	0	0	0	0	0	0	0	0.00387447	0.000237017	0.00027866	0	0	0	5.01e-05	0	0	0.00527954	0	0.00221765	0	0.000968209	0.00108559	0.000421374	0	0	0.00191044	0.000533705	0.00104039	0	0	0	0.000283627	0	0
Tequatrovirus_gee4507	0	0.00998937	0	0	0	0	0	0	0	0	0	0.00283904	0	0	0	0.00269681	0	0	0	0	0	0	0	0	0	0.0048639	0	0	0	0	0	0	0	0	0	0	0	0	0	0	0	0	0
Actinomyces_naeslundii	0.000387949	5.92e-05	4.82e-06	0.000184165	0.000137425	8.92e-05	0.000864513	0	0.000428957	0.000211966	0.000398431	0.000251102	0.00177672	0	0.00011079	0	0.00179434	0.000141849	0.00204537	0	0.00017412	0.000151243	0.00171697	0	0.000238849	0.000325841	0	0.00178185	0.00173415	0.00128919	0.00128863	2.57e-05	0.000133753	0	0.000789339	4.24e-05	0.000440076	3.17e-05	1.94e-05	1.59e-05	0.000848785	3.43e-05	0.000249163
Treponema_vincentii	0.00037795	4.32e-05	7.68e-06	8.09e-05	0.000235957	1.56e-05	0.000201844	0	2.54e-05	3.98e-05	0.000629939	2.71e-05	0.000339115	0	0.000765274	0	0.000215426	0.000864918	0.00951267	0	2.84e-05	1.8e-05	0.000339977	0	0.00046735	2.85e-05	3.2e-06	0.000321376	0.000139369	0	0.00394868	1.9e-05	2.78e-05	4.49e-06	4.97e-05	0.000103696	7.75e-06	1.83e-05	1.62e-05	0	8.34e-05	0	0.00056448
Prevotella_intermedia	0.00275963	8.03e-05	1.39e-05	0.000336095	0.000838751	0.000172813	0.00172457	0	8.07e-05	0.000116189	0.000555419	0.000732579	0.000971161	9.86e-06	0.001469	0	0.000749299	0.000337048	0.00113635	0	0.000138006	2.54e-05	0.000580928	0	0.000720857	3.92e-05	0	0.00125299	0.00034245	0.000184546	0.00139807	5.54e-05	1.87e-05	4.97e-06	0.000240434	8.37e-05	8.99e-05	4.37e-05	4.89e-06	3.88e-05	0.000338295	0	0.0016903
Bacillus_thuringiensis	0	0	1.42e-05	3.21e-05	0	0.00157258	0	0	2.98e-05	0.000606064	0	7.41e-05	0	0.000445935	0.00153055	9.82e-05	0.000122837	0.000380394	5.06e-05	4.23e-05	0.000606194	2.12e-05	7.32e-06	8.93e-05	0.00434756	0.000252167	2.38e-05	0.000719457	0.000794405	0	0.000144661	0.000588497	0.000342251	8.59e-05	1.65e-05	0.000766198	0.000260778	0.00312975	4.98e-05	0.000210823	3.56e-05	0.0012552	3.36e-05
Streptococcus_sp._116-D4	0.000285962	0.000226304	4.8e-05	0.00105949	0.000331278	5.52e-06	0.000201101	0	0.00013554	0.000286284	0.000610067	0.000152654	0.000851086	0	0.000424696	0	0.000705331	0.000323224	0.000659121	0	5.8e-05	0.000169226	0.00132444	0	0.000381985	4.51e-05	0	0.00688883	0.000266793	0.000794868	0.000981697	3.25e-05	7.3e-05	1.04e-05	0.000412063	0.000261709	0.000134683	6.64e-05	1.22e-05	0	4.86e-05	5.13e-05	0.000362276
Actinomyces_sp._oral_taxon_171	0.000158479	9.12e-05	9.94e-06	0.00107897	0.000414869	5.11e-05	0.000361389	0	0.000205437	0.000108861	0.000255354	4.46e-05	0.00301047	0	0.000166186	0	0.000903588	6.36e-05	0.000606926	1.1e-05	9.42e-05	0.000163231	0.000474743	0	7.59e-05	0.000168375	0	0.00420609	0.000366342	0.000591207	0.000111192	0.000392456	6.15e-05	0	0.00305328	0.000693981	0.000136568	0.000102991	1.69e-05	0	0.000196386	1.06e-05	9.11e-05
Schaalia_cardiffensis	0.00139882	0.000134081	3.81e-05	0.000356035	0.000784423	7.08e-06	0.000865998	0	1.37e-05	0.000659972	0.000160962	8.29e-05	0.00127267	0	0.000104635	0	0.000721378	7.21e-05	0.00450802	0	4e-05	2.9e-05	0.000506197	0	0.000134514	3.94e-05	0	0.00137838	0.00026082	9.89e-06	0.00041019	1.35e-05	0.000208989	0	0.000400621	0.00220066	3.5e-05	0.000615704	0	3.53e-05	0.000113717	0	0.0003024
Streptococcus_lactarius	0.000748901	8.47e-05	3.31e-06	0.000778863	0.00172985	7.95e-05	8.61e-05	0	1.23e-05	0.000940499	0.000148046	4.62e-05	0.00177804	0	0.00168853	0	0.000951166	7.75e-05	0.000239262	0	9.67e-05	7.01e-05	0.000104287	0	0.000433721	0.000113198	0	0.00109077	0.000340459	0.00109014	0.0011695	0.000180267	8.06e-05	1.56e-05	0.000989636	0.000426305	8.4e-05	0.000113527	9.24e-06	0	4e-05	3.57e-05	3.97e-05
Actinomyces_sp._oral_taxon_897	5.9e-05	6.84e-05	1.17e-05	0.000145716	0.00020336	7.22e-06	0.000156577	0	1.02e-05	5.91e-05	0.000153014	2.31e-05	5.61e-05	0	0.000149772	0	0.00012364	6.9e-05	0.000271183	0	0	0.000115738	0.00829287	0	0.000104335	0	0	7.69e-05	0.000219009	0	0.000286308	7.45e-05	1.55e-05	0	0.00136878	0.00184801	9.8e-05	7.64e-05	0	4.06e-05	0	1.34e-05	0.000175887
Mogibacterium_pumilum	0.00205123	4.19e-05	2.76e-05	0.000321667	0.0007701	2.07e-05	0.000937236	0	3.66e-05	0.000195218	0.000378559	0.000111601	0.000420265	0	0.000281079	0	0.000163275	0.000428326	0.00159014	0	0	2.54e-05	0.000233467	0	0.000272477	4.74e-06	0	0.000840175	0.000125432	0.000102819	0.000489183	1.75e-05	8.31e-05	0	0.00359793	0.000157807	0.000258684	2.46e-05	6.4e-05	0	8.25e-05	2.44e-06	0.000202204
Agrobacterium_tumefaciens	0	0.000792915	3.99e-06	3.51e-06	0	0.000131343	0	7.13e-05	4.44e-05	0	3.48e-05	1.83e-05	6.14e-05	1.73e-05	0	1.57e-05	2.41e-06	9.31e-06	0	9.21e-05	0.00524294	0	5.53e-06	0	0.00131668	0.000443782	0.000360502	0.000586524	0.000678927	0.00040007	0.000680637	0.000344197	0.000145309	0.00064201	1.48e-06	0	0	0.000140789	0.000298106	0.000561017	0.000262864	0.000154331	0.000228882
Candidatus_Minimicrobia_vallesae	0.000252967	1.36e-05	2.24e-05	0.000660004	0.00109903	5.28e-05	0.000427433	0	4.25e-06	0.001142	0.000216604	0.000225194	0.00125552	0	0.000432903	0	0.000923405	0.000239865	0.000752582	2.14e-05	0.0001135	3.41e-05	0.000234063	0	0.000859682	0	0	0.000659458	0.000111495	0.000557594	0.000323584	5.24e-05	8.29e-05	0	0.00137323	0.000734719	0.000361529	2.61e-05	9.24e-06	2.21e-05	1.64e-05	6.88e-06	0.000108405
Streptococcus_sp._A12	0.000103986	0.000106516	9.41e-06	0.000768973	0.00192445	2.75e-05	0.000492736	0	1.25e-05	0.000382585	2.68e-05	0.000132725	0.000456551	0	0.000469833	0	0.000288038	0.000422352	0.000278803	0	0	8.76e-05	0.000582826	0	0.000294896	3.75e-05	0	0.00238616	0.000135387	0.000389525	0.000349756	4.96e-05	6.22e-05	8.04e-06	0.00135148	0.000210478	0.000412637	1.8e-05	6.1e-05	0	0.000306104	2.8e-05	0.00021331
Acetobacter_tropicalis	1.6e-05	0.000125914	3.98e-05	1.48e-05	1.91e-05	2.46e-05	2.45e-05	3.21e-05	1e-05	0	3.18e-05	0	0	6.53e-05	9.23e-05	0.000162349	4.97e-05	2.9e-05	6.33e-06	0.000371119	0.00971201	1.34e-05	2.26e-05	1.63e-05	2.41e-05	8.54e-06	9.61e-06	3e-05	6.17e-05	0	1.32e-05	1.13e-05	0	1.28e-05	0.000126603	0.000266441	0.0013749	8.43e-06	1.1e-05	2.21e-05	4e-06	5.49e-06	9.42e-06
Porphyromonas_gingivalis	0.000864386	8.58e-05	7e-06	0.000164386	0.00109693	3.01e-05	0.00128824	0	4.12e-05	2.51e-05	0.000178847	0.000300525	0.000445336	0	0.000162082	0	0.000136236	0.000326906	0.00309099	0	3.1e-05	4.24e-05	0.0011522	0	0.000527709	3.18e-05	4.61e-06	0.000571434	0.000310594	8.96e-05	0.000906353	5.41e-05	0.000112363	0	0.000112602	1.79e-05	9.74e-05	4.04e-05	0	0	0.000111813	0	7.61e-05
Campylobacter_concisus	5.65e-05	9.87e-06	4.29e-06	0.000799776	0.000341896	2.28e-05	0.000147672	0	2.83e-05	0.00267077	0.000194745	7.41e-05	0.0005951	0	0.000182599	0	0.000223771	0.000527592	0.00389016	8.11e-06	4e-05	0.000128187	0.000278045	2.75e-06	0.000219016	1.52e-05	0	0.000225448	0.000137378	0.000426434	0.000289798	1.05e-05	4.25e-05	1.11e-05	0.000338445	3.39e-05	5.24e-06	1.15e-05	1.06e-05	0	0.000201148	8.01e-06	0.000138706
Actinomyces_sp._HMT897	3.2e-05	5.89e-05	1.13e-05	0.000143635	0.000133968	0	0.000185518	0	7.14e-06	4.08e-05	0.000134135	0	6.66e-05	0	0	0	0.000114653	5.33e-05	0.000278803	0	0	9.27e-05	0.0070501	0	9.57e-05	0	0	7.26e-05	0.000244892	0	0.000327708	5.75e-05	0	0	0.00122183	0.00149865	0.00012044	5.04e-05	0	2.56e-05	1.54e-05	8.1e-06	0.000157296
Acetobacter_senegalensis	1.1e-05	0.000108218	3.84e-05	1.26e-05	1.69e-05	2.43e-05	0	0	8.36e-06	1.99e-05	0	0	0	5.61e-05	8.41e-05	0.000141947	4.93e-05	2.92e-05	5.9e-06	0.000320749	0.00934313	8.76e-06	1.8e-05	1.79e-05	1.81e-05	8.85e-06	9.99e-06	2.69e-05	0	2.44e-05	1.68e-05	2.22e-05	6.39e-06	4.97e-06	0.000122175	0.000244426	0.00125844	6.85e-06	7.34e-06	0	5.71e-06	8.62e-06	5.55e-06
Selenomonas_sputigena	0.00208122	1.77e-05	6.02e-05	0.000362844	0.000925182	6.91e-05	0.000439306	0	2.58e-05	5.13e-05	0.000588208	6.94e-05	0.00142441	0	0.000318009	0	0.000960794	0.000277724	0.000474354	5.79e-05	0.000107051	1.66e-05	0.000251743	0	0.000187975	1.01e-05	0	0.000906821	0.000215027	0.000184546	0.000267274	0.00011154	1.6e-05	0	0.000199146	0.000569093	0.000402792	4.14e-05	3.21e-05	1.23e-05	6.61e-05	4.79e-06	0.000192908
Aggregatibacter_sp._Marseille-P9115	4.85e-05	1.57e-05	8.13e-06	7.98e-05	6.79e-06	0	0.000188486	0	4.65e-05	5.81e-05	7.65e-05	0.000112398	0.000164279	0	0.000246201	0	3.21e-05	0.000145531	0.00840106	0	0	4.33e-05	0.000308415	0	6.98e-05	4.58e-06	0	0.000140119	0.000222991	0.000114023	0.000412252	0	6.88e-06	0	0.000322447	7.2e-06	0	1.41e-05	0	0	0.000175624	0	0.000255923
Olsenella_uli	0.00114835	2.31e-05	3.54e-06	0.000639253	0.000306583	9.2e-06	0.000298313	0	0.000139339	3.93e-05	0.000145065	4.38e-05	0.000383978	0	0.000309803	0	0.000192801	8.11e-05	0.00048255	0	0	6.46e-06	0.000100274	0	0.000118131	2.53e-06	0	0.00138861	3.58e-05	4.09e-05	0.000479031	0.000195477	6.56e-05	3.31e-06	0.000677889	0.00329769	0.00027167	2.56e-05	0.000101408	0	1.5e-05	6.11e-05	0.000498326
Neisseria_lactamica	0	1.02e-05	4.14e-06	0.00143795	0.000488088	0	0.000184034	0	0	6.65e-05	0.000396444	0.000125551	0.000145806	0	0	0	1.64e-05	0.00176318	0.00276762	0	4.77e-05	0	0.000713687	0	0	0	0	7.26e-05	0	3.95e-05	0	0	1.84e-05	0	0.000705406	0	5.24e-06	0	0	3.62e-05	5.03e-05	3.48e-06	0.00220299
Acinetobacter_junii	0	0.000105836	7.53e-06	1.65e-06	0	6.65e-06	0	9.18e-05	6.38e-06	0	0	0	0	0.000140481	0	0.000327663	9.47e-06	4.29e-05	1.64e-05	0.000383857	0.00505076	7.84e-05	0	0	5.86e-05	7.49e-05	0	0.000288501	0	0	0.000203985	6.1e-05	1.6e-05	2.29e-05	4.58e-06	1.4e-05	0.000523232	0.000248784	0.00184138	0.000160543	0.000429155	0.000869548	0
Neisseria_elongata	0	9.19e-06	2.33e-06	0.000860894	0.000965187	0	0.000379941	0	1.93e-05	5.08e-05	0.00014109	2.23e-05	0.000486241	0	0	0	7.34e-05	0.000465907	0.00337742	0	0	7.93e-05	0.00140351	0	3.19e-05	0	0	5.01e-05	5.38e-05	4.28e-05	7.06e-05	9.01e-06	4.38e-05	3.08e-06	0.000513965	0	0	0	0	0	0.000108955	7.23e-06	0.00156499
Bacillus_mycoides	0	0	0	1.43e-06	0	0	0	0	0	0	0	0	0	3.44e-05	0	0	0	0	0	0	0.0107787	0	0	0	0	0	0	0	0	0	4.28e-06	3.38e-06	0	3.78e-06	0	0	0	0	0	0	0	1.06e-05	0
Streptococcus_dysgalactiae	0.00407696	8.13e-05	0	0.000439985	0.000243118	0	0.000127636	0	2.39e-05	0.000432305	0.000522631	3.55e-05	0.00035297	0	0	0	0.000250248	4.14e-05	0.000646755	0	0	0	0.000136555	0	0.000482871	0	0	0.000695026	0	5.8e-05	0.000221592	5.65e-05	6.29e-05	0	0.000522079	0.000224057	0.000180555	0.000292641	1.39e-05	0	5.5e-05	0	0.000127599
Fusobacterium_hwasookii	0.00691158	0	3.24e-06	7.2e-05	0.000101248	0	0.000224848	0	6.08e-06	0.0001	2.58e-05	9.37e-05	0.000116117	0	6.57e-05	0	6.9e-06	9.32e-05	0.00182624	0	0	0	0.000211774	0	6.04e-05	0	0	7.19e-05	0	0	6.12e-05	0	0	0	2.03e-05	7.72e-05	5.86e-06	1.07e-05	0	0	6.88e-05	0	7.58e-05
Campylobacter_rectus	0.000291461	4.49e-05	1.43e-06	0.000218614	7.72e-05	1.27e-05	0.000398492	0	1.29e-05	5.23e-05	0.000147052	9.45e-05	0.000213761	0	0.000112842	0	2.21e-05	0.000113368	0.00551208	0	0	2.31e-05	0.000503919	3.44e-06	0.000123305	2.69e-05	0	0.000405986	9.16e-05	9.23e-06	0.00103658	0	5.58e-05	2.84e-06	0.000128293	3.5e-05	4.25e-05	1.51e-05	2.18e-06	0	9.68e-05	5.84e-06	0.000299261
Aggregatibacter_sp._2125159857	0.000113485	2.42e-05	8.74e-06	0.000147283	4.98e-05	0	0.000296087	0	6.43e-05	4.82e-05	4.77e-05	2.99e-05	0.000935535	0	0.000773481	0	0.000256105	0.000253411	0.00393589	0	3.61e-05	0.000199198	0.000238131	0	3.19e-05	1.52e-05	0	0.000167065	0.000547522	0.000979414	0.000143234	0	3.79e-05	0	0.000682394	1.32e-05	0	0	0	0	4.55e-05	0	7.93e-05
Pauljensenia_hongkongensis	0.000269464	2.62e-05	4.97e-06	0.000250795	0.000945802	6.94e-06	0.000540228	0	8.81e-06	2.88e-05	0.000168911	2.23e-05	0.00062215	0	2.67e-05	0	0.00011706	0.000245006	0.000266869	0	0	4.38e-05	0.00052789	0	0.000112095	2.72e-05	0	0.000337543	0.000579378	4.94e-05	0.000435728	4.6e-05	0.000398801	3.78e-06	0.00258964	0.00041643	6.95e-05	9.13e-05	4.49e-06	0	0.000206482	5.66e-06	0.00014957
Streptococcus_sp._1643	0.000125483	5.51e-05	4.24e-05	0.00082847	0.000133474	0	0.000181808	0	6.66e-05	0.000167479	0.000301059	6.54e-05	0.000224977	0	0.000330319	0	0.0015278	0.000159007	0.000514183	0	0	4.89e-05	0.000392745	0	0.000156933	0	0	0.00168951	0.000133396	0.000174001	0.000243798	2.85e-05	2.26e-05	0	0.000731054	7.67e-05	0.000618117	0	2.3e-05	0	3.87e-05	1.66e-05	0.00044521
Lactobacillus_delbrueckii	0	0	0	3.9e-05	0	0	0	0	0	0	0	0	0	0	0	0	0.000621808	0	0	0	0.00880401	0	0	0	0	0	0	0	0	0	0	0	0	0	4.61e-07	0	0	0	0	0	0	0	0
Moraxella_catarrhalis	0	0	0	0	0	0	0	0	0	0	0	0	0	0	0	0	9.31e-06	2.5e-06	3.88e-06	8.74e-05	0.000423046	4.06e-05	3.53e-06	0	0	2.69e-06	0	0	0	0	6.03e-06	0	0.00849726	0	0	7e-06	0	0	0	0	0	0	0
Corynebacterium_kefirresidentii	0.000185975	5.1e-05	2.41e-06	4.46e-06	1.64e-05	0	0.000485315	0	0	0.000102581	3.97e-05	7.45e-05	0.000393875	0	8e-05	0	0	0.000262442	0.000531294	0	0.00184567	7.98e-05	0.000341225	0.000134209	0.000142274	0.000413585	0	0.00029425	0.000103531	8.17e-05	0	6.07e-05	0.0006786	0	0.00152213	3.09e-06	0.000933146	4.48e-06	0	0	0.000187053	4.27e-06	0
Prevotella_jejuni	7.1e-05	4.39e-05	4.52e-06	0.000380407	0.000642676	6.09e-06	2.75e-05	0	5.93e-06	3.19e-05	0.000175866	1.24e-05	0.00138351	0	0.000810411	0	0.00177171	5.99e-05	7.22e-05	0	0.000261824	0.000110665	3.47e-05	0	2.41e-05	4.21e-05	0	0.000983528	0	0.000687435	0.000665251	3.1e-05	1.28e-05	9.23e-06	0.000439426	4.96e-05	1.24e-05	1.36e-05	4.08e-06	0	1.01e-05	3.57e-06	1.24e-05
Veillonella_nakazawae	7.05e-05	3.16e-05	0	0.00040948	0.000822452	3.58e-05	0.000304249	0	0	0.00017533	0.000170898	1.83e-05	0.000552876	0	0.000525228	0	0.000592523	0.000736754	0.000499804	0	0	7.05e-05	0.00061081	0	0	2.69e-05	0	0.000589578	0.000280729	9.56e-05	0.000664775	1.93e-05	2.83e-05	0	0.000710039	7.82e-05	9.22e-06	0	0	0	0.000104955	5.9e-05	9.62e-05
Pseudomonas_oleovorans	0	3.78e-05	0	0	0	3.92e-05	0	0	0	0	0	0	0	0	0	0	0	0	0	0	0.00130525	0	0	0	0.000211256	5.5e-05	0.000518462	5.32e-05	0.000123441	0.000469934	0.000759154	0.000253688	0	7.29e-05	3.33e-05	0	2.74e-05	1.73e-05	0.000362811	6.97e-05	0.000357534	0.00341383	1.76e-05
Fusobacterium_periodonticum	0.0060477	0	2.49e-06	5.38e-05	4.62e-05	0	5.27e-05	0	0	0.00013032	0	0	4.49e-05	0	0	0	9.23e-06	0.00019506	0.0009408	0	0	0	8.75e-05	0	5.17e-05	0	0	5.84e-05	0	2.31e-05	7.46e-06	0	0	0	7.83e-06	0	0	0	0	0	2.67e-05	0	0.000116614
Candidatus_Nanosynbacter_lyticus	6.4e-05	2.65e-05	2.32e-05	0.000240959	9.42e-05	1.02e-05	0.000201844	0	5.01e-06	0.000116189	0.000491829	1.28e-05	0.000973141	0	0.000755016	0	0.000133187	0.00120065	0.000141055	0	0	1.94e-05	0.000410804	0	0.000125891	5.22e-06	0	0.00154813	0.000151315	0.000148955	7.19e-05	3.94e-06	3.69e-05	0	0.000221031	6.81e-05	0.00010473	9.75e-06	6.8e-06	0	4.8e-05	2.53e-06	0.000283688
Liquorilactobacillus_mali	0	0	3.16e-06	2e-06	0	0	0	0	0	0	0	0	0	0	0	3.12e-05	3.05e-05	2.15e-06	0	3.82e-05	0.0057898	0	1.08e-06	0	0	0	0	4.49e-06	0	0	0	0	0	0	7.24e-06	4.63e-05	0.00175004	0	0	0	0	0	0
Prevotella_veroralis	0.000238968	2.42e-05	2.11e-06	7.25e-05	0.000181629	9.62e-06	2.45e-05	0	2.37e-05	6.8e-06	0.000139103	5.58e-06	0.00394534	0	0.000279028	0	0.000200022	1.33e-05	0.000610377	0	4.51e-05	2.58e-05	1.27e-05	0	5.09e-05	7.9e-06	0	6.38e-05	4.58e-05	0.000259024	0.00118552	6.57e-06	9.83e-06	0	1.02e-05	6.79e-06	3.14e-06	6.59e-06	3.81e-06	0	0	5.4e-06	1.91e-05
Methylorubrum_populi	0	2.42e-05	0	0	0	0	0	0	0	0	0	0	0	0	0	0	0	0	0	0	0.0074291	0	0	0	0	0	0	0	0	0	0	5.95e-05	0	0	0	0	1.47e-05	0	0	0	0	0	0
Streptococcus_sp._oral_taxon_064	0.0001	5.58e-05	3.11e-05	0.000411911	0.000243365	0	0.000176613	0	8.42e-05	7.69e-05	9.34e-05	0.000125551	0.000430821	0	0.000219529	0	0.00056749	5.28e-05	0.000259536	0	0	9.27e-05	0.00143171	0	7.76e-05	3.21e-05	0	0.000940234	0.000215027	0.000295274	0.000443818	5.07e-05	0	0	0.000488572	3.25e-05	6.95e-05	0	3.22e-05	0	3.09e-05	1.06e-05	0.000198823
Schaalia_meyeri	0.000206973	1.57e-05	5.35e-06	0.000398969	0.00130721	6.23e-06	0.000133573	0	0	0.000157012	3.28e-05	3.51e-05	0.000336476	0	0.000121049	0	0.000212538	4.54e-05	0.000233079	0	4.77e-05	1.89e-05	0.000165623	0	3.62e-05	3.19e-05	0	0.000270358	0.00010154	0.000185205	0.00049188	5.16e-05	2.19e-05	0	0.00175781	0.000295245	0.000387921	8.82e-05	1.24e-05	0	4.53e-05	1.82e-05	6.91e-05
Burkholderia_cenocepacia	0.000392448	0.000131699	3.04e-05	1.22e-05	6.24e-05	0.000116765	0.000205554	0.000746779	0.000203006	7.54e-05	9.24e-05	2.83e-05	6.99e-05	0.000171095	0.000155927	9.57e-05	0.000224172	4.63e-05	4.87e-05	5.96e-05	8.25e-05	0.000485544	0.000115134	9.62e-05	0.000120718	7.38e-05	0.000840915	5.43e-05	0.000207063	0.000211569	0.000446673	0.000125436	2.14e-05	3.36e-05	3.94e-05	4.81e-05	3.23e-05	7.09e-05	0.000537624	7.59e-05	0.000471632	0.000102945	1.82e-05
Neisseria_macacae	0	1.74e-05	4.59e-06	0.00067908	0.000162614	0	0.00039775	0	5e-05	8.53e-05	0.000110289	2.11e-05	0.000321301	0	0	0	0.000111765	0.000703271	0.00120206	0	0	5.16e-05	0.000689825	0	4.31e-05	0	0	9.14e-05	0.000127423	0	0.000109765	0	2.09e-05	0	0.000388744	0	8.17e-06	0	0	0	9.47e-05	2.27e-05	0.00162994
Arachnia_rubra	0	2.25e-05	1.26e-05	1.97e-05	8.89e-06	0	0.000178839	0	2.49e-05	5.23e-06	0.000210642	1.67e-05	2.24e-05	0	0	0	7.54e-06	1.51e-05	0.000382186	0	0	8.58e-05	0.00106326	0	8.97e-05	2.4e-05	0	3.09e-05	0.00374704	0.000701935	3.97e-06	0	1.11e-05	4.73e-06	0.000190187	0	0.000174899	0	1.35e-05	0	3.01e-05	3.22e-06	7.12e-06
Aggregatibacter_segnis	2.5e-05	2.25e-05	7.15e-06	7.27e-05	0	0	0.000128378	0	3.37e-05	4.76e-05	7.25e-05	5.86e-05	0.000209803	0	0.000285183	0	3.25e-05	0.000169774	0.00439888	0	0	2.86e-05	0.000181025	0	3.45e-05	0	0	0.000114251	0.000147333	7.51e-05	0.000503776	0	1.11e-05	0	0.000241381	0	0	0	0	0	1.49e-05	0	0.000158624
Pseudomonas_aeruginosa	0	0	0	2.67e-06	0	3.55e-05	0	0.00171278	3.8e-05	0	0	0	0	0	0	0	0	0	8.81e-05	7.35e-05	0.00190242	0	3.25e-05	0	0	1.53e-05	0.000250968	1.46e-05	0	0	0.000207316	7.4e-05	0	2.29e-05	4.94e-05	0	0.00013217	1.25e-05	0.000161219	0	0.000102289	0.00212536	9.05e-06
Pseudomonas_sp._phDV1	0	2.38e-05	0	0	0	3.62e-05	0	0	0	0	0	0	0	0	0	0	0	0	0	0	0.0011221	0	0	0	0.00017849	3.24e-05	0.000575471	4.04e-05	0	0.000539798	0.000713788	0.000234911	0	4.73e-05	4.05e-05	0	3.08e-05	1.11e-05	0.000454839	5.47e-05	0.00039182	0.00247565	1.8e-05
Veillonella_parvula	7.8e-05	2.01e-05	1.58e-06	0.000312264	0.000391162	7.78e-06	0.000310186	0	8.66e-06	6.75e-05	0.000123206	3.67e-05	0.000742886	0	0.000697569	0	0.000228344	0.000343855	0.000412669	0	5.03e-05	5.63e-05	0.000500828	0	3.62e-05	4.3e-05	0	0.000376705	6.57e-05	0.000173342	0.000369742	2.97e-05	1.25e-05	4.14e-05	0.000674561	1.4e-05	5.86e-06	1.46e-05	2.99e-06	0	0.000113146	0.000102858	8.78e-05
Streptococcus_sp._HSISS2	0.000315458	1.97e-05	7.15e-06	0.000398591	0.000262997	0	0	0	1.47e-05	5.34e-05	5.37e-05	4.9e-05	0.000170877	0	0.000176444	0	0.00047097	0.000209787	0.000376866	0	0	0.000100982	0.000116055	0	0.00010261	0.000217543	0	0.000612033	0	0.00045082	0.000481411	6.97e-05	2.7e-05	0	0.00135086	0.000106988	0.000143061	3.48e-05	7.2e-06	0	0.000107813	6.62e-06	2.76e-05
Veillonella_dispar	6.2e-05	6.81e-06	0	0.000541794	0.00214991	1.3e-05	0.000155093	0	0	5.97e-05	5.37e-05	1.59e-05	0.000389256	0	0.000188754	0	0.000304325	0.000242922	0.000303822	0	4.51e-05	0.000106515	0.000352939	0	0	8.38e-06	0	0.000360537	0	0.000137751	0.00027235	3.08e-05	0	0	0.000370902	9.67e-05	0	7.77e-06	9.38e-06	0	5.43e-05	3.12e-05	4.08e-05
Treponema_medium	5.95e-05	1.29e-05	2.86e-06	1.51e-05	2.8e-05	4.25e-06	5.86e-05	0	1.34e-05	0	0.000132148	0.000102832	6.73e-05	0	0.000266718	0	0.000146827	0.000159077	0.00273181	0	1.93e-05	0	0.00010407	0	0.000107784	1.79e-05	0	8.23e-05	5.38e-05	0	0.00192961	3.94e-06	1.77e-05	8.28e-06	1.38e-05	3.44e-05	0	9.35e-06	0	0	2.13e-05	0	7.87e-05
Streptococcus_mutans	0.000239968	3.3e-05	1.73e-06	0.00010343	0.000104581	5.24e-06	0.000940947	0	9.72e-06	1.26e-05	8.94e-05	2.39e-05	0.000307447	0	9.44e-05	0	0.00136493	3.2e-05	0.000288293	0	0.000127688	0	1.18e-05	0	0.000953669	8.77e-05	0	0.000158083	0.000119459	3.1e-05	0.000341667	1.05e-05	7.2e-05	0	0.000160084	0.00013929	0.000176994	1.9e-05	6.25e-06	0	1.43e-05	3.92e-06	5.92e-05
Veillonella_atypica	0.000235469	5.1e-06	1.96e-06	0.000457926	0.00067836	1.36e-05	9.05e-05	0	6.23e-06	0.000111478	0.000252373	1.12e-05	0.000963904	0	0.000315958	0	0.000335135	6.93e-05	0.00027334	0	3.87e-05	4.89e-05	8.16e-05	0	2.16e-05	9.26e-05	0	0.000192753	6.97e-05	0.000282751	0.00103579	2.31e-05	2.02e-05	9.23e-06	0.000144752	0.000115835	5.66e-06	5.93e-06	5.44e-06	0	2.25e-05	7.66e-06	1.22e-05
Acinetobacter_baumannii	0	0.000129317	6.02e-06	3.92e-06	0	4.06e-05	0	0	1.66e-05	0	0	0	0	5.54e-05	0	0	9.71e-06	8.06e-06	0	0	0.00107954	0	2.55e-05	0	0.000809671	0.000236041	0.000343976	0.000236226	0.000430054	0.000288683	0.000519479	0.00028148	6.54e-05	0.000100536	0	0	0.000160656	8.03e-05	0.000262083	0.000481628	0.000136956	0.000133428	7.51e-05
Schleiferilactobacillus_harbinensis	0	2.69e-05	9.56e-06	3.35e-06	1.85e-06	5.8e-06	0	0	1.52e-06	0	0	0	0	1.5e-05	2.67e-05	4.55e-05	2.46e-05	7.16e-06	0	7.3e-05	0.00503657	0	4.07e-06	5.95e-06	0	1.42e-05	0	5.57e-06	0	0	3.33e-06	3.38e-06	0	2.84e-06	1.61e-05	3.35e-05	0.00050082	0	0	0	0	1.31e-06	1.93e-06
Prevotella_nigrescens	0.000315958	2.86e-05	1.13e-06	8.42e-05	0.000294606	1.76e-05	0.000188486	0	2.37e-05	0.000910143	0.000184809	3.99e-05	0.000424883	0	0.000258511	0	0.000497928	0.000123927	0.00064503	9.26e-06	6.58e-05	2.07e-05	0.000150384	0	5.69e-05	6.01e-06	0	0.000298561	0.000117468	8.24e-05	0.000338336	3.94e-06	1.87e-05	8.75e-06	0.000139556	0.000241546	6.28e-06	7.38e-06	3.07e-05	0	4.55e-05	6.36e-06	0.000130014
Pseudomonas_sp._CIP-10	0.000569425	0.000148714	0	0	0	0	0	0	0	0.000144974	0	0	0	0	0	0	0	0	0.000105971	0	0	0	0.00395966	0	0	0	0.000203055	0	0	0	0.000233488	0	0	0	3.97e-05	0	0.000383522	0	0	0	0	0	0
Comamonas_thiooxydans	0	2.14e-05	0	0	0	1.63e-05	0	0	0	0	0	0	0	0	0	0	0	0	0	0	0.000840933	0	0	0	0.000499254	9.79e-05	0.000722541	0.000133293	0.000284711	0.000419843	0.00127197	0.000283357	3.17e-05	5.98e-05	0	0	0.000145994	3.16e-05	0.000409301	0.000196709	0.000155814	5.5e-05	3.72e-05
Streptococcus_sp._HSISS3	0.000163978	0	0	0.000394781	0.000288432	0	0	0	9.27e-06	6.7e-05	0	2.99e-05	0.000110839	0	8.41e-05	0	0.000473377	0.000182556	0.000351416	0	0	6.04e-05	3.96e-05	0	9.74e-05	0.000155253	0	0.000365567	0	0.000240569	0.000548507	6.33e-05	2.43e-05	0	0.00156094	9.59e-05	5.45e-05	0	8.97e-06	0	5.37e-05	0	2.37e-05
Neisseria_cinerea	0	0	1.51e-06	0.000480838	0.000222868	0	4.45e-05	0	0	2.36e-05	0.000105321	0.000130732	3.43e-05	0	0	0	1.02e-05	0.000329546	0.00293455	0	0	0	0.000212913	0	0	0	0	0.000115688	0	0	1.95e-05	0	0	0	0.000217396	0	0	0	0	4.76e-05	2.78e-05	0	0.000480218
Fusobacterium_sp._oral_taxon_203	0.00232669	0	0	2.94e-05	3.63e-05	0	9.94e-05	0	2.19e-05	4.29e-05	7.05e-05	0	1.65e-05	0	0	0	7.3e-06	1.59e-05	0.00180712	0	0	1.11e-05	0.000637763	0	0	0	0	2.77e-05	0	0	0.000141965	0	0	0	1.95e-05	9.67e-06	7.69e-05	5.4e-06	0	0	2.17e-05	0	1.11e-05
Leptotrichia_wadei	0.000172477	0	0	0.000148337	1.17e-05	1.13e-05	0	0	2.28e-06	5.02e-05	0.000446124	9.57e-06	0.00335684	0	0.000262614	0	3.97e-05	3.98e-05	0.000312737	0	0	0	4.17e-05	0	0	5.22e-06	0	2.62e-05	0	2.7e-05	0.000117379	7.14e-06	1.3e-05	0	1.51e-05	1.83e-05	0	0	0	0	6.1e-06	0.000131164	1.2e-05
Corynebacterium_striatum	7.8e-05	2.89e-05	0	2.24e-05	1.07e-05	0	0.000134315	0	0	0.000122469	2.68e-05	7.97e-06	0.00021574	0	9.85e-05	0	0	0.000158868	0.000135448	0	9.16e-05	3.97e-05	0.000223434	9.25e-05	0	0.000696265	2.56e-06	8.21e-05	7.57e-05	3.23e-05	0	3.57e-06	0.00163897	0	0.000541917	4.32e-06	0.000561563	0.000106283	0	0	4.38e-06	2.63e-05	2.9e-06
Citrobacter_koseri	0	0	0	0	0	0	0	0	0	0	0	5.46e-05	0	0	0	0	0	0	0	0	0	0	0	0	0	0	0	0	0	0	0	0	0.00518048	0	0	0	0	0	0	0	0	0	0
Treponema_sp._OMZ_305	3.45e-05	0	0	1.59e-05	1.63e-05	0	7.64e-05	0	9.57e-06	0	0.000142084	3.15e-05	4.62e-05	0	0.000182599	0	5.26e-05	0.000115313	0.00263504	0	0	0	0.000106402	0	9.05e-05	1.63e-05	0	9.2e-05	0	0	0.00139332	8.64e-06	1.13e-05	0	1.24e-05	4.36e-05	0	7.38e-06	0	0	2.1e-05	0	7.32e-05
Capnocytophaga_sputigena	1.9e-05	0	0	0.000615827	8.14e-05	0	0.00026492	0	1.11e-05	1.83e-05	6.66e-05	1.59e-05	0.000773235	0	9.44e-05	0	3.95e-05	0.000417698	0.00110112	0	2.97e-05	3.87e-05	0.00118539	0	2.16e-05	5.69e-06	0	3.65e-05	0.000145342	0	8.88e-06	3.76e-06	5.66e-06	0	4.45e-05	0	0	0	0	0	2.7e-05	2.26e-06	0.000129048
Fusobacterium_canifelinum	0.003793	0	0	2.47e-05	2.86e-05	0	7.87e-05	0	4.86e-06	4.97e-05	2.29e-05	1.67e-05	4.68e-05	0	0	0	0	1.69e-05	0.00076883	0	0	0	7.9e-05	0	1.98e-05	0	0	3e-05	0	0	0.000116427	0	0	0	1.04e-05	7e-06	6.07e-06	4.61e-06	0	0	2.48e-05	0	2.56e-05
Lacticaseibacillus_rhamnosus	0	8.85e-06	4.89e-06	1.08e-06	1.73e-06	0	0	0	0	0	0	0	0	9.86e-06	4.51e-05	1.78e-05	9.71e-06	3.82e-06	0	4.28e-05	0.00430011	0	1.74e-06	0	0	0	0	0	0	0	3.33e-06	6.95e-06	0	0	1.33e-05	3.56e-05	0.000557164	0	0	0	0	2.18e-06	0
Treponema_sp._OMZ_906	6.05e-05	0	0	1.72e-05	2.16e-05	0	6.16e-05	0	1.05e-05	7.01e-05	0.000197725	0	8.05e-05	0	0.000244149	0	4.65e-05	0.000133235	0.00228694	0	0	0	9.6e-05	0	7.85e-05	1.52e-05	0	9.05e-05	0	0	0.0013838	0	0	0	1.8e-05	3.74e-05	0	0	0	0	2.74e-05	0	7.44e-05
Morococcus_cerebrosus	0	9.53e-06	7.61e-06	0.000471895	0.000317696	0	0.000812568	0	1.55e-05	1.62e-05	6.66e-05	0	4.55e-05	0	5.13e-05	0	0.000315237	0.000210551	0.000741942	0	0	0	0.000476587	0	0	0	0	8.62e-05	0	0	5.41e-05	0	0.000122689	0	0.000202525	0	8.38e-06	0	0	0	3.79e-05	0	0.000940397
Aggregatibacter_sp._oral_taxon_513	2.8e-05	1.57e-05	5.27e-06	4.72e-05	5.56e-06	0	7.94e-05	0	2.05e-05	4.29e-05	4.37e-05	5.86e-05	0.000154383	0	0.000100532	0	2.25e-05	0.00010142	0.00329963	0	0	1.89e-05	0.000124136	0	2.41e-05	0	0	4.44e-05	0.000125432	8.37e-05	0.000166233	0	1.7e-05	0	0.000185323	0	0	0	0	0	1.45e-05	0	0.000105749
Bulleidia_sp._zg-1006	0.000549427	3.03e-05	3.09e-06	0.000186812	0.000403262	7.93e-06	9.13e-05	0	2.28e-06	0.000204638	0.000148046	1.51e-05	0.000174835	0	0.000309803	0	0.00029213	4.91e-05	0.00022589	0	0	1.01e-05	4.71e-05	0	7.07e-05	0	0	0.000195448	4.38e-05	8.57e-05	9.04e-05	2.63e-06	8.61e-06	0	0.000802163	0.000343596	0.000329062	0.000128541	2.31e-05	0	9.91e-06	0	3.51e-05
Veillonella_sp._S12025-13	2.8e-05	0	0	0.000272302	0.0007054	6.94e-06	0.000221879	0	0	3.35e-05	6.46e-05	2.19e-05	0.000117437	0	7.18e-05	0	0.000236367	0.000370739	0.000459113	0	0	3.83e-05	0.000528757	0	0	5.85e-06	0	0.000354789	0	9.29e-05	0.000484583	5.82e-06	0	0	0.000559912	3.46e-05	0	0	0	0	6.72e-05	1.55e-05	6.86e-05
Acinetobacter_johnsonii	0	0.000116725	3.92e-06	1.22e-06	0	1.92e-05	0	0	8.97e-06	0	9.54e-05	0	0	7.62e-05	0	8.32e-05	3.05e-06	0	0	4.81e-05	0.0010589	0	1.34e-05	0	0.000472523	0.000100393	0.000235338	0.00010455	0.000334486	0.000272865	0.000592762	0.000220264	2.9e-05	9.94e-05	2.23e-06	0	0.000114365	2.81e-05	0.000224973	0.000240814	8.08e-05	0.000132645	3.15e-05
Bifidobacterium_dentium	0.000594921	0	0	3.57e-06	1.62e-05	0	0	0	0	0	9.94e-06	0	2.84e-05	0	0.000221581	0	5.17e-05	0.000106491	0	0	0	0	6.18e-06	0	0	2.2e-05	0	0.000296585	0	0	0.00126626	3e-05	3.47e-05	0	0.00196038	6.52e-05	0	1.62e-05	0	0	3.43e-06	4.79e-06	2.56e-05
Paraburkholderia_fungorum	0	4.53e-05	1.3e-05	6.24e-06	1.31e-05	1.57e-05	0	0.000168426	5.08e-05	1.2e-05	2.29e-05	7.57e-06	5.41e-05	2.69e-05	0	2.27e-05	1.24e-05	4.86e-06	0	2.89e-05	0.00421885	0	6.62e-06	0	0	0	0	0	0	0	0	0	0	0	1.41e-06	4.32e-06	2.16e-05	0	0	0	0	0	0
Sphingobium_sp._PAMC28499	0	0.000125233	0	0	0	2.53e-05	0	0	7.6e-06	0	0	0	0	0	0	0	0	2.92e-06	0	3.94e-05	0.00189468	0	0	0	0.000551852	0.000162999	9.88e-05	0.000186466	0.000274757	0.000133796	0.00018733	0.000123183	8.38e-05	0.000160857	9.73e-07	0	4.4e-05	5.85e-05	6.29e-05	0.000314911	7.73e-05	4.16e-05	6.64e-05
Acetobacter_pasteurianus	0	4.73e-05	1.22e-05	3.86e-06	6.91e-06	1.29e-05	0	0	0	0	0	0	0	1.9e-05	0	7.93e-05	1.52e-05	1.79e-05	0	0.000166743	0.00363846	0	1.05e-05	0	0	0	3.84e-06	1.24e-05	0	0	5.71e-06	0	0	5.2e-06	5.95e-05	9.63e-05	0.000485739	0	0	0	0	7.4e-06	4.59e-06
Corynebacterium_simulans	0	0	0	1.89e-06	0	0	0	0	0	1.26e-05	3.58e-05	0	0	0	0.00135205	0	0	1.29e-05	1.57e-05	0	0	1.01e-05	4.15e-05	9.62e-06	0	5.03e-05	0	4.02e-05	0	1.65e-05	0	0	0.00278497	0	0.000262473	0	5.19e-05	0	0	0	0	0	0
Capnocytophaga_gingivalis	1.6e-05	7.49e-06	2.56e-06	0.000493564	3.46e-05	3.68e-06	0.00025082	0	7.45e-06	4.45e-05	3.38e-05	1.32e-05	0.000659097	0	0.000118997	0	3.27e-05	0.000518214	0.00110831	0	0	3.32e-05	0.000810653	0	0	1.28e-05	0	4.72e-05	5.18e-05	0	1.08e-05	0	6.88e-06	0	2.03e-05	0	2.51e-06	0	0	0	5.94e-05	6.79e-06	0.000289242
Gemella_sp._oral_taxon_928	0.00168928	0	0	0.000118696	4.83e-05	0	8.01e-05	0	0	0.000192601	0.000454073	0	0	0	0	0	0.000305529	0.000111284	0.000205903	0	0	0	1.51e-05	0	0.000185388	0	0	9.84e-05	0	0	6.27e-05	0	0	0	6.06e-05	0.00102132	0	0	0	0	0	0	4.56e-05
Limosilactobacillus_mucosae	0	0	0	3.01e-05	0	0	0	0	0	0	0	0	1.78e-05	0	7.8e-05	0	0.00037838	0	0	0	0	0	0	0	0	0.0032222	0	0	0	0	0.000100406	0	0	0	0	0	0	0.000856191	0	0	0	0	0
Prevotella_oris	0.000281463	1.94e-05	0	9.86e-05	0.000108162	1.1e-05	0.000183292	0	9.18e-05	4.19e-05	0.000205674	3.43e-05	0.000693404	0	0.000227736	0	0.00044706	2.37e-05	0.000619579	0	6.06e-05	1.8e-05	0.000161122	0	4.05e-05	3.95e-06	0	0.000380118	7.96e-05	3.49e-05	0.000226667	1.05e-05	1.13e-05	6.15e-06	0.000136996	9.4e-05	2.93e-06	2.13e-05	1.29e-05	0	6.1e-05	0	0.00010913
Streptococcus_sp._FDAARGOS_522	0	0	0	0.000613774	0.000861223	0	0	0	0	0	0	0	0	0	0	0	0	0.000313916	0	0	0	0	9.62e-05	0	0	0	0	0.00157293	0	0	0	0	0	0	0.00102074	0	0	0	0	0	0	0	0
Treponema_sp._OMZ_803	5.05e-05	0	0	1.04e-05	1.33e-05	0	3.19e-05	0	1.4e-05	3.35e-05	9.74e-05	0	5.28e-05	0	0.000149772	0	4.45e-05	0.000111284	0.00211698	0	0	0	7.47e-05	0	7.07e-05	1.01e-05	0	7.83e-05	0	0	0.00133494	1.2e-05	1.7e-05	0	9.7e-06	3.62e-05	0	0	0	0	2.78e-05	0	6.69e-05

## Sheet: TableS4
Sample	Classfied	Unclassfied
H24	0.91	0.09
H25	0.99	0.01
H26	1	0.00
H27	0.91	0.09
H28	0.77	0.23
H30	1	0.00
H31	0.97	0.03
H32	1	0.00
H33	1	0.00
H34	0.98	0.02
H35	0.98	0.02
H36	0.99	0.01
H37	0.94	0.06
H50	1	0.00
H51	0.99	0.01
H54	1	0.00
H56	0.98	0.02
H57	0.98	0.02
H58	0.83	0.17
H59	1	0.00
H64	0.89	0.11
H65	0.99	0.01
H66	0.93	0.07
H67	0.99	0.01
H11	0.98	0.02
H12	1.00	0.00
H13	1.00	0.00
H14	0.94	0.06
H15	0.99	0.01
H16	0.97	0.03
H18	0.92	0.08
H20	0.99	0.01
H22	0.99	0.01
H3	1	0.00
H4	1	0.00
H40	0.76	0.24
H41	0.98	0.02
H44	0.96	0.04
H5	1	0.00
H6	1	0.00
H7	0.99	0.01
H8	1	0.00
H9	0.98	0.02

## Sheet: TableS5
newname	user_genome	user_genome	classification	fastani_reference	fastani_reference_radius	fastani_taxonomy	fastani_ani	fastani_af	closest_placement_reference	closest_placement_radius	closest_placement_taxonomy	closest_placement_ani	closest_placement_af	pplacer_taxonomy	classification_method	note	other_related_references(genome_id,species_name,radius,ANI,AF)	msa_percent	translation_table	red_value	warnings
MAG1	bin.0.2021-SN-26	bin.0.2021-SN-26	d__Bacteria;p__Actinobacteriota;c__Actinomycetia;o__Actinomycetales;f__Microbacteriaceae;g__Tropheryma;s__Tropheryma whipplei	GCF_000007485.1	95	d__Bacteria;p__Actinobacteriota;c__Actinomycetia;o__Actinomycetales;f__Microbacteriaceae;g__Tropheryma;s__Tropheryma whipplei	99.55	0.99	GCF_000007485.1	95	d__Bacteria;p__Actinobacteriota;c__Actinomycetia;o__Actinomycetales;f__Microbacteriaceae;g__Tropheryma;s__Tropheryma whipplei	99.55	0.99	d__Bacteria;p__Actinobacteriota;c__Actinomycetia;o__Actinomycetales;f__Microbacteriaceae;g__;s__	taxonomic classification defined by topology and ANI	topological placement and ANI have congruent species assignments	N/A	86.81	11	N/A	N/A
MAG10	concoct.191	concoct.191	d__Bacteria;p__Spirochaetota;c__Spirochaetia;o__Treponematales;f__Treponemataceae;g__Treponema_D;s__Treponema_D sp905372235	GCA_905372235.1	95	d__Bacteria;p__Spirochaetota;c__Spirochaetia;o__Treponematales;f__Treponemataceae;g__Treponema_D;s__Treponema_D sp905372235	96.87	0.94	GCA_905372235.1	95	d__Bacteria;p__Spirochaetota;c__Spirochaetia;o__Treponematales;f__Treponemataceae;g__Treponema_D;s__Treponema_D sp905372235	96.87	0.94	d__Bacteria;p__Spirochaetota;c__Spirochaetia;o__Treponematales;f__Treponemataceae;g__Treponema_D;s__	taxonomic classification defined by topology and ANI	topological placement and ANI have congruent species assignments	GCF_014334335.1, s__Treponema_D sp014334335, 95.0, 78.3, 0.07; GCA_017386165.1, s__Treponema_D sp017386165, 95.0, 78.13, 0.04; GCF_017893965.1, s__Treponema_D parvum, 95.0, 78.0, 0.03; GCF_017893945.1, s__Treponema_D parvum_A, 95.0, 77.89, 0.04; GCA_002437725.1, s__Treponema_D sp002437725, 95.0, 77.88, 0.12; GCA_016293915.1, s__Treponema_D sp016293915, 95.0, 77.52, 0.04; GCA_000413015.1, s__Trepo…	63.05	11	N/A	N/A
MAG11	concoct.22	concoct.22	d__Bacteria;p__Actinobacteriota;c__Actinomycetia;o__Actinomycetales;f__Bifidobacteriaceae;g__Bifidobacterium;s__Bifidobacterium dentium	GCF_001042595.1	95	d__Bacteria;p__Actinobacteriota;c__Actinomycetia;o__Actinomycetales;f__Bifidobacteriaceae;g__Bifidobacterium;s__Bifidobacterium dentium	98.55	0.92	GCF_001042595.1	95	d__Bacteria;p__Actinobacteriota;c__Actinomycetia;o__Actinomycetales;f__Bifidobacteriaceae;g__Bifidobacterium;s__Bifidobacterium dentium	98.55	0.92	d__Bacteria;p__Actinobacteriota;c__Actinomycetia;o__Actinomycetales;f__Bifidobacteriaceae;g__Bifidobacterium;s__	taxonomic classification defined by topology and ANI	topological placement and ANI have congruent species assignments	GCF_000522505.1, s__Bifidobacterium moukalabense, 95.0, 89.43, 0.89; GCF_000010425.1, s__Bifidobacterium adolescentis, 95.0, 82.9, 0.62; GCA_002451435.1, s__Bifidobacterium sp002451435, 95.0, 82.71, 0.5; GCF_000770925.1, s__Bifidobacterium ruminantium, 95.0, 82.46, 0.58; GCF_001025195.1, s__Bifidobacterium catenulatum, 96.3948, 82.38, 0.55; GCF_002742445.1, s__Bifidobacterium sp002742445, 95.0, 8…	75.5	11	N/A	N/A
MAG12	concoct.48	concoct.48	d__Bacteria;p__Firmicutes;c__Bacilli;o__Erysipelotrichales;f__Erysipelotrichaceae;g__Bulleidia;s__Bulleidia extructa	GCF_000177375.1	95	d__Bacteria;p__Firmicutes;c__Bacilli;o__Erysipelotrichales;f__Erysipelotrichaceae;g__Bulleidia;s__Bulleidia extructa	98.94	0.94	GCF_000177375.1	95	d__Bacteria;p__Firmicutes;c__Bacilli;o__Erysipelotrichales;f__Erysipelotrichaceae;g__Bulleidia;s__Bulleidia extructa	98.94	0.94	d__Bacteria;p__Firmicutes;c__Bacilli;o__Erysipelotrichales;f__Erysipelotrichaceae;g__Bulleidia;s__	taxonomic classification defined by topology and ANI	topological placement and ANI have congruent species assignments	GCF_016812035.1, s__Bulleidia sp016812035, 95.0, 80.21, 0.64; GCA_016293365.1, s__Bulleidia sp016293365, 95.0, 78.6, 0.02; GCA_017536845.1, s__Bulleidia sp017536845, 95.0, 78.32, 0.01; GCA_902793635.1, s__Bulleidia sp902793635, 95.0, 78.09, 0.03; GCA_017459725.1, s__Bulleidia sp017459725, 95.0, 78.0, 0.02; GCF_900240265.1, s__Bulleidia timonensis, 95.0, 77.93, 0.02; GCA_017404505.1, s__Bulleidia …	91.08	11	N/A	N/A
MAG13	concoct.75	concoct.75	d__Bacteria;p__Firmicutes_A;c__Clostridia;o__Peptostreptococcales;f__Filifactoraceae;g__Filifactor;s__Filifactor alocis	GCF_000163895.2	95	d__Bacteria;p__Firmicutes_A;c__Clostridia;o__Peptostreptococcales;f__Filifactoraceae;g__Filifactor;s__Filifactor alocis	97.97	0.93	GCF_000163895.2	95	d__Bacteria;p__Firmicutes_A;c__Clostridia;o__Peptostreptococcales;f__Filifactoraceae;g__Filifactor;s__Filifactor alocis	97.97	0.93	d__Bacteria;p__Firmicutes_A;c__Clostridia;o__Peptostreptococcales;f__Filifactoraceae;g__;s__	taxonomic classification defined by topology and ANI	topological placement and ANI have congruent species assignments	N/A	74.64	11	N/A	N/A
MAG14	concoct.83	concoct.83	d__Bacteria;p__Actinobacteriota;c__Actinomycetia;o__Actinomycetales;f__Bifidobacteriaceae;g__Scardovia;s__Scardovia wiggsiae	GCF_000269605.1	95	d__Bacteria;p__Actinobacteriota;c__Actinomycetia;o__Actinomycetales;f__Bifidobacteriaceae;g__Scardovia;s__Scardovia wiggsiae	96.52	0.96	GCF_000269605.1	95	d__Bacteria;p__Actinobacteriota;c__Actinomycetia;o__Actinomycetales;f__Bifidobacteriaceae;g__Scardovia;s__Scardovia wiggsiae	96.52	0.96	d__Bacteria;p__Actinobacteriota;c__Actinomycetia;o__Actinomycetales;f__Bifidobacteriaceae;g__Scardovia;s__	taxonomic classification defined by topology and ANI	topological placement and ANI have congruent species assignments	GCF_001042695.1, s__Scardovia inopinata, 95.0, 78.27, 0.12	84.25	11	N/A	N/A
MAG15	concoct.85	concoct.85	d__Bacteria;p__Bacteroidota;c__Bacteroidia;o__Bacteroidales;f__Porphyromonadaceae;g__Porphyromonas;s__Porphyromonas endodontalis	GCF_000174815.1	95	d__Bacteria;p__Bacteroidota;c__Bacteroidia;o__Bacteroidales;f__Porphyromonadaceae;g__Porphyromonas;s__Porphyromonas endodontalis	96.71	0.91	GCF_000174815.1	95	d__Bacteria;p__Bacteroidota;c__Bacteroidia;o__Bacteroidales;f__Porphyromonadaceae;g__Porphyromonas;s__Porphyromonas endodontalis	96.71	0.91	d__Bacteria;p__Bacteroidota;c__Bacteroidia;o__Bacteroidales;f__Porphyromonadaceae;g__Porphyromonas;s__	taxonomic classification defined by topology and ANI	topological placement and ANI have congruent species assignments	GCA_905372565.1, s__Porphyromonas sp905372565, 95.0, 84.11, 0.01; GCA_900548415.1, s__Porphyromonas sp900548415, 95.0, 84.06, 0.01; GCF_000769075.1, s__Porphyromonas sp000769075, 95.0, 79.41, 0.02; GCF_000565015.1, s__Porphyromonas catoniae, 95.0, 79.41, 0.04; GCF_014647755.1, s__Porphyromonas pasteri, 95.0, 79.15, 0.05; GCF_000010505.1, s__Porphyromonas gingivalis, 95.0, 79.0, 0.03; GCF_01812774…	66.16	11	N/A	N/A
MAG16	maxbin_bin.0.SN-9	maxbin_bin.0.SN-9	d__Bacteria;p__Proteobacteria;c__Gammaproteobacteria;o__Burkholderiales;f__Neisseriaceae;g__Neisseria;s__Neisseria flavescens_B	GCF_001618015.1	95.1594	d__Bacteria;p__Proteobacteria;c__Gammaproteobacteria;o__Burkholderiales;f__Neisseriaceae;g__Neisseria;s__Neisseria flavescens_B	95.75	0.89	GCF_003045025.1	95.3115	d__Bacteria;p__Proteobacteria;c__Gammaproteobacteria;o__Burkholderiales;f__Neisseriaceae;g__Neisseria;s__Neisseria subflava_A	95.16	0.86	d__Bacteria;p__Proteobacteria;c__Gammaproteobacteria;o__Burkholderiales;f__Neisseriaceae;g__Neisseria;s__	ANI	topological placement and ANI have incongruent species assignments	GCF_005221305.1, s__Neisseria subflava, 95.1594, 95.2, 0.85; GCF_003351665.1, s__Neisseria perflava, 95.6726, 95.13, 0.88; GCF_001618065.1, s__Neisseria flavescens_A, 95.6469, 95.0, 0.86; GCF_003044645.1, s__Neisseria subflava_B, 95.654, 94.96, 0.86; GCF_001618085.1, s__Neisseria flavescens_C, 95.4709, 94.91, 0.85; GCF_900654165.1, s__Neisseria subflava_C, 95.6726, 94.86, 0.89; GCF_005221285.1, s…	98.47	11	N/A	N/A
MAG17	maxbin_bin.10.SN-22	maxbin_bin.10.SN-22	d__Bacteria;p__Firmicutes;c__Bacilli;o__Lactobacillales;f__Carnobacteriaceae;g__Dolosigranulum;s__Dolosigranulum pigrum	GCF_000245815.1	95	d__Bacteria;p__Firmicutes;c__Bacilli;o__Lactobacillales;f__Carnobacteriaceae;g__Dolosigranulum;s__Dolosigranulum pigrum	97.39	0.97	GCF_000245815.1	95	d__Bacteria;p__Firmicutes;c__Bacilli;o__Lactobacillales;f__Carnobacteriaceae;g__Dolosigranulum;s__Dolosigranulum pigrum	97.39	0.97	d__Bacteria;p__Firmicutes;c__Bacilli;o__Lactobacillales;f__Carnobacteriaceae;g__;s__	taxonomic classification defined by topology and ANI	topological placement and ANI have congruent species assignments	N/A	69.46	11	N/A	N/A
MAG18	maxbin_bin.14.2021-SN-58	maxbin_bin.14.2021-SN-58	d__Bacteria;p__Patescibacteria;c__Saccharimonadia;o__Saccharimonadales;f__Nanosynbacteraceae;g__Nanosynbacter;s__Nanosynbacter sp007845355	GCA_007845355.1	95	d__Bacteria;p__Patescibacteria;c__Saccharimonadia;o__Saccharimonadales;f__Nanosynbacteraceae;g__Nanosynbacter;s__Nanosynbacter sp007845355	95.19	0.72	N/A	N/A	N/A	N/A	N/A	d__Bacteria;p__Patescibacteria;c__Saccharimonadia;o__Saccharimonadales;f__Nanosynbacteraceae;g__Nanosynbacter;s__	ANI	topological placement and ANI have incongruent species assignments	GCA_007845355.1, s__Nanosynbacter sp007845355, 95.0, 95.19, 0.72; GCA_905370345.1, s__Nanosynbacter sp905370345, 95.0, 95.06, 0.82; GCA_900556355.1, s__Nanosynbacter sp900556355, 95.0, 94.76, 0.88; GCA_900555425.1, s__Nanosynbacter sp900555425, 95.0, 94.31, 0.77; GCA_900557595.1, s__Nanosynbacter sp900557595, 95.0, 93.98, 0.85; GCA_900556885.1, s__Nanosynbacter sp900556885, 95.0, 93.96, 0.85; GCA…	66.74	11	N/A	N/A
MAG19	maxbin_bin.27.2021-SN-28	maxbin_bin.27.2021-SN-28	d__Bacteria;p__Actinobacteriota;c__Actinomycetia;o__Actinomycetales;f__Actinomycetaceae;g__Actinomyces;s__Actinomyces graevenitzii	GCF_000239695.1	95	d__Bacteria;p__Actinobacteriota;c__Actinomycetia;o__Actinomycetales;f__Actinomycetaceae;g__Actinomyces;s__Actinomyces graevenitzii	95.88	0.97	GCF_000239695.1	95	d__Bacteria;p__Actinobacteriota;c__Actinomycetia;o__Actinomycetales;f__Actinomycetaceae;g__Actinomyces;s__Actinomyces graevenitzii	95.88	0.97	d__Bacteria;p__Actinobacteriota;c__Actinomycetia;o__Actinomycetales;f__Actinomycetaceae;g__Actinomyces;s__	taxonomic classification defined by topology and ANI	topological placement and ANI have congruent species assignments	GCF_016598775.1, s__Actinomyces weissii, 95.0, 78.24, 0.19; GCF_001956585.1, s__Actinomyces naeslundii, 95.0, 78.21, 0.18; GCA_900444995.1, s__Actinomyces bovis, 95.0, 78.19, 0.15; GCF_900103885.1, s__Actinomyces ruminicola, 95.0, 78.16, 0.19; GCF_001937665.1, s__Actinomyces oris_D, 95.0, 78.15, 0.18; GCF_015711475.1, s__Actinomyces sp015711475, 95.0, 78.1, 0.17; GCF_013184985.2, s__Actinomyces s…	96.33	11	N/A	N/A
MAG2	concoct.114	concoct.114	d__Bacteria;p__Campylobacterota;c__Campylobacteria;o__Campylobacterales;f__Campylobacteraceae;g__Campylobacter_A;s__Campylobacter_A rectus	GCF_004803795.1	95	d__Bacteria;p__Campylobacterota;c__Campylobacteria;o__Campylobacterales;f__Campylobacteraceae;g__Campylobacter_A;s__Campylobacter_A rectus	98.07	0.98	GCF_004803795.1	95	d__Bacteria;p__Campylobacterota;c__Campylobacteria;o__Campylobacterales;f__Campylobacteraceae;g__Campylobacter_A;s__Campylobacter_A rectus	98.07	0.98	d__Bacteria;p__Campylobacterota;c__Campylobacteria;o__Campylobacterales;f__Campylobacteraceae;g__Campylobacter_A;s__	taxonomic classification defined by topology and ANI	topological placement and ANI have congruent species assignments	GCF_900699785.1, s__Campylobacter_A showae_D, 95.0, 89.85, 0.82; GCF_014253065.1, s__Campylobacter_A sp014253065, 95.0, 89.79, 0.84; GCF_900573985.1, s__Campylobacter_A showae_E, 95.0, 89.14, 0.9; GCF_000344295.2, s__Campylobacter_A showae_B, 95.0, 89.02, 0.82; GCF_004803815.1, s__Campylobacter_A showae, 95.0, 88.78, 0.84; GCA_905372745.1, s__Campylobacter_A sp905372745, 95.0, 88.36, 0.71; GCF_00…	52.5	11	N/A	N/A
MAG20	maxbin_bin.37.2021-SN-58	maxbin_bin.37.2021-SN-58	d__Bacteria;p__Patescibacteria;c__Saccharimonadia;o__Saccharimonadales;f__;g__;s__	N/A	N/A	N/A	N/A	N/A	N/A	N/A	N/A	N/A	N/A	d__Bacteria;p__Patescibacteria;c__Saccharimonadia;o__Saccharimonadales;f__;g__;s__	taxonomic classification fully defined by topology	classification based on placement in class-level tree	N/A	51.71	11	0.746622	N/A
MAG21	maxbin_bin.4.SN-14	maxbin_bin.4.SN-14	d__Bacteria;p__Actinobacteriota;c__Actinomycetia;o__Actinomycetales;f__Micrococcaceae;g__Rothia;s__Rothia sp001808955	GCF_001808955.1	95	d__Bacteria;p__Actinobacteriota;c__Actinomycetia;o__Actinomycetales;f__Micrococcaceae;g__Rothia;s__Rothia sp001808955	95.97	0.94	N/A	N/A	N/A	N/A	N/A	d__Bacteria;p__Actinobacteriota;c__Actinomycetia;o__Actinomycetales;f__Micrococcaceae;g__Rothia;s__	ANI	topological placement and ANI have incongruent species assignments	GCF_001808955.1, s__Rothia sp001808955, 95.0, 95.97, 0.94; GCF_000175615.1, s__Rothia mucilaginosa, 95.0, 95.03, 0.93; GCF_001548235.1, s__Rothia mucilaginosa_B, 95.0, 94.88, 0.94; GCA_015265375.1, s__Rothia sp015265375, 95.0, 94.48, 0.86; GCF_001061665.1, s__Rothia mucilaginosa_A, 95.0, 89.21, 0.85; GCF_901875305.1, s__Rothia sp902373285, 95.0, 87.96, 0.85; GCA_002355935.1, s__Rothia aeria, 95.0…	89.99	11	N/A	N/A
MAG22	maxbin_bin.4.SN-22	maxbin_bin.4.SN-22	d__Bacteria;p__Actinobacteriota;c__Actinomycetia;o__Mycobacteriales;f__Mycobacteriaceae;g__Corynebacterium;s__Corynebacterium accolens	GCF_000159115.1	95	d__Bacteria;p__Actinobacteriota;c__Actinomycetia;o__Mycobacteriales;f__Mycobacteriaceae;g__Corynebacterium;s__Corynebacterium accolens	97.13	0.94	GCF_000159115.1	95	d__Bacteria;p__Actinobacteriota;c__Actinomycetia;o__Mycobacteriales;f__Mycobacteriaceae;g__Corynebacterium;s__Corynebacterium accolens	97.13	0.94	d__Bacteria;p__Actinobacteriota;c__Actinomycetia;o__Mycobacteriales;f__Mycobacteriaceae;g__Corynebacterium;s__	taxonomic classification defined by topology and ANI	topological placement and ANI have congruent species assignments	GCF_000478175.1, s__Corynebacterium sp000478175, 95.0, 93.53, 0.91; GCF_003688935.1, s__Corynebacterium macginleyi, 95.0, 87.98, 0.83; GCA_900539985.1, s__Corynebacterium sp900539985, 95.0, 81.69, 0.69; GCF_013408445.1, s__Corynebacterium tuberculostearicum, 96.3332, 81.69, 0.65; GCF_016894265.1, s__Corynebacterium tuberculostearicum_D, 95.1108, 81.66, 0.65; GCF_000175635.1, s__Corynebacterium tu…	96.07	11	N/A	N/A
MAG23	maxbin_bin.43.2021-SN-27	maxbin_bin.43.2021-SN-27	d__Bacteria;p__Bacteroidota;c__Bacteroidia;o__Bacteroidales;f__Porphyromonadaceae;g__Porphyromonas;s__Porphyromonas pasteri	GCF_014647755.1	95	d__Bacteria;p__Bacteroidota;c__Bacteroidia;o__Bacteroidales;f__Porphyromonadaceae;g__Porphyromonas;s__Porphyromonas pasteri	95.88	0.96	GCF_014647755.1	95	d__Bacteria;p__Bacteroidota;c__Bacteroidia;o__Bacteroidales;f__Porphyromonadaceae;g__Porphyromonas;s__Porphyromonas pasteri	95.88	0.96	d__Bacteria;p__Bacteroidota;c__Bacteroidia;o__Bacteroidales;f__Porphyromonadaceae;g__Porphyromonas;s__	taxonomic classification defined by topology and ANI	topological placement and ANI have congruent species assignments	GCF_000467855.2, s__Porphyromonas sp000467855, 95.0, 81.24, 0.69; GCF_018127745.1, s__Porphyromonas sp018127745, 95.0, 79.91, 0.51; GCF_000565015.1, s__Porphyromonas catoniae, 95.0, 79.78, 0.28; GCA_905372525.1, s__Porphyromonas sp905372525, 95.0, 79.64, 0.45; GCA_905372565.1, s__Porphyromonas sp905372565, 95.0, 79.34, 0.37; GCA_003640335.1, s__Porphyromonas sp003640335, 95.0, 78.94, 0.04; GCF_90…	81.2	11	N/A	N/A
MAG24	maxbin_bin.4_sub.2021-SN-24	maxbin_bin.4_sub.2021-SN-24	d__Bacteria;p__Firmicutes;c__Bacilli;o__Erysipelotrichales;f__Erysipelotrichaceae;g__Bulleidia;s__Bulleidia moorei	GCF_000425005.1	95	d__Bacteria;p__Firmicutes;c__Bacilli;o__Erysipelotrichales;f__Erysipelotrichaceae;g__Bulleidia;s__Bulleidia moorei	97.67	0.86	GCF_000425005.1	95	d__Bacteria;p__Firmicutes;c__Bacilli;o__Erysipelotrichales;f__Erysipelotrichaceae;g__Bulleidia;s__Bulleidia moorei	97.67	0.86	d__Bacteria;p__Firmicutes;c__Bacilli;o__Erysipelotrichales;f__Erysipelotrichaceae;g__Bulleidia;s__	taxonomic classification defined by topology and ANI	topological placement and ANI have congruent species assignments	GCA_900554555.1, s__Bulleidia sp900554555, 95.0, 90.77, 0.76; GCA_015256775.1, s__Bulleidia sp015256775, 95.0, 90.61, 0.81; GCA_015256455.1, s__Bulleidia sp015256455, 95.0, 88.93, 0.73; GCF_000177375.1, s__Bulleidia extructa, 95.0, 79.98, 0.07; GCA_016284975.1, s__Bulleidia sp016284975, 95.0, 78.85, 0.01; GCA_902775735.1, s__Bulleidia sp902775735, 95.0, 77.94, 0.04; GCA_902786245.1, s__Bulleidia …	78.26	11	N/A	N/A
MAG25	maxbin_bin.5.2021-SN-57	maxbin_bin.5.2021-SN-57	d__Bacteria;p__Firmicutes_A;c__Clostridia;o__Peptostreptococcales;f__Anaerovoracaceae;g__Eubacterium_B;s__	N/A	N/A	N/A	N/A	N/A	GCA_001189495.1	95	d__Bacteria;p__Firmicutes_A;c__Clostridia;o__Peptostreptococcales;f__Anaerovoracaceae;g__Eubacterium_B;s__Eubacterium_B sulci	93.99	0.84	d__Bacteria;p__Firmicutes_A;c__Clostridia;o__Peptostreptococcales;f__Anaerovoracaceae;g__Eubacterium_B;s__	taxonomic classification defined by topology and ANI	classification based on placement in class-level tree	GCA_900450455.1, s__Eubacterium_B infirmum, 95.0, 85.38, 0.79; GCA_902776725.1, s__Eubacterium_B sp902776725, 95.0, 77.59, 0.06; GCA_002472145.1, s__Eubacterium_B sp002472145, 95.0, 77.49, 0.03; GCA_902803185.1, s__Eubacterium_B sp902803185, 95.0, 77.11, 0.02; GCA_017437565.1, s__Eubacterium_B sp017437565, 95.0, 77.05, 0.02; GCA_905236895.1, s__Eubacterium_B sp905236895, 95.0, 76.86, 0.05; GCA_01…	94.58	11	0.994837	Genome not assigned to closest species as it falls outside its pre-defined ANI radius
MAG26	maxbin_bin.5.SN-22	maxbin_bin.5.SN-22	d__Bacteria;p__Actinobacteriota;c__Actinomycetia;o__Mycobacteriales;f__Mycobacteriaceae;g__Corynebacterium;s__Corynebacterium propinquum	GCF_000375525.1	95	d__Bacteria;p__Actinobacteriota;c__Actinomycetia;o__Mycobacteriales;f__Mycobacteriaceae;g__Corynebacterium;s__Corynebacterium propinquum	97.51	0.94	GCF_000375525.1	95	d__Bacteria;p__Actinobacteriota;c__Actinomycetia;o__Mycobacteriales;f__Mycobacteriaceae;g__Corynebacterium;s__Corynebacterium propinquum	97.51	0.94	d__Bacteria;p__Actinobacteriota;c__Actinomycetia;o__Mycobacteriales;f__Mycobacteriaceae;g__Corynebacterium;s__	taxonomic classification defined by topology and ANI	topological placement and ANI have congruent species assignments	GCF_000688415.1, s__Corynebacterium pseudodiphtheriticum, 95.0, 86.12, 0.76; GCF_001457455.1, s__Corynebacterium diphtheriae, 95.0, 78.74, 0.09; GCF_000478175.1, s__Corynebacterium sp000478175, 95.0, 78.56, 0.16; GCF_000159115.1, s__Corynebacterium accolens, 95.0, 78.37, 0.16; GCF_003688935.1, s__Corynebacterium macginleyi, 95.0, 78.34, 0.13; GCF_016894265.1, s__Corynebacterium tuberculostearicum…	96.7	11	N/A	N/A
MAG27	maxbin_bin.56.2021-SN-27	maxbin_bin.56.2021-SN-27	d__Bacteria;p__Patescibacteria;c__Saccharimonadia;o__Saccharimonadales;f__UBA10027;g__SDRW01;s__	N/A	N/A	N/A	N/A	N/A	GCA_013333595.2	95	d__Bacteria;p__Patescibacteria;c__Saccharimonadia;o__Saccharimonadales;f__UBA10027;g__SDRW01;s__SDRW01 sp013333595	93.56	0.82	d__Bacteria;p__Patescibacteria;c__Saccharimonadia;o__Saccharimonadales;f__UBA10027;g__SDRW01;s__	taxonomic classification defined by topology and ANI	classification based on placement in class-level tree	GCA_007845485.1, s__SDRW01 sp007845485, 95.0, 78.18, 0.1	71.64	11	0.989764	Genome not assigned to closest species as it falls outside its pre-defined ANI radius
MAG28	maxbin_bin.6.2021-SN-24	maxbin_bin.6.2021-SN-24	d__Bacteria;p__Firmicutes_A;c__Clostridia;o__Peptostreptococcales;f__Anaerovoracaceae;g__Mogibacterium;s__Mogibacterium timidum	GCF_000525775.1	95	d__Bacteria;p__Firmicutes_A;c__Clostridia;o__Peptostreptococcales;f__Anaerovoracaceae;g__Mogibacterium;s__Mogibacterium timidum	99.04	0.86	GCF_000525775.1	95	d__Bacteria;p__Firmicutes_A;c__Clostridia;o__Peptostreptococcales;f__Anaerovoracaceae;g__Mogibacterium;s__Mogibacterium timidum	99.04	0.86	d__Bacteria;p__Firmicutes_A;c__Clostridia;o__Peptostreptococcales;f__Anaerovoracaceae;g__Mogibacterium;s__	taxonomic classification defined by topology and ANI	topological placement and ANI have congruent species assignments	GCF_002243385.1, s__Mogibacterium pumilum, 95.0, 81.09, 0.44; GCF_002998925.1, s__Mogibacterium diversum, 95.0, 80.62, 0.36	70.93	11	N/A	N/A
MAG29	maxbin_bin.6.SN-22	maxbin_bin.6.SN-22	d__Bacteria;p__Proteobacteria;c__Gammaproteobacteria;o__Enterobacterales;f__Pasteurellaceae;g__Haemophilus_A;s__Haemophilus_A parahaemolyticus	GCF_002015035.1	95	d__Bacteria;p__Proteobacteria;c__Gammaproteobacteria;o__Enterobacterales;f__Pasteurellaceae;g__Haemophilus_A;s__Haemophilus_A parahaemolyticus	96.85	0.94	GCF_002015035.1	95	d__Bacteria;p__Proteobacteria;c__Gammaproteobacteria;o__Enterobacterales;f__Pasteurellaceae;g__Haemophilus_A;s__Haemophilus_A parahaemolyticus	96.85	0.94	d__Bacteria;p__Proteobacteria;c__Gammaproteobacteria;o__Enterobacterales;f__Pasteurellaceae;g__Haemophilus_A;s__	taxonomic classification defined by topology and ANI	topological placement and ANI have congruent species assignments	GCA_018373095.1, s__Haemophilus_A parahaemolyticus_A, 95.0, 93.2, 0.77; GCF_002015045.1, s__Haemophilus_A paraphrohaemolyticus, 95.0, 90.94, 0.79; GCF_000238795.1, s__Haemophilus_A sputorum, 95.0, 81.0, 0.41	94.54	11	N/A	N/A
MAG3	concoct.116	concoct.116	d__Bacteria;p__Firmicutes_A;c__Clostridia;o__Peptostreptococcales;f__Anaerovoracaceae;g__CAJPNN01;s__CAJPNN01 sp905372035	GCA_905372035.1	95	d__Bacteria;p__Firmicutes_A;c__Clostridia;o__Peptostreptococcales;f__Anaerovoracaceae;g__CAJPNN01;s__CAJPNN01 sp905372035	99.01	0.94	GCA_905372035.1	95	d__Bacteria;p__Firmicutes_A;c__Clostridia;o__Peptostreptococcales;f__Anaerovoracaceae;g__CAJPNN01;s__CAJPNN01 sp905372035	99.01	0.94	d__Bacteria;p__Firmicutes_A;c__Clostridia;o__Peptostreptococcales;f__Anaerovoracaceae;g__;s__	taxonomic classification defined by topology and ANI	topological placement and ANI have congruent species assignments	N/A	77.5	11	N/A	N/A
MAG30	maxbin_bin.67.2021-SN-27	maxbin_bin.67.2021-SN-27	d__Bacteria;p__Actinobacteriota;c__Actinomycetia;o__Mycobacteriales;f__Mycobacteriaceae;g__Corynebacterium;s__Corynebacterium durum	GCF_013410305.1	95	d__Bacteria;p__Actinobacteriota;c__Actinomycetia;o__Mycobacteriales;f__Mycobacteriaceae;g__Corynebacterium;s__Corynebacterium durum	97.59	0.94	GCF_013410305.1	95	d__Bacteria;p__Actinobacteriota;c__Actinomycetia;o__Mycobacteriales;f__Mycobacteriaceae;g__Corynebacterium;s__Corynebacterium durum	97.59	0.94	d__Bacteria;p__Actinobacteriota;c__Actinomycetia;o__Mycobacteriales;f__Mycobacteriaceae;g__Corynebacterium;s__	taxonomic classification defined by topology and ANI	topological placement and ANI have congruent species assignments	GCF_011612265.2, s__Corynebacterium matruchotii, 95.0, 79.6, 0.1; GCF_003716585.1, s__Corynebacterium alimapuense, 95.0, 79.54, 0.03; GCF_007904105.1, s__Corynebacterium sp007904105, 95.0, 79.51, 0.03; GCF_000023145.1, s__Corynebacterium kroppenstedtii, 95.0, 79.5, 0.03; GCA_012837295.1, s__Corynebacterium sp012837295, 95.0, 79.41, 0.06; GCF_009026825.1, s__Corynebacterium sp009026825, 95.0, 79.1…	41.04	11	N/A	N/A
MAG31	maxbin_bin.7.2021-SN-24	maxbin_bin.7.2021-SN-24	d__Bacteria;p__Firmicutes_A;c__Clostridia;o__Peptostreptococcales;f__Peptostreptococcaceae;g__Peptostreptococcus;s__Peptostreptococcus stomatis	GCF_000147675.1	95	d__Bacteria;p__Firmicutes_A;c__Clostridia;o__Peptostreptococcales;f__Peptostreptococcaceae;g__Peptostreptococcus;s__Peptostreptococcus stomatis	98.22	0.97	GCF_000147675.1	95	d__Bacteria;p__Firmicutes_A;c__Clostridia;o__Peptostreptococcales;f__Peptostreptococcaceae;g__Peptostreptococcus;s__Peptostreptococcus stomatis	98.22	0.97	d__Bacteria;p__Firmicutes_A;c__Clostridia;o__Peptostreptococcales;f__Peptostreptococcaceae;g__Peptostreptococcus;s__	taxonomic classification defined by topology and ANI	topological placement and ANI have congruent species assignments	GCA_900759325.1, s__Peptostreptococcus sp900759325, 95.0, 87.66, 0.92; GCF_000758885.1, s__Peptostreptococcus sp000758885, 95.0, 84.43, 0.84; GCF_014229965.1, s__Peptostreptococcus canis, 95.0, 80.07, 0.21; GCF_000381525.1, s__Peptostreptococcus anaerobius, 95.0, 79.65, 0.43; GCF_009695815.1, s__Peptostreptococcus porci, 95.0, 79.16, 0.23; GCF_900240845.1, s__Peptostreptococcus sp900240845, 95.0,…	64.99	11	N/A	N/A
MAG32	maxbin_bin.7.2021-SN-58	maxbin_bin.7.2021-SN-58	d__Bacteria;p__Actinobacteriota;c__Actinomycetia;o__Actinomycetales;f__Micrococcaceae;g__Rothia;s__Rothia mucilaginosa_B	GCF_001548235.1	95	d__Bacteria;p__Actinobacteriota;c__Actinomycetia;o__Actinomycetales;f__Micrococcaceae;g__Rothia;s__Rothia mucilaginosa_B	95.43	0.92	GCF_000175615.1	95	d__Bacteria;p__Actinobacteriota;c__Actinomycetia;o__Actinomycetales;f__Micrococcaceae;g__Rothia;s__Rothia mucilaginosa	94.37	0.93	d__Bacteria;p__Actinobacteriota;c__Actinomycetia;o__Actinomycetales;f__Micrococcaceae;g__Rothia;s__	ANI	topological placement and ANI have incongruent species assignments	GCF_001808955.1, s__Rothia sp001808955, 95.0, 93.94, 0.91; GCA_015265375.1, s__Rothia sp015265375, 95.0, 93.86, 0.93; GCF_001061665.1, s__Rothia mucilaginosa_A, 95.0, 88.69, 0.85; GCF_901875305.1, s__Rothia sp902373285, 95.0, 87.72, 0.85; GCF_000164695.2, s__Rothia dentocariosa, 95.0, 78.84, 0.27; GCA_002355935.1, s__Rothia aeria, 95.0, 78.61, 0.35; GCA_019115985.1, s__Rothia avicola, 95.0, 78.51…	96.21	11	N/A	N/A
MAG33	maxbin_bin.7.SN-14	maxbin_bin.7.SN-14	d__Bacteria;p__Actinobacteriota;c__Actinomycetia;o__Actinomycetales;f__Actinomycetaceae;g__Actinomyces;s__Actinomyces oris_A	GCF_001553935.1	95	d__Bacteria;p__Actinobacteriota;c__Actinomycetia;o__Actinomycetales;f__Actinomycetaceae;g__Actinomyces;s__Actinomyces oris_A	97.26	0.99	GCF_001553935.1	95	d__Bacteria;p__Actinobacteriota;c__Actinomycetia;o__Actinomycetales;f__Actinomycetaceae;g__Actinomyces;s__Actinomyces oris_A	97.26	0.99	d__Bacteria;p__Actinobacteriota;c__Actinomycetia;o__Actinomycetales;f__Actinomycetaceae;g__Actinomyces;s__	taxonomic classification defined by topology and ANI	topological placement and ANI have congruent species assignments	GCF_006546825.1, s__Actinomyces oris, 95.0, 96.3, 0.96; GCF_001937445.1, s__Actinomyces oris_C, 95.0, 94.01, 0.94; GCF_001929375.1, s__Actinomyces oris_B, 95.0, 93.26, 0.93; GCF_001937665.1, s__Actinomyces oris_D, 95.0, 92.68, 0.94; GCF_005696555.1, s__Actinomyces oris_E, 95.0, 92.47, 0.94; GCF_001956585.1, s__Actinomyces naeslundii, 95.0, 90.21, 0.94; GCF_900637975.1, s__Actinomyces viscosus, 95…	74.5	11	N/A	N/A
MAG34	maxbin_bin.7_sub.SN-18	maxbin_bin.7_sub.SN-18	d__Bacteria;p__Actinobacteriota;c__Actinomycetia;o__Actinomycetales;f__Micrococcaceae;g__Rothia;s__Rothia mucilaginosa	GCF_000175615.1	95	d__Bacteria;p__Actinobacteriota;c__Actinomycetia;o__Actinomycetales;f__Micrococcaceae;g__Rothia;s__Rothia mucilaginosa	95.58	0.93	GCA_015265375.1	95	d__Bacteria;p__Actinobacteriota;c__Actinomycetia;o__Actinomycetales;f__Micrococcaceae;g__Rothia;s__Rothia sp015265375	94.16	0.88	d__Bacteria;p__Actinobacteriota;c__Actinomycetia;o__Actinomycetales;f__Micrococcaceae;g__Rothia;s__	ANI	topological placement and ANI have incongruent species assignments	GCF_001548235.1, s__Rothia mucilaginosa_B, 95.0, 95.14, 0.93; GCF_001808955.1, s__Rothia sp001808955, 95.0, 94.5, 0.94; GCF_001061665.1, s__Rothia mucilaginosa_A, 95.0, 88.81, 0.87; GCF_901875305.1, s__Rothia sp902373285, 95.0, 87.71, 0.85; GCA_002355935.1, s__Rothia aeria, 95.0, 78.8, 0.38; GCF_014635585.1, s__Rothia aerolata, 95.0, 78.59, 0.26; GCF_000164695.2, s__Rothia dentocariosa, 95.0, 78.…	90.91	11	N/A	N/A
MAG35	maxbin_bin.8.2021-SN-58	maxbin_bin.8.2021-SN-58	d__Bacteria;p__Firmicutes;c__Bacilli;o__Acholeplasmatales;f__Acholeplasmataceae;g__;s__	N/A	N/A	N/A	N/A	N/A	N/A	N/A	N/A	N/A	N/A	d__Bacteria;p__Firmicutes;c__Bacilli;o__Acholeplasmatales;f__Acholeplasmataceae;g__;s__	taxonomic novelty determined using RED	classification based on placement in class-level tree	N/A	77.88	11	0.849571	N/A
MAG36	maxbin_bin.8.SN-9	maxbin_bin.8.SN-9	d__Bacteria;p__Actinobacteriota;c__Actinomycetia;o__Actinomycetales;f__Actinomycetaceae;g__Pauljensenia;s__Pauljensenia sp001072465	GCA_001072465.1	95	d__Bacteria;p__Actinobacteriota;c__Actinomycetia;o__Actinomycetales;f__Actinomycetaceae;g__Pauljensenia;s__Pauljensenia sp001072465	95.1	0.97	GCA_001072465.1	95	d__Bacteria;p__Actinobacteriota;c__Actinomycetia;o__Actinomycetales;f__Actinomycetaceae;g__Pauljensenia;s__Pauljensenia sp001072465	95.1	0.97	d__Bacteria;p__Actinobacteriota;c__Actinomycetia;o__Actinomycetales;f__Actinomycetaceae;g__Pauljensenia;s__	taxonomic classification defined by topology and ANI	topological placement and ANI have congruent species assignments	GCA_018382595.1, s__Pauljensenia sp018382595, 95.0, 94.74, 0.88; GCF_005696695.1, s__Pauljensenia odontolytica_C, 95.0, 94.64, 0.91; GCA_018375675.1, s__Pauljensenia sp018375675, 95.0, 94.46, 0.94; GCF_001838165.1, s__Pauljensenia sp001838165, 95.0, 94.35, 0.88; GCF_002847525.1, s__Pauljensenia odontolytica_B, 95.0, 94.1, 0.91; GCF_001064145.1, s__Pauljensenia sp001064145, 95.0, 93.96, 0.91; GCF_…	47.6	11	N/A	N/A
MAG37	maxbin_bin.9.SN-22	maxbin_bin.9.SN-22	d__Bacteria;p__Firmicutes;c__Bacilli;o__Staphylococcales;f__Gemellaceae;g__Gemella;s__	N/A	N/A	N/A	N/A	N/A	N/A	N/A	N/A	N/A	N/A	d__Bacteria;p__Firmicutes;c__Bacilli;o__Staphylococcales;f__Gemellaceae;g__Gemella;s__	taxonomic classification defined by topology and ANI	classification based on placement in class-level tree	GCF_001553035.1, s__Gemella haemolysans_B, 95.0, 91.46, 0.83; GCF_000173915.1, s__Gemella haemolysans, 95.0, 91.4, 0.83; GCA_900766305.1, s__Gemella sp900766305, 95.0, 90.56, 0.81; GCA_002871655.1, s__Gemella sp002871655, 95.0, 87.67, 0.8; GCF_901873445.1, s__Gemella haemolysans_C, 95.0, 87.6, 0.79; GCF_012273215.1, s__Gemella haemolysans_A, 95.0, 87.52, 0.78; GCF_000701685.1, s__Gemella sanguini…	64.83	11	0.994022	Genome not assigned to closest species as it falls outside its pre-defined ANI radius
MAG38	metabat_bin.1.SN-22	metabat_bin.1.SN-22	d__Bacteria;p__Firmicutes;c__Bacilli;o__Lactobacillales;f__Streptococcaceae;g__Streptococcus;s__Streptococcus pneumoniae	GCF_001457635.1	95	d__Bacteria;p__Firmicutes;c__Bacilli;o__Lactobacillales;f__Streptococcaceae;g__Streptococcus;s__Streptococcus pneumoniae	98.7	0.97	GCF_001457635.1	95	d__Bacteria;p__Firmicutes;c__Bacilli;o__Lactobacillales;f__Streptococcaceae;g__Streptococcus;s__Streptococcus pneumoniae	98.7	0.97	d__Bacteria;p__Firmicutes;c__Bacilli;o__Lactobacillales;f__Streptococcaceae;g__Streptococcus;s__	taxonomic classification defined by topology and ANI	topological placement and ANI have congruent species assignments	GCF_002087075.1, s__Streptococcus pseudopneumoniae, 95.0, 94.63, 0.86; GCF_001347015.1, s__Streptococcus pneumoniae_E, 95.0, 93.65, 0.83; GCF_001096185.1, s__Streptococcus pneumoniae_B, 95.0, 93.46, 0.85; GCF_001113365.1, s__Streptococcus pneumoniae_C, 95.0, 93.46, 0.85; GCF_001171885.1, s__Streptococcus pneumoniae_A, 95.0, 93.37, 0.84; GCF_900411395.1, s__Streptococcus mitis_BA, 95.0, 93.23, 0.8…	95.77	11	N/A	N/A
MAG39	metabat_bin.15.2021-SN-57	metabat_bin.15.2021-SN-57	d__Bacteria;p__Fusobacteriota;c__Fusobacteriia;o__Fusobacteriales;f__Fusobacteriaceae;g__Fusobacterium;s__Fusobacterium pseudoperiodonticum	GCF_002761955.1	95.1543	d__Bacteria;p__Fusobacteriota;c__Fusobacteriia;o__Fusobacteriales;f__Fusobacteriaceae;g__Fusobacterium;s__Fusobacterium pseudoperiodonticum	96.63	0.9	GCF_002761955.1	95.1543	d__Bacteria;p__Fusobacteriota;c__Fusobacteriia;o__Fusobacteriales;f__Fusobacteriaceae;g__Fusobacterium;s__Fusobacterium pseudoperiodonticum	96.63	0.9	d__Bacteria;p__Fusobacteriota;c__Fusobacteriia;o__Fusobacteriales;f__Fusobacteriaceae;g__Fusobacterium;s__	taxonomic classification defined by topology and ANI	topological placement and ANI have congruent species assignments	GCF_002763915.1, s__Fusobacterium periodonticum_D, 95.1543, 94.9, 0.89; GCF_000163935.1, s__Fusobacterium periodonticum_B, 95.0, 94.67, 0.88; GCF_000160475.1, s__Fusobacterium periodonticum, 95.0, 92.97, 0.89; GCF_000235465.1, s__Fusobacterium sp000235465, 95.0, 91.32, 0.76; GCF_014217355.1, s__Fusobacterium hwasookii, 95.0, 86.16, 0.8; GCF_001457555.1, s__Fusobacterium polymorphum, 95.0, 85.9, 0…	91.74	11	N/A	N/A
MAG4	concoct.118	concoct.118	d__Bacteria;p__Firmicutes;c__Bacilli;o__Erysipelotrichales;f__Coprobacillaceae;g__Eggerthia;s__Eggerthia catenaformis	GCF_000340375.1	95	d__Bacteria;p__Firmicutes;c__Bacilli;o__Erysipelotrichales;f__Coprobacillaceae;g__Eggerthia;s__Eggerthia catenaformis	98.05	1	GCF_000340375.1	95	d__Bacteria;p__Firmicutes;c__Bacilli;o__Erysipelotrichales;f__Coprobacillaceae;g__Eggerthia;s__Eggerthia catenaformis	98.05	1	d__Bacteria;p__Firmicutes;c__Bacilli;o__Erysipelotrichales;f__Coprobacillaceae;g__;s__	taxonomic classification defined by topology and ANI	topological placement and ANI have congruent species assignments	N/A	56.41	11	N/A	N/A
MAG40	metabat_bin.16.2021-SN-28	metabat_bin.16.2021-SN-28	d__Bacteria;p__Firmicutes;c__Bacilli;o__Staphylococcales;f__Gemellaceae;g__Gemella;s__Gemella sanguinis	GCF_000701685.1	95	d__Bacteria;p__Firmicutes;c__Bacilli;o__Staphylococcales;f__Gemellaceae;g__Gemella;s__Gemella sanguinis	96.17	0.92	GCF_000701685.1	95	d__Bacteria;p__Firmicutes;c__Bacilli;o__Staphylococcales;f__Gemellaceae;g__Gemella;s__Gemella sanguinis	96.17	0.92	d__Bacteria;p__Firmicutes;c__Bacilli;o__Staphylococcales;f__Gemellaceae;g__Gemella;s__	taxonomic classification defined by topology and ANI	topological placement and ANI have congruent species assignments	GCA_900555985.1, s__Gemella sp900555985, 95.0, 92.9, 0.67; GCA_002871655.1, s__Gemella sp002871655, 95.0, 81.84, 0.65; GCF_012273215.1, s__Gemella haemolysans_A, 95.0, 81.82, 0.66; GCF_901873445.1, s__Gemella haemolysans_C, 95.0, 81.68, 0.61; GCF_000173915.1, s__Gemella haemolysans, 95.0, 81.48, 0.61; GCF_001553035.1, s__Gemella haemolysans_B, 95.0, 81.37, 0.6; GCF_900476045.1, s__Gemella morbill…	93.49	11	N/A	N/A
MAG41	metabat_bin.18.2021-SN-58	metabat_bin.18.2021-SN-58	d__Bacteria;p__Firmicutes_A;c__Clostridia;o__Lachnospirales;f__Lachnospiraceae;g__Catonella;s__	N/A	N/A	N/A	N/A	N/A	GCF_000160035.2	95	d__Bacteria;p__Firmicutes_A;c__Clostridia;o__Lachnospirales;f__Lachnospiraceae;g__Catonella;s__Catonella morbi	86.48	0.76	d__Bacteria;p__Firmicutes_A;c__Clostridia;o__Lachnospirales;f__Lachnospiraceae;g__Catonella;s__	taxonomic classification defined by topology and ANI	classification based on placement in class-level tree	GCF_016651435.1, s__Catonella massiliensis, 95.0, 80.67, 0.58; GCA_902796595.1, s__Catonella sp902796595, 95.0, 76.51, 0.06; GCA_900314885.1, s__Catonella sp900314885, 95.0, 76.44, 0.04; GCA_902783375.1, s__Catonella sp902783375, 95.0, 76.08, 0.02	79.19	11	0.987533	Genome not assigned to closest species as it falls outside its pre-defined ANI radius
MAG42	metabat_bin.22.2021-SN-27	metabat_bin.22.2021-SN-27	d__Bacteria;p__Actinobacteriota;c__Actinomycetia;o__Actinomycetales;f__Micrococcaceae;g__Rothia;s__Rothia dentocariosa	GCF_000164695.2	95	d__Bacteria;p__Actinobacteriota;c__Actinomycetia;o__Actinomycetales;f__Micrococcaceae;g__Rothia;s__Rothia dentocariosa	96.53	0.95	GCF_000164695.2	95	d__Bacteria;p__Actinobacteriota;c__Actinomycetia;o__Actinomycetales;f__Micrococcaceae;g__Rothia;s__Rothia dentocariosa	96.53	0.95	d__Bacteria;p__Actinobacteriota;c__Actinomycetia;o__Actinomycetales;f__Micrococcaceae;g__Rothia;s__	taxonomic classification defined by topology and ANI	topological placement and ANI have congruent species assignments	GCA_002355935.1, s__Rothia aeria, 95.0, 83.79, 0.5; GCA_015265375.1, s__Rothia sp015265375, 95.0, 78.67, 0.27; GCF_000175615.1, s__Rothia mucilaginosa, 95.0, 78.27, 0.28; GCF_001548235.1, s__Rothia mucilaginosa_B, 95.0, 78.25, 0.27; GCF_901875305.1, s__Rothia sp902373285, 95.0, 78.21, 0.25; GCF_001061665.1, s__Rothia mucilaginosa_A, 95.0, 78.2, 0.27; GCF_001808955.1, s__Rothia sp001808955, 95.0, …	68.8	11	N/A	N/A
MAG43	metabat_bin.27.2021-SN-58	metabat_bin.27.2021-SN-58	d__Bacteria;p__Firmicutes_A;c__Clostridia;o__Peptostreptococcales;f__Anaerovoracaceae;g__Eubacterium_M;s__Eubacterium_M brachy	GCA_000488855.1	95	d__Bacteria;p__Firmicutes_A;c__Clostridia;o__Peptostreptococcales;f__Anaerovoracaceae;g__Eubacterium_M;s__Eubacterium_M brachy	98.86	0.96	GCA_000488855.1	95	d__Bacteria;p__Firmicutes_A;c__Clostridia;o__Peptostreptococcales;f__Anaerovoracaceae;g__Eubacterium_M;s__Eubacterium_M brachy	98.86	0.96	d__Bacteria;p__Firmicutes_A;c__Clostridia;o__Peptostreptococcales;f__Anaerovoracaceae;g__Eubacterium_M;s__	taxonomic classification defined by topology and ANI	topological placement and ANI have congruent species assignments	GCA_014982745.1, s__Eubacterium_M pullicola, 95.0, 77.9, 0.06	92.99	11	N/A	N/A
MAG44	metabat_bin.29.2021-SN-27	metabat_bin.29.2021-SN-27	d__Bacteria;p__Actinobacteriota;c__Actinomycetia;o__Mycobacteriales;f__Mycobacteriaceae;g__Corynebacterium;s__Corynebacterium argentoratense	GCF_000590555.1	95	d__Bacteria;p__Actinobacteriota;c__Actinomycetia;o__Mycobacteriales;f__Mycobacteriaceae;g__Corynebacterium;s__Corynebacterium argentoratense	98.41	0.97	GCF_000590555.1	95	d__Bacteria;p__Actinobacteriota;c__Actinomycetia;o__Mycobacteriales;f__Mycobacteriaceae;g__Corynebacterium;s__Corynebacterium argentoratense	98.41	0.97	d__Bacteria;p__Actinobacteriota;c__Actinomycetia;o__Mycobacteriales;f__Mycobacteriaceae;g__Corynebacterium;s__	taxonomic classification defined by topology and ANI	topological placement and ANI have congruent species assignments	GCF_001941445.1, s__Corynebacterium aquilae, 95.0, 79.88, 0.3; GCF_002994655.1, s__Corynebacterium sp002994655, 95.0, 79.14, 0.31; GCF_900187135.1, s__Corynebacterium ulcerans, 95.0, 78.65, 0.11; GCF_003814005.1, s__Corynebacterium pseudopelargi, 95.0, 78.63, 0.15; GCF_004114895.1, s__Corynebacterium pelargi, 95.0, 78.6, 0.15; GCF_003813985.1, s__Corynebacterium geronticis, 95.0, 78.5, 0.15; GCF_…	96.27	11	N/A	N/A
MAG45	metabat_bin.3.SN-41	metabat_bin.3.SN-41	d__Bacteria;p__Firmicutes;c__Bacilli;o__Lactobacillales;f__Streptococcaceae;g__Streptococcus;s__Streptococcus anginosus_C	GCF_001697145.1	95	d__Bacteria;p__Firmicutes;c__Bacilli;o__Lactobacillales;f__Streptococcaceae;g__Streptococcus;s__Streptococcus anginosus_C	96.67	0.91	GCF_001697145.1	95	d__Bacteria;p__Firmicutes;c__Bacilli;o__Lactobacillales;f__Streptococcaceae;g__Streptococcus;s__Streptococcus anginosus_C	96.67	0.91	d__Bacteria;p__Firmicutes;c__Bacilli;o__Lactobacillales;f__Streptococcaceae;g__Streptococcus;s__	taxonomic classification defined by topology and ANI	topological placement and ANI have congruent species assignments	GCF_900636475.1, s__Streptococcus anginosus, 95.0, 95.21, 0.89; GCF_902167705.1, s__Streptococcus constellatus_A, 95.0, 91.41, 0.84; GCF_900459125.1, s__Streptococcus constellatus, 95.0, 88.77, 0.83; GCF_000413475.1, s__Streptococcus intermedius, 95.0, 86.71, 0.76; GCF_000380065.1, s__Streptococcus massiliensis, 95.0, 81.18, 0.29; GCF_902460355.1, s__Streptococcus sp902460355, 95.0, 79.67, 0.31; …	97.56	11	N/A	N/A
MAG46	metabat_bin.31.2021-SN-58	metabat_bin.31.2021-SN-58	d__Bacteria;p__Firmicutes;c__Bacilli;o__Lactobacillales;f__Streptococcaceae;g__Streptococcus;s__Streptococcus intermedius	GCF_000413475.1	95	d__Bacteria;p__Firmicutes;c__Bacilli;o__Lactobacillales;f__Streptococcaceae;g__Streptococcus;s__Streptococcus intermedius	98.29	0.95	GCF_000413475.1	95	d__Bacteria;p__Firmicutes;c__Bacilli;o__Lactobacillales;f__Streptococcaceae;g__Streptococcus;s__Streptococcus intermedius	98.29	0.95	d__Bacteria;p__Firmicutes;c__Bacilli;o__Lactobacillales;f__Streptococcaceae;g__Streptococcus;s__	taxonomic classification defined by topology and ANI	topological placement and ANI have congruent species assignments	GCF_900459125.1, s__Streptococcus constellatus, 95.0, 92.66, 0.84; GCF_900636475.1, s__Streptococcus anginosus, 95.0, 87.33, 0.78; GCF_001697145.1, s__Streptococcus anginosus_C, 95.0, 87.21, 0.8; GCF_902167705.1, s__Streptococcus constellatus_A, 95.0, 86.56, 0.77; GCF_003943655.1, s__Streptococcus sanguinis_F, 95.0, 81.9, 0.3; GCF_013343115.1, s__Streptococcus sanguinis_H, 95.0, 81.35, 0.31; GCF_…	97.5	11	N/A	N/A
MAG47	metabat_bin.34.2021-SN-27	metabat_bin.34.2021-SN-27	d__Bacteria;p__Firmicutes_A;c__Clostridia;o__Peptostreptococcales;f__Anaerovoracaceae;g__Eubacterium_B;s__Eubacterium_B sulci	GCA_001189495.1	95	d__Bacteria;p__Firmicutes_A;c__Clostridia;o__Peptostreptococcales;f__Anaerovoracaceae;g__Eubacterium_B;s__Eubacterium_B sulci	96.76	0.93	GCA_001189495.1	95	d__Bacteria;p__Firmicutes_A;c__Clostridia;o__Peptostreptococcales;f__Anaerovoracaceae;g__Eubacterium_B;s__Eubacterium_B sulci	96.76	0.93	d__Bacteria;p__Firmicutes_A;c__Clostridia;o__Peptostreptococcales;f__Anaerovoracaceae;g__Eubacterium_B;s__	taxonomic classification defined by topology and ANI	topological placement and ANI have congruent species assignments	GCA_900450455.1, s__Eubacterium_B infirmum, 95.0, 84.97, 0.86; GCA_017437565.1, s__Eubacterium_B sp017437565, 95.0, 78.16, 0.02; GCA_905236895.1, s__Eubacterium_B sp905236895, 95.0, 77.61, 0.03; GCA_002472145.1, s__Eubacterium_B sp002472145, 95.0, 77.5, 0.02; GCA_017445315.1, s__Eubacterium_B sp017445315, 95.0, 77.28, 0.03; GCA_902776725.1, s__Eubacterium_B sp902776725, 95.0, 77.26, 0.05; GCA_017…	81.04	11	N/A	N/A
MAG48	metabat_bin.4.2021-SN-24	metabat_bin.4.2021-SN-24	d__Bacteria;p__Firmicutes_A;c__Clostridia;o__Peptostreptococcales;f__Anaerovoracaceae;g__Hornefia;s__Hornefia nodata	GCA_000510425.1	95	d__Bacteria;p__Firmicutes_A;c__Clostridia;o__Peptostreptococcales;f__Anaerovoracaceae;g__Hornefia;s__Hornefia nodata	98.21	0.89	GCA_000510425.1	95	d__Bacteria;p__Firmicutes_A;c__Clostridia;o__Peptostreptococcales;f__Anaerovoracaceae;g__Hornefia;s__Hornefia nodata	98.21	0.89	d__Bacteria;p__Firmicutes_A;c__Clostridia;o__Peptostreptococcales;f__Anaerovoracaceae;g__Hornefia;s__	taxonomic classification defined by topology and ANI	topological placement and ANI have congruent species assignments	GCA_003433295.1, s__Hornefia minuta, 95.0, 79.18, 0.13; GCF_001940235.1, s__Hornefia porci, 95.0, 79.02, 0.06; GCF_000688015.1, s__Hornefia sp000688015, 95.0, 77.68, 0.03; GCF_009695915.1, s__Hornefia butyriciproducens, 95.0, 76.88, 0.07; GCA_017425345.1, s__Hornefia sp017425345, 95.0, 76.5, 0.03; GCA_900315125.1, s__Hornefia sp900315125, 95.0, 76.39, 0.05	82.74	11	N/A	N/A
MAG49	metabat_bin.4.2021-SN-56	metabat_bin.4.2021-SN-56	d__Bacteria;p__Actinobacteriota;c__Coriobacteriia;o__Coriobacteriales;f__Atopobiaceae;g__Lancefieldella;s__Lancefieldella sp000564995	GCF_000564995.1	95	d__Bacteria;p__Actinobacteriota;c__Coriobacteriia;o__Coriobacteriales;f__Atopobiaceae;g__Lancefieldella;s__Lancefieldella sp000564995	95.56	0.99	GCA_015259035.1	95	d__Bacteria;p__Actinobacteriota;c__Coriobacteriia;o__Coriobacteriales;f__Atopobiaceae;g__Lancefieldella;s__Lancefieldella sp015259035	94.49	0.74	d__Bacteria;p__Actinobacteriota;c__Coriobacteriia;o__Coriobacteriales;f__Atopobiaceae;g__Lancefieldella;s__	ANI	topological placement and ANI have incongruent species assignments	GCA_015259045.1, s__Lancefieldella sp015259045, 95.0, 94.44, 0.75; GCA_015258715.1, s__Lancefieldella sp015258715, 95.0, 94.42, 0.95; GCA_015259105.1, s__Lancefieldella sp015259105, 95.0, 94.37, 0.89; GCA_900555335.1, s__Lancefieldella sp900555335, 95.0, 94.11, 0.72; GCA_015258605.1, s__Lancefieldella sp015258605, 95.0, 93.74, 0.7; GCF_000024225.1, s__Lancefieldella parvula, 95.0, 89.65, 0.96; GC…	64.77	11	N/A	N/A
MAG5	concoct.15	concoct.15	d__Bacteria;p__Proteobacteria;c__Gammaproteobacteria;o__Burkholderiales;f__Burkholderiaceae;g__Lautropia;s__Lautropia mirabilis	GCF_900637555.1	95	d__Bacteria;p__Proteobacteria;c__Gammaproteobacteria;o__Burkholderiales;f__Burkholderiaceae;g__Lautropia;s__Lautropia mirabilis	96.34	0.94	GCF_900637555.1	95	d__Bacteria;p__Proteobacteria;c__Gammaproteobacteria;o__Burkholderiales;f__Burkholderiaceae;g__Lautropia;s__Lautropia mirabilis	96.34	0.94	d__Bacteria;p__Proteobacteria;c__Gammaproteobacteria;o__Burkholderiales;f__Burkholderiaceae;g__Lautropia;s__	taxonomic classification defined by topology and ANI	topological placement and ANI have congruent species assignments	GCF_003892345.1, s__Lautropia dentalis, 95.0, 84.04, 0.84; GCA_012513675.1, s__Lautropia sp012513675, 95.0, 78.06, 0.23; GCA_013813615.1, s__Lautropia sp013813615, 95.0, 77.76, 0.2	76.99	11	N/A	Genome has more than 15.8% of markers with multiple hits
MAG50	metabat_bin.5.2021-SN-56	metabat_bin.5.2021-SN-56	d__Bacteria;p__Actinobacteriota;c__Actinomycetia;o__Actinomycetales;f__Micrococcaceae;g__Rothia;s__Rothia mucilaginosa_A	GCF_001061665.1	95	d__Bacteria;p__Actinobacteriota;c__Actinomycetia;o__Actinomycetales;f__Micrococcaceae;g__Rothia;s__Rothia mucilaginosa_A	97.15	0.96	GCF_001061665.1	95	d__Bacteria;p__Actinobacteriota;c__Actinomycetia;o__Actinomycetales;f__Micrococcaceae;g__Rothia;s__Rothia mucilaginosa_A	97.15	0.96	d__Bacteria;p__Actinobacteriota;c__Actinomycetia;o__Actinomycetales;f__Micrococcaceae;g__Rothia;s__	taxonomic classification defined by topology and ANI	topological placement and ANI have congruent species assignments	GCF_901875305.1, s__Rothia sp902373285, 95.0, 91.16, 0.93; GCF_001808955.1, s__Rothia sp001808955, 95.0, 89.25, 0.9; GCF_000175615.1, s__Rothia mucilaginosa, 95.0, 88.65, 0.9; GCA_015265375.1, s__Rothia sp015265375, 95.0, 88.56, 0.82; GCF_001548235.1, s__Rothia mucilaginosa_B, 95.0, 88.45, 0.92; GCA_002355935.1, s__Rothia aeria, 95.0, 78.92, 0.37; GCF_000164695.2, s__Rothia dentocariosa, 95.0, 78…	84.19	11	N/A	N/A
MAG51	metabat_bin.5.2021-SN-57	metabat_bin.5.2021-SN-57	d__Bacteria;p__Patescibacteria;c__Saccharimonadia;o__Saccharimonadales;f__Nanosynbacteraceae;g__Nanosynbacter;s__	N/A	N/A	N/A	N/A	N/A	GCA_905372305.1	95	d__Bacteria;p__Patescibacteria;c__Saccharimonadia;o__Saccharimonadales;f__Nanosynbacteraceae;g__Nanosynbacter;s__Nanosynbacter sp905372305	92.53	0.87	d__Bacteria;p__Patescibacteria;c__Saccharimonadia;o__Saccharimonadales;f__Nanosynbacteraceae;g__Nanosynbacter;s__	taxonomic classification defined by topology and ANI	classification based on placement in class-level tree	GCA_905373795.1, s__Nanosynbacter sp905373795, 95.0, 92.55, 0.88; GCA_013099015.1, s__Nanosynbacter sp013099015, 95.0, 84.73, 0.53; GCA_013100805.1, s__Nanosynbacter sp013100805, 95.0, 84.59, 0.5; GCA_010202115.1, s__Nanosynbacter sp010202115, 95.0, 84.54, 0.54; GCA_010202465.1, s__Nanosynbacter sp010202465, 95.0, 84.41, 0.54; GCA_005697215.1, s__Nanosynbacter sp005697215, 95.0, 84.4, 0.52; GCA_0…	67.41	11	0.989611	Genome not assigned to closest species as it falls outside its pre-defined ANI radius
MAG52	metabat_bin.5.SN-18	metabat_bin.5.SN-18	d__Bacteria;p__Actinobacteriota;c__Actinomycetia;o__Actinomycetales;f__Actinomycetaceae;g__Pauljensenia;s__Pauljensenia sp000278725	GCF_000278725.1	95	d__Bacteria;p__Actinobacteriota;c__Actinomycetia;o__Actinomycetales;f__Actinomycetaceae;g__Pauljensenia;s__Pauljensenia sp000278725	97.92	0.87	GCF_000278725.1	95	d__Bacteria;p__Actinobacteriota;c__Actinomycetia;o__Actinomycetales;f__Actinomycetaceae;g__Pauljensenia;s__Pauljensenia sp000278725	97.92	0.87	d__Bacteria;p__Actinobacteriota;c__Actinomycetia;o__Actinomycetales;f__Actinomycetaceae;g__Pauljensenia;s__	taxonomic classification defined by topology and ANI	topological placement and ANI have congruent species assignments	GCA_902373545.1, s__Pauljensenia sp902373545, 95.0, 87.91, 0.76; GCF_000466265.1, s__Pauljensenia sp000466265, 95.0, 86.86, 0.76; GCF_005696695.1, s__Pauljensenia odontolytica_C, 95.0, 86.22, 0.74; GCA_018382595.1, s__Pauljensenia sp018382595, 95.0, 86.03, 0.75; GCF_001838165.1, s__Pauljensenia sp001838165, 95.0, 85.99, 0.76; GCF_002847525.1, s__Pauljensenia odontolytica_B, 95.0, 85.96, 0.75; GCF…	97.92	11	N/A	N/A
MAG53	metabat_bin.6.2021-SN-58	metabat_bin.6.2021-SN-58	d__Bacteria;p__Fusobacteriota;c__Fusobacteriia;o__Fusobacteriales;f__Fusobacteriaceae;g__Fusobacterium;s__Fusobacterium nucleatum_J	GCF_008633215.1	95	d__Bacteria;p__Fusobacteriota;c__Fusobacteriia;o__Fusobacteriales;f__Fusobacteriaceae;g__Fusobacterium;s__Fusobacterium nucleatum_J	98.89	0.93	GCF_008633215.1	95	d__Bacteria;p__Fusobacteriota;c__Fusobacteriia;o__Fusobacteriales;f__Fusobacteriaceae;g__Fusobacterium;s__Fusobacterium nucleatum_J	98.89	0.93	d__Bacteria;p__Fusobacteriota;c__Fusobacteriia;o__Fusobacteriales;f__Fusobacteriaceae;g__Fusobacterium;s__	taxonomic classification defined by topology and ANI	topological placement and ANI have congruent species assignments	GCF_000158275.2, s__Fusobacterium animalis, 95.0, 92.58, 0.82; GCA_000182945.1, s__Fusobacterium vincentii, 95.0, 92.42, 0.75; GCA_000007325.1, s__Fusobacterium nucleatum, 95.0, 91.59, 0.83; GCF_016724785.1, s__Fusobacterium canifelinum, 95.0, 90.3, 0.81; GCF_001457555.1, s__Fusobacterium polymorphum, 95.0, 89.88, 0.79; GCF_002573625.1, s__Fusobacterium nucleatum_D, 95.0, 89.78, 0.79; GCF_0142173…	84.99	11	N/A	N/A
MAG54	metabat_bin.7.2021-SN-27	metabat_bin.7.2021-SN-27	d__Bacteria;p__Firmicutes_A;c__Clostridia;o__Peptostreptococcales;f__Anaerovoracaceae;g__Eubacterium_N;s__Eubacterium_N saphenum	GCA_000161975.1	95	d__Bacteria;p__Firmicutes_A;c__Clostridia;o__Peptostreptococcales;f__Anaerovoracaceae;g__Eubacterium_N;s__Eubacterium_N saphenum	97.78	0.95	GCA_000161975.1	95	d__Bacteria;p__Firmicutes_A;c__Clostridia;o__Peptostreptococcales;f__Anaerovoracaceae;g__Eubacterium_N;s__Eubacterium_N saphenum	97.78	0.95	d__Bacteria;p__Firmicutes_A;c__Clostridia;o__Peptostreptococcales;f__Anaerovoracaceae;g__;s__	taxonomic classification defined by topology and ANI	topological placement and ANI have congruent species assignments	N/A	85.27	11	N/A	N/A
MAG55	metabat_bin.9.2021-SN-27	metabat_bin.9.2021-SN-27	d__Bacteria;p__Firmicutes_A;c__Clostridia;o__Peptostreptococcales;f__Anaerovoracaceae;g__Mogibacterium;s__Mogibacterium diversum	GCF_002998925.1	95	d__Bacteria;p__Firmicutes_A;c__Clostridia;o__Peptostreptococcales;f__Anaerovoracaceae;g__Mogibacterium;s__Mogibacterium diversum	95.79	0.97	GCF_002998925.1	95	d__Bacteria;p__Firmicutes_A;c__Clostridia;o__Peptostreptococcales;f__Anaerovoracaceae;g__Mogibacterium;s__Mogibacterium diversum	95.79	0.97	d__Bacteria;p__Firmicutes_A;c__Clostridia;o__Peptostreptococcales;f__Anaerovoracaceae;g__Mogibacterium;s__	taxonomic classification defined by topology and ANI	topological placement and ANI have congruent species assignments	GCF_002243385.1, s__Mogibacterium pumilum, 95.0, 84.47, 0.83; GCF_000525775.1, s__Mogibacterium timidum, 95.0, 79.96, 0.44	67.06	11	N/A	N/A
MAG56	metabat_bin.9.2021-SN-58	metabat_bin.9.2021-SN-58	d__Bacteria;p__Firmicutes_A;c__Clostridia;o__Tissierellales;f__Peptoniphilaceae;g__Parvimonas;s__Parvimonas micra	GCF_900637905.1	95	d__Bacteria;p__Firmicutes_A;c__Clostridia;o__Tissierellales;f__Peptoniphilaceae;g__Parvimonas;s__Parvimonas micra	97.41	0.94	GCF_900637905.1	95	d__Bacteria;p__Firmicutes_A;c__Clostridia;o__Tissierellales;f__Peptoniphilaceae;g__Parvimonas;s__Parvimonas micra	97.41	0.94	d__Bacteria;p__Firmicutes_A;c__Clostridia;o__Tissierellales;f__Peptoniphilaceae;g__Parvimonas;s__	taxonomic classification defined by topology and ANI	topological placement and ANI have congruent species assignments	GCF_000214475.1, s__Parvimonas sp000214475, 95.0, 91.61, 0.88; GCF_000223315.1, s__Parvimonas sp000223315, 95.0, 91.25, 0.83; GCA_015257355.1, s__Parvimonas sp015257355, 95.0, 86.44, 0.81; GCF_001553085.1, s__Parvimonas sp001553085, 95.0, 85.49, 0.73; GCA_001552895.1, s__Parvimonas sp001552895, 95.0, 79.96, 0.47	96.53	11	N/A	N/A
MAG6	concoct.155	concoct.155	d__Bacteria;p__Actinobacteriota;c__Actinomycetia;o__Actinomycetales;f__Actinomycetaceae;g__Actinomyces;s__Actinomyces sp002999235	GCF_002999235.1	95	d__Bacteria;p__Actinobacteriota;c__Actinomycetia;o__Actinomycetales;f__Actinomycetaceae;g__Actinomyces;s__Actinomyces sp002999235	98.4	0.96	GCF_002999235.1	95	d__Bacteria;p__Actinobacteriota;c__Actinomycetia;o__Actinomycetales;f__Actinomycetaceae;g__Actinomyces;s__Actinomyces sp002999235	98.4	0.96	d__Bacteria;p__Actinobacteriota;c__Actinomycetia;o__Actinomycetales;f__Actinomycetaceae;g__Actinomyces;s__	taxonomic classification defined by topology and ANI	topological placement and ANI have congruent species assignments	GCA_000711965.1, s__Actinomyces israelii, 95.0, 81.95, 0.59; GCF_000429225.1, s__Actinomyces dentalis, 95.0, 81.71, 0.57; GCF_001278845.1, s__Actinomyces sp001278845, 95.0, 81.43, 0.56; GCF_017592395.1, s__Actinomyces bowdenii, 95.0, 81.2, 0.54; GCF_013415415.1, s__Actinomyces bowdenii_B, 95.0, 81.19, 0.48; GCF_900637975.1, s__Actinomyces viscosus, 95.0, 81.13, 0.57; GCF_011752065.1, s__Actinomyc…	77.05	11	N/A	N/A
MAG7	concoct.172	concoct.172	d__Bacteria;p__Firmicutes_A;c__Clostridia;o__Lachnospirales;f__Lachnospiraceae;g__Shuttleworthia;s__Shuttleworthia satelles	GCF_000160115.1	95	d__Bacteria;p__Firmicutes_A;c__Clostridia;o__Lachnospirales;f__Lachnospiraceae;g__Shuttleworthia;s__Shuttleworthia satelles	97.96	0.98	GCF_000160115.1	95	d__Bacteria;p__Firmicutes_A;c__Clostridia;o__Lachnospirales;f__Lachnospiraceae;g__Shuttleworthia;s__Shuttleworthia satelles	97.96	0.98	d__Bacteria;p__Firmicutes_A;c__Clostridia;o__Lachnospirales;f__Lachnospiraceae;g__;s__	taxonomic classification defined by topology and ANI	topological placement and ANI have congruent species assignments	N/A	64.85	11	N/A	N/A
MAG8	concoct.177	concoct.177	d__Bacteria;p__Firmicutes_A;c__Clostridia;o__Lachnospirales;f__Lachnospiraceae;g__;s__	N/A	N/A	N/A	N/A	N/A	N/A	N/A	N/A	N/A	N/A	d__Bacteria;p__Firmicutes_A;c__Clostridia;o__Lachnospirales;f__Lachnospiraceae;g__;s__	taxonomic novelty determined using RED	classification based on placement in class-level tree	N/A	84.23	11	0.813497	N/A
MAG9	concoct.178	concoct.178	d__Bacteria;p__Firmicutes_A;c__Clostridia;o__Lachnospirales;f__Lachnospiraceae;g__F0428;s__F0428 sp003043955	GCA_018141845.1	95	d__Bacteria;p__Firmicutes_A;c__Clostridia;o__Lachnospirales;f__Lachnospiraceae;g__F0428;s__F0428 sp003043955	98.75	0.98	GCA_018141845.1	95	d__Bacteria;p__Firmicutes_A;c__Clostridia;o__Lachnospirales;f__Lachnospiraceae;g__F0428;s__F0428 sp003043955	98.75	0.98	d__Bacteria;p__Firmicutes_A;c__Clostridia;o__Lachnospirales;f__Lachnospiraceae;g__;s__	taxonomic classification defined by topology and ANI	topological placement and ANI have congruent species assignments	N/A	85.72	11	N/A	N/A

## Sheet: TableS6
feature	metadata	value	coef	stderr	N	N.not.0	pval	qval	coef_1
Ralstonia_mannitolilytica	Group	Cov	1.74271	0.186095	94	21	5.45e-15	2.31e-12	positive
Ralstonia_pickettii	Group	Cov	1.92505	0.228196	94	24	4.76e-13	1.01e-10	positive
Agrobacterium_tumefaciens	Group1	Healthy	1.54152	0.183868	94	39	5.7e-13	1.16e-10	positive
Sphingobium_yanoikuyae	Group1	Healthy	1.59695	0.193621	94	53	1.1e-12	1.16e-10	positive
Agrobacterium_tumefaciens	Group	LungCancer	-1.60039	0.216524	94	39	6.84e-11	9.66e-09	negative
Sphingobium_yanoikuyae	Group	LungCancer	-1.63993	0.228186	94	53	1.78e-10	1.89e-08	negative
Gemella_sanguinis	Group	Cov	-2.14376	0.301175	94	79	2.46e-10	2.08e-08	negative
Gemella_haemolysans	Group	Cov	-1.78655	0.258593	94	81	6.49e-10	4.58e-08	negative
Methylobacterium_organophilum	Group	Cov	1.02175	0.157259	94	15	4.27e-09	2.59e-07	positive
Agrobacterium_tumefaciens	Group	Cov	-1.46984	0.230337	94	39	7.22e-09	3.32e-07	negative
Corynebacterium_accolens	Group	Cov	-1.84438	0.287849	94	56	6.41e-09	3.32e-07	negative
Sphingobium_yanoikuyae	Group	Cov	-1.54463	0.242743	94	53	7.83e-09	3.32e-07	negative
Corynebacterium_segmentosum	Group	Cov	-1.77907	0.284049	94	58	1.23e-08	4.73e-07	negative
Clostridium_botulinum	Group	Cov	1.35267	0.21753	94	26	1.5e-08	5.3e-07	positive
Corynebacterium_segmentosum	Group1	Healthy	1.44702	0.231111	94	58	1.2e-08	8.49e-07	positive
Corynebacterium_accolens	Group1	Healthy	1.45166	0.235905	94	56	1.95e-08	1.03e-06	positive
Gemella_morbillorum	Group	Cov	-1.69927	0.284063	94	80	4.28e-08	1.4e-06	negative
Candidatus_Nanosynbacter_sp._HMT.352	Group	Cov	-2.01135	0.342133	94	75	6.73e-08	2.04e-06	negative
Selenomonas_sputigena	Group	Cov	-1.23482	0.220033	94	66	2.14e-07	6.05e-06	negative
Yonseivirus_seifer	Group	Cov	0.673947	0.122743	94	10	3.59e-07	9.52e-06	positive
Yonseivirus_soft	Group	Cov	0.670445	0.123136	94	10	4.37e-07	1.09e-05	positive
Rothia_aeria	Group	Cov	-1.44448	0.275255	94	82	9.99e-07	2.35e-05	negative
Haemophilus_influenzae	Group	Cov	-1.40582	0.271126	94	68	1.3e-06	2.89e-05	negative
Corynebacterium_macginleyi	Group1	Healthy	1.18283	0.22447	94	53	8.97e-07	3.8e-05	positive
Corynebacterium_macginleyi	Group	Cov	-1.40972	0.278796	94	53	2.2e-06	4.66e-05	negative
Przondovirus_KP32	Group	Cov	0.556231	0.110959	94	11	2.63e-06	5.31e-05	positive
Cutibacterium_acnes	Group	Cov	-1.08318	0.222509	94	87	4.72e-06	9.09e-05	negative
Haemophilus_parahaemolyticus	Group	Cov	-1.23043	0.254722	94	42	5.48e-06	0.000101111	negative
Haemophilus_haemolyticus	Group	Cov	-1.31891	0.278928	94	57	8.22e-06	0.000145293	negative
Treponema_denticola	Group	Cov	-1.11068	0.235729	94	65	8.79e-06	0.000149046	negative
Olsenella_sp._oral_taxon_807	Group	Cov	-1.34023	0.29339	94	72	1.54e-05	0.000241991	negative
Streptococcus_cristatus	Group	Cov	-1.27721	0.27932	94	82	1.51e-05	0.000241991	negative
Actinomyces_sp._oral_taxon_171	Group	Cov	-0.976632	0.219044	94	69	2.35e-05	0.000351805	negative
Neisseria_mucosa	Group	Cov	-1.37593	0.309037	94	71	2.41e-05	0.000351805	negative
Corynebacterium_segmentosum	Group	LungCancer	-1.17426	0.267014	94	58	2.96e-05	0.00041864	negative
Porphyromonas_endodontalis	Group	Cov	-1.2872	0.296713	94	71	3.71e-05	0.000491572	negative
Treponema_vincentii	Group	Cov	-1.06053	0.244338	94	60	3.68e-05	0.000491572	negative
Neisseria_subflava	Group	Cov	-1.43193	0.332101	94	70	4.1e-05	0.000526572	negative
Candidatus_Nanosynbacter_lyticus	Group	Cov	-1.28115	0.300377	94	62	4.88e-05	0.000608448	negative
Actinomyces_oris	Group	Cov	-1.1781	0.280002	94	77	6.04e-05	0.000732281	negative
Aggregatibacter_sp._2125159857	Group	Cov	-1.01557	0.241916	94	44	6.26e-05	0.000737233	negative
Corynebacterium_accolens	Group	LungCancer	-1.12907	0.270587	94	56	6.87e-05	0.000766848	negative
Corynebacterium_kefirresidentii	Group	LungCancer	-1.04711	0.250654	94	52	6.75e-05	0.000766848	negative
Bacillus_cereus	Group	Cov	0.771555	0.186713	94	16	7.97e-05	0.000844896	positive
Filifactor_alocis	Group	Cov	-1.07261	0.259383	94	63	7.89e-05	0.000844896	negative
Streptococcus_sp._Marseille.Q3533	Group	Cov	-1.09663	0.266262	94	82	8.38e-05	0.00086665	negative
Neisseria_sicca	Group	Cov	-1.18012	0.287948	94	74	9.02e-05	0.000910836	negative
Neisseria_meningitidis	Group	Cov	-1.28703	0.314599	94	58	9.27e-05	0.000913814	negative
Methylobacterium_aquaticum	Group	LungCancer	-0.778948	0.192899	94	49	0.000112265	0.00108183	negative
Candidatus_Minimicrobia_vallesae	Group	Cov	-1.09696	0.274702	94	63	0.000131925	0.00124303	negative
Granulicatella_elegans	Group	Cov	-1.08562	0.272614	94	69	0.000137235	0.00126495	negative
Sphingomonas_melonis	Group	Cov	0.936702	0.237925	94	49	0.000161315	0.00145527	positive
Corynebacterium_kefirresidentii	Group1	Healthy	0.914678	0.213725	94	52	4.58e-05	0.00161854	positive
Arachnia_propionica	Group	Cov	-1.14872	0.296654	94	73	0.000202825	0.00179162	negative
Acinetobacter_pittii	Group	LungCancer	-0.553265	0.144949	94	22	0.000246173	0.00213015	negative
Aggregatibacter_sp._2125159857	Group1	Healthy	0.798225	0.195201	94	44	9.26e-05	0.00219393	positive
Haemophilus_influenzae	Group1	Healthy	0.92504	0.226305	94	68	9.31e-05	0.00219393	positive
Haemophilus_parahaemolyticus	Group1	Healthy	0.858538	0.209574	94	42	9.01e-05	0.00219393	positive
Corynebacterium_macginleyi	Group	LungCancer	-0.996451	0.262077	94	53	0.000259234	0.0021983	negative
Actinomyces_naeslundii	Group	Cov	-0.946466	0.250202	94	72	0.000277249	0.00226065	negative
Neisseria_flavescens	Group	Cov	-1.19463	0.315612	94	67	0.000275025	0.00226065	negative
Parvimonas_micra	Group	Cov	-1.23606	0.327266	94	85	0.000282973	0.00226378	negative
Actinomyces_sp._oral_taxon_169	Group	Cov	-1.02855	0.273992	94	72	0.000306356	0.00238039	negative
Tequatrovirus_kaw	Group	Cov	0.571052	0.152213	94	16	0.000308777	0.00238039	positive
Streptococcus_sanguinis	Group	Cov	-1.0475	0.282331	94	84	0.00035617	0.00269672	negative
Dolosigranulum_pigrum	Group	Cov	-1.21867	0.329005	94	50	0.000363624	0.00270485	negative
Acinetobacter_pittii	Group1	Healthy	0.489702	0.12338	94	22	0.000142899	0.00302946	positive
Candidatus_Nanosynbacter_featherlites	Group	Cov	-0.925587	0.254089	94	59	0.000448126	0.00322043	negative
Corynebacterium_pseudodiphtheriticum	Group	Cov	-1.04904	0.287847	94	41	0.000445616	0.00322043	negative
Actinomyces_sp._oral_taxon_414	Group	Cov	-0.985988	0.272947	94	75	0.000496596	0.00350928	negative
Corynebacterium_pseudodiphtheriticum	Group1	Healthy	0.889244	0.230518	94	41	0.000212239	0.00374956	positive
Ralstonia_mannitolilytica	Group1	Healthy	-0.775102	0.20069	94	21	0.000208831	0.00374956	negative
Acetobacter_aceti	Group	Cov	-0.780494	0.220192	94	83	0.000623169	0.00432331	negative
Actinomyces_sp._HMT_175	Group	Cov	-0.882706	0.249331	94	68	0.000632181	0.00432331	negative
Ralstonia_pickettii	Group1	Healthy	-0.880108	0.233228	94	24	0.000284619	0.00434869	negative
Treponema_denticola	Group1	Healthy	0.735587	0.195064	94	65	0.000287178	0.00434869	positive
Pseudomonas_wenzhouensis	Group	LungCancer	-0.793533	0.224606	94	34	0.000647678	0.00435897	negative
Streptococcus_intermedius	Group	Cov	-0.858205	0.243488	94	73	0.000665927	0.00441177	negative
Haemophilus_parainfluenzae	Group	Cov	-0.999652	0.286478	94	81	0.000748088	0.00487984	negative
Cutibacterium_acnes	Group1	Healthy	0.688574	0.185726	94	87	0.000357556	0.00505346	positive
Aggregatibacter_sp._Marseille.P9115	Group	Cov	-1.05047	0.302656	94	50	0.000795356	0.00510698	negative
Corynebacterium_propinquum	Group	Cov	-1.18041	0.340527	94	44	0.000806999	0.00510698	negative
Mycolicibacter_sp._MYC340	Group	Cov	0.343146	0.100289	94	94	0.000934405	0.00582629	positive
Rheinheimera_mangrovi	Group	Cov	0.588793	0.174318	94	18	0.00107715	0.00661903	positive
Corynebacterium_propinquum	Group1	Healthy	0.984578	0.2728	94	44	0.000499565	0.00661923	positive
Fusobacterium_pseudoperiodonticum	Group	Cov	-1.0872	0.323156	94	70	0.00112458	0.00667451	negative
Lancefieldella_parvula	Group	LungCancer	0.915952	0.272205	94	81	0.00112237	0.00667451	positive
Rothia_dentocariosa	Group	Cov	-0.902902	0.268569	94	82	0.00113341	0.00667451	negative
Campylobacter_rectus	Group	Cov	-0.899112	0.270981	94	68	0.00130461	0.00757748	negative
Actinomyces_sp._oral_taxon_897	Group	Cov	-0.863688	0.26068	94	56	0.00132461	0.00758964	negative
Streptococcus_periodonticum	Group	Cov	-0.969355	0.293018	94	61	0.00134606	0.00760974	negative
Corynebacterium_tuberculostearicum	Group	LungCancer	-0.718364	0.222082	94	62	0.00169805	0.00947333	negative
Dolosigranulum_pigrum	Group1	Healthy	0.923574	0.265462	94	50	0.000770641	0.00961034	positive

## Sheet: TableS7
Name	Fold_Change	P-value	Up/Down
Abiotrophia_defectiva	4.19401	0.967095	No
Acetobacter_aceti	-2.61413	0.0270486	No
Acetobacter_senegalensis	-2.59253	0.0504558	No
Acetobacter_tropicalis	-2.51703	0.0792233	No
Acinetobacter_baumannii	-0.202451	0.344978	No
Acinetobacter_junii	-3.1348	0.00270897	Down
Acinetobacter_pittii	1.99651	0.00682597	Up
Actinomyces_naeslundii	-1.37106	0.000767569	Down
Actinomyces_oris	-1.48812	0.000320032	Down
Actinomyces_pacaensis	1.26424	0.946149	No
Actinomyces_sp._HMT897	-0.914016	0.00179818	No
Actinomyces_sp._HMT_175	-1.29294	0.00036879	Down
Actinomyces_sp._oral_taxon_169	-1.57665	0.000378145	Down
Actinomyces_sp._oral_taxon_171	-2.88248	5.07e-05	Down
Actinomyces_sp._oral_taxon_414	-0.649614	0.00102076	No
Actinomyces_sp._oral_taxon_897	-1.04683	0.000598659	Down
Actinomyces_viscosus	-1.02009	0.00113377	Down
Aeromonas_caviae	-8.93729	0.762547	No
Aeromonas_hydrophila	-0.0447912	0.716189	No
Aggregatibacter_segnis	3.44716	0.00274619	Up
Aggregatibacter_sp._2125159857	0.0416241	9.82e-05	No
Aggregatibacter_sp._Marseille-P9115	1.88234	0.000472794	Up
Aggregatibacter_sp._oral_taxon_513	2.88038	0.00110758	Up
Agrobacterium_tumefaciens	-5.80437	2.81e-06	Down
Arachnia_propionica	-1.12414	0.0003977	Down
Arachnia_rubra	-3.73926	0.00185402	Down
Atopobium_sp._oral_taxon_416	2.58896	0.807054	No
Bacillus_cereus	3.26907	0.00219838	Up
Bacillus_mycoides	#NAME?	0.0439834	No
Bacillus_thuringiensis	-1.35126	0.0293139	No
Bacteroides_heparinolyticus	6.18266	0.0167356	No
Bartonella_krasnovii	-4.43798	0.122325	No
Bifidobacterium_dentium	1.86465	0.994135	No
Brevibacillus_brevis	0.823235	0.00365161	No
Bulleidia_sp._zg-1006	-0.432157	0.0288088	No
Burkholderia_cenocepacia	-0.376748	1	No
Burkholderia_dolosa	-1.47229	0.308914	No
Burkholderia_multivorans	4.41146	0.174435	No
Campylobacter_concisus	0.469054	0.228298	No
Campylobacter_rectus	1.21326	0.00146548	Up
Campylobacter_showae	0.383212	0.0288088	No
Candidatus_Minimicrobia_vallesae	-0.341417	0.000113019	No
Candidatus_Nanosynbacter_featherlites	0.681115	9.36e-05	No
Candidatus_Nanosynbacter_lyticus	0.472917	8.43e-05	No
Candidatus_Nanosynbacter_sp._HMT-352	-0.80643	1.74e-05	No
Capnocytophaga_gingivalis	-1.24177	0.00891719	Down
Capnocytophaga_leadbetteri	0.148038	0.0317497	No
Capnocytophaga_sp._FDAARGOS_737	0.156552	0.0111621	No
Capnocytophaga_sputigena	-1.97669	0.00502849	Down
Clostridioides_difficile	-0.102891	0.167214	No
Clostridium_botulinum	8.00668	4.77e-05	Up
Comamonas_aquatica	3.13323	0.0499031	No
Corynebacterium_accolens	-8.32778	3.33e-07	Down
Corynebacterium_argentoratense	2.25053	0.506391	No
Corynebacterium_kefirresidentii	-2.10639	0.0113301	No
Corynebacterium_macginleyi	-4.08432	2.21e-05	Down
Corynebacterium_propinquum	-7.02691	0.000570396	Down
Corynebacterium_pseudodiphtheriticum	-6.92914	0.000498933	Down
Corynebacterium_resistens	4.62316	0.500685	No
Corynebacterium_segmentosum	-7.97129	5.58e-07	Down
Corynebacterium_simulans	1.74598	0.362816	No
Corynebacterium_striatum	9.0626	0.538192	No
Corynebacterium_tuberculostearicum	1.72709	0.881312	No
Cutibacterium_acnes	-3.28241	0.000124268	Down
Dolosigranulum_pigrum	-8.05231	0.00145387	Down
Eikenella_corrodens	0.00453434	0.632353	No
Enterobacter_hormaechei	3.87476	0.561919	No
Enterococcus_faecalis	-5.9301	0.114641	No
Enterococcus_faecium	1.6738	0.00249856	Up
Escherichia_coli	-1.52453	0.252507	No
Filifactor_alocis	-5.59551	0.000258968	Down
Fusobacterium_hwasookii	-0.766539	0.0559976	No
Fusobacterium_nucleatum	-2.71496	0.0203423	No
Fusobacterium_periodonticum	-1.72233	0.19453	No
Fusobacterium_pseudoperiodonticum	-2.1491	0.00255393	Down
Gemella_haemolysans	-4.71469	5.39e-07	Down
Gemella_morbillorum	-1.83019	4.42e-06	Down
Gemella_sanguinis	-1.99867	3.67e-06	Down
Gemella_sp._oral_taxon_928	0.322744	0.476508	No
Granulicatella_adiacens	0.0912114	0.0413699	No
Granulicatella_elegans	-1.94102	0.000875655	Down
Haemophilus_haemolyticus	-5.30698	3.14e-05	Down
Haemophilus_influenzae	-5.9451	7.11e-06	Down
Haemophilus_parahaemolyticus	-11.7416	4.96e-06	Down
Haemophilus_parainfluenzae	-2.26936	0.00247867	Down
Human_alphaherpesvirus_1	Inf	0.0541239	No
Klebsiella_aerogenes	3.08737	0.746978	No
Klebsiella_oxytoca	11.689	0.484191	No
Klebsiella_pneumoniae	-3.49874	0.968048	No
Klebsiella_variicola	0.640605	0.15479	No
Lacticaseibacillus_paracasei	1.80895	0.919505	No
Lactiplantibacillus_plantarum	-3.37315	0.602133	No
Lactobacillus_delbrueckii	-5.18466	0.924758	No
Lancefieldella_parvula	1.1813	0.88205	No
Lautropia_mirabilis	-0.531285	0.0167207	No
Lentilactobacillus_buchneri	-3.63961	0.0128775	No
Limosilactobacillus_fermentum	5.55237	0.849385	No
Metamycoplasma_salivarium	7.9467	0.495399	No
Methylobacterium_aquaticum	2.49731	0.608791	No
Methylobacterium_organophilum	5.22261	1.92e-07	Up
Micrococcus_luteus	3.56645	0.120268	No
Mogibacterium_diversum	0.865931	0.0249334	No
Mogibacterium_pumilum	-0.298084	0.052919	No
Moraxella_catarrhalis	#NAME?	0.00899691	No
Moraxella_osloensis	0.150394	0.0244594	No
Morococcus_cerebrosus	-2.02106	0.00758783	Down
Mycolicibacter_sp._MYC340	1.37367	3e-05	Up
Neisseria_elongata	-1.24243	0.108807	No
Neisseria_flavescens	-1.64208	0.000320831	Down
Neisseria_lactamica	-2.14651	0.0191564	No
Neisseria_macacae	-1.54556	0.00486979	Down
Neisseria_meningitidis	-1.72171	0.000151463	Down
Neisseria_mucosa	-2.10497	5.54e-05	Down
Neisseria_sicca	-1.48552	0.000291178	Down
Neisseria_subflava	-1.54666	8.06e-05	Down
Olsenella_sp._oral_taxon_807	-0.884523	6.59e-05	No
Olsenella_uli	1.58655	0.0509781	No
Parvimonas_micra	0.452271	0.00649338	No
Pauljensenia_hongkongensis	-0.266004	0.0615149	No
Porphyromonas_endodontalis	-0.0317196	0.000148129	No
Porphyromonas_gingivalis	0.399136	0.0200501	No
Prevotella_intermedia	0.545549	0.00312068	No
Prevotella_jejuni	0.194166	0.139573	No
Prevotella_melaninogenica	-0.452948	0.0292664	No
Prevotella_nigrescens	0.359585	0.111685	No
Prevotella_veroralis	-1.15683	0.0353891	No
Propionibacterium_acidifaciens	-3.11407	0.0112664	No
Przondovirus_KP32	Inf	3.71e-06	No
Pseudoalteromonas_sp._3J6	-8.05891	0.847754	No
Pseudoalteromonas_sp._Scap06	0.331202	0.831174	No
Pseudoalteromonas_sp._Scap25	0.868931	0.447044	No
Pseudomonas_aeruginosa	1.56459	0.320551	No
Pseudomonas_oleovorans	3.58799	0.877315	No
Pseudomonas_sp._phDV1	3.39341	0.719572	No
Pseudomonas_wenzhouensis	3.04196	0.358066	No
Ralstonia_mannitolilytica	10.2147	5.78e-10	Up
Ralstonia_pickettii	6.23661	4.09e-08	Up
Rheinheimera_mangrovi	8.22265	0.00710122	Up
Rothia_aeria	-1.92541	0.000104221	Down
Rothia_dentocariosa	-2.35666	0.00378884	Down
Rothia_mucilaginosa	0.247411	0.075568	No
Salmonella_enterica	0.527523	0.175407	No
Schaalia_cardiffensis	-1.07458	0.00823382	Down
Schaalia_meyeri	1.46569	0.525668	No
Schaalia_odontolytica	1.56633	0.686359	No
Selenomonas_sputigena	-2.88227	1.57e-06	Down
Sphingobium_yanoikuyae	-4.03126	2.16e-06	Down
Sphingomonas_melonis	2.69759	0.0019587	Up
Staphylococcus_aureus	0.602287	0.0284903	No
Staphylococcus_epidermidis	-0.792158	0.110169	No
Streptococcus_agalactiae	0.214572	0.216451	No
Streptococcus_anginosus	-1.76228	0.0265863	No
Streptococcus_australis	0.37758	0.689278	No
Streptococcus_constellatus	-0.493315	0.0215589	No
Streptococcus_cristatus	-2.55718	0.000102496	Down
Streptococcus_dysgalactiae	3.86755	0.186085	No
Streptococcus_gordonii	-0.720397	0.10501	No
Streptococcus_gwangjuense	-0.862228	0.106262	No
Streptococcus_ilei	-0.897817	0.0313727	No
Streptococcus_infantis	0.131914	0.034334	No
Streptococcus_intermedius	-3.04506	0.00150604	Down
Streptococcus_koreensis	-1.14628	0.0191457	No
Streptococcus_lactarius	0.95148	0.455346	No
Streptococcus_milleri	-1.37507	0.00559478	Down
Streptococcus_mitis	-1.31908	0.027259	No
Streptococcus_mutans	-0.479888	0.0180055	No
Streptococcus_oralis	3.22735	0.903544	No
Streptococcus_parasanguinis	-0.184114	0.281388	No
Streptococcus_periodonticum	-1.67703	0.00276397	Down
Streptococcus_pneumoniae	-0.987882	0.182225	No
Streptococcus_pseudopneumoniae	-0.237758	0.0231092	No
Streptococcus_pyogenes	-2.03664	0.0112973	No
Streptococcus_rubneri	-0.701454	0.0950149	No
Streptococcus_salivarius	-0.0927579	0.0113049	No
Streptococcus_sanguinis	-1.53575	0.00193192	Down
Streptococcus_sp._116-D4	-0.855637	0.105302	No
Streptococcus_sp._1643	2.13852	0.858511	No
Streptococcus_sp._A12	0.589541	0.210183	No
Streptococcus_sp._FDAARGOS_192	-0.865637	0.0268236	No
Streptococcus_sp._FDAARGOS_522	1.64287	0.164348	No
Streptococcus_sp._HSISM1	1.45185	0.745781	No
Streptococcus_sp._HSISS1	-0.85312	0.516566	No
Streptococcus_sp._HSISS2	-0.166407	0.231307	No
Streptococcus_sp._HSISS3	0.18591	0.676653	No
Streptococcus_sp._LPB0220	1.54359	0.616865	No
Streptococcus_sp._Marseille-Q3533	-1.75127	0.000815747	Down
Streptococcus_sp._NPS_308	1.58339	0.353184	No
Streptococcus_sp._NSJ-72	-0.586457	0.00467799	No
Streptococcus_sp._oral_taxon_061	-0.893794	0.0241903	No
Streptococcus_sp._oral_taxon_064	3.28597	0.590644	No
Streptococcus_sp._oral_taxon_431	-1.49356	0.0111634	No
Streptococcus_thermophilus	-0.475369	0.15274	No
Streptococcus_vestibularis	0.0717211	0.0359477	No
Streptomyces_sp._ICC1	-7.0817	0.389886	No
Streptomyces_sp._ICC4	-12.4023	0.684713	No
Tannerella_serpentiformis	0.247777	0.069282	No
Tequatrovirus_gee4507	#NAME?	0.138739	No
Tequatrovirus_kaw	11.7201	0.00362966	Up
Treponema_denticola	-2.60035	2.43e-05	Down
Treponema_vincentii	-2.22937	3.29e-05	Down
Tropheryma_whipplei	#NAME?	0.00388363	No
Veillonella_atypica	1.94381	0.418557	No
Veillonella_dispar	2.02276	0.640122	No
Veillonella_nakazawae	2.72058	0.50044	No
Veillonella_parvula	3.79268	0.0464929	No
Veillonella_sp._S12025-13	2.14634	0.364801	No
Vibrio_sp._Scap24	-6.10891	0.588189	No
Xanthobacter_autotrophicus	-6.12446	0.103778	No
Xanthomonas_citri	-0.685362	0.362872	No
Yonseivirus_seifer	Inf	3.71e-06	No
Yonseivirus_soft	Inf	3.71e-06	No
[Haemophilus]_ducreyi	3.70793	0.0247021	No

## Sheet: TableS8
Name	Fold_Change	P-value	Up/Down
Abiotrophia_defectiva	1.73849	0.207585	No
Acetobacter_aceti	-1.67392	0.0605664	No
Acetobacter_senegalensis	-1.65172	0.0396977	No
Acetobacter_tropicalis	-1.63632	0.0932933	No
Acinetobacter_baumannii	-2.14736	0.0358687	No
Acinetobacter_junii	-0.671309	0.0909685	No
Acinetobacter_pittii	-6.39168	0.000782447	Down
Actinomyces_naeslundii	1.42263	0.0979811	No
Actinomyces_oris	2.43813	0.031262	No
Actinomyces_pacaensis	1.76107	0.00126105	Up
Actinomyces_sp._HMT897	0.0134978	0.885508	No
Actinomyces_sp._HMT_175	2.75162	0.0120892	No
Actinomyces_sp._oral_taxon_169	1.78899	0.0956142	No
Actinomyces_sp._oral_taxon_171	1.128	0.224928	No
Actinomyces_sp._oral_taxon_414	1.17635	0.616803	No
Actinomyces_sp._oral_taxon_897	-0.145596	0.64628	No
Actinomyces_viscosus	2.22279	0.0239121	No
Aeromonas_caviae	-0.743789	0.723614	No
Aeromonas_hydrophila	-0.547417	0.0440807	No
Aggregatibacter_segnis	-1.32262	0.212534	No
Aggregatibacter_sp._2125159857	-2.70667	0.0140565	No
Aggregatibacter_sp._Marseille-P9115	-1.45998	0.210861	No
Aggregatibacter_sp._oral_taxon_513	-1.5837	0.113754	No
Agrobacterium_tumefaciens	-8.11396	2.73901e-08	Down
Arachnia_propionica	1.94384	0.70635	No
Arachnia_rubra	-0.668728	0.466702	No
Atopobium_sp._oral_taxon_416	-2.34976	0.751145	No
Bacillus_cereus	-4.14568	0.246679	No
Bacillus_mycoides	-6.05093	0.115223	No
Bacillus_thuringiensis	-0.419512	0.32361	No
Bacteroides_heparinolyticus	-0.306066	0.553515	No
Bartonella_krasnovii	-0.219464	0.167898	No
Bifidobacterium_dentium	-0.770724	0.119871	No
Brevibacillus_brevis	-0.0621119	0.0589747	No
Bulleidia_sp._zg-1006	1.03249	0.0229918	No
Burkholderia_cenocepacia	-0.401822	0.13426	No
Burkholderia_dolosa	-0.444892	0.234085	No
Burkholderia_multivorans	2.33638	0.248555	No
Campylobacter_concisus	-0.247599	0.962446	No
Campylobacter_rectus	-2.08262	0.184573	No
Campylobacter_showae	0.782613	0.533965	No
Candidatus_Minimicrobia_vallesae	1.82024	0.169167	No
Candidatus_Nanosynbacter_featherlites	1.69006	0.34932	No
Candidatus_Nanosynbacter_lyticus	1.35985	0.277222	No
Candidatus_Nanosynbacter_sp._HMT-352	1.79602	0.117611	No
Capnocytophaga_gingivalis	0.52049	0.103708	No
Capnocytophaga_leadbetteri	1.96928	0.0623341	No
Capnocytophaga_sp._FDAARGOS_737	1.92714	0.096189	No
Capnocytophaga_sputigena	0.688402	0.461614	No
Clostridioides_difficile	0.667177	0.22645	No
Clostridium_botulinum	-0.787608	0.685121	No
Comamonas_aquatica	-1.26949	0.314827	No
Corynebacterium_accolens	-4.90434	0.00120712	Down
Corynebacterium_argentoratense	4.07761	0.0117797	No
Corynebacterium_kefirresidentii	-3.99607	0.000534809	Down
Corynebacterium_macginleyi	-4.33051	0.00124757	Down
Corynebacterium_propinquum	-3.98865	0.0128735	No
Corynebacterium_pseudodiphtheriticum	-0.453817	0.00327526	Down
Corynebacterium_resistens	-1.97516	0.946794	No
Corynebacterium_segmentosum	-4.91685	0.000489085	Down
Corynebacterium_simulans	-8.14225	0.0230644	No
Corynebacterium_striatum	-1.28956	0.14918	No
Corynebacterium_tuberculostearicum	-2.71715	0.000654976	Down
Cutibacterium_acnes	-1.30707	0.0525265	No
Dolosigranulum_pigrum	-4.30173	0.106295	No
Eikenella_corrodens	4.06938	0.00781264	Up
Enterobacter_hormaechei	-0.479429	0.128547	No
Enterococcus_faecalis	3.7528	0.499699	No
Enterococcus_faecium	-0.155348	0.171577	No
Escherichia_coli	-0.449872	0.5392	No
Filifactor_alocis	-4.57149	0.365827	No
Fusobacterium_hwasookii	-2.01773	0.892934	No
Fusobacterium_nucleatum	-2.4524	0.49495	No
Fusobacterium_periodonticum	-1.75798	0.312747	No
Fusobacterium_pseudoperiodonticum	-1.74416	0.33105	No
Gemella_haemolysans	-0.468581	0.911002	No
Gemella_morbillorum	0.251264	0.874641	No
Gemella_sanguinis	1.42664	0.0146318	No
Gemella_sp._oral_taxon_928	-0.268654	0.292978	No
Granulicatella_adiacens	1.31958	0.00668423	Up
Granulicatella_elegans	1.09006	0.236167	No
Haemophilus_haemolyticus	-2.00256	0.208608	No
Haemophilus_influenzae	-5.58082	0.0685864	No
Haemophilus_parahaemolyticus	-4.56692	0.0720757	No
Haemophilus_parainfluenzae	-0.20554	0.59239	No
Human_alphaherpesvirus_1	Inf	0.081072	No
Klebsiella_aerogenes	12.2602	0.120252	No
Klebsiella_oxytoca	1.85338	0.865976	No
Klebsiella_pneumoniae	-0.328941	0.429587	No
Klebsiella_variicola	-0.325904	0.106024	No
Lacticaseibacillus_paracasei	-2.80701	0.462114	No
Lactiplantibacillus_plantarum	-3.40164	0.386872	No
Lactobacillus_delbrueckii	-3.87986	0.873506	No
Lancefieldella_parvula	2.4332	0.000195408	Up
Lautropia_mirabilis	0.32409	0.208801	No
Lentilactobacillus_buchneri	-2.44551	0.469011	No
Limosilactobacillus_fermentum	-2.82586	0.527274	No
Metamycoplasma_salivarium	-1.21241	0.179016	No
Methylobacterium_aquaticum	-4.34537	1.53444e-06	Down
Methylobacterium_organophilum	#NAME?	0.436494	No
Micrococcus_luteus	0.130166	0.545089	No
Mogibacterium_diversum	2.11372	0.00123936	Up
Mogibacterium_pumilum	1.27496	0.0554373	No
Moraxella_catarrhalis	0.54404	0.568052	No
Moraxella_osloensis	4.66775	0.133874	No
Morococcus_cerebrosus	0.374825	0.52294	No
Mycolicibacter_sp._MYC340	-0.151106	0.113958	No
Neisseria_elongata	3.84952	0.0581193	No
Neisseria_flavescens	-0.431584	0.250186	No
Neisseria_lactamica	-0.308433	0.355595	No
Neisseria_macacae	-0.384802	0.649938	No
Neisseria_meningitidis	-0.741769	0.514123	No
Neisseria_mucosa	0.210777	0.0460201	No
Neisseria_sicca	-0.36489	0.133402	No
Neisseria_subflava	-0.385391	0.325405	No
Olsenella_sp._oral_taxon_807	1.46301	0.953056	No
Olsenella_uli	0.721367	0.347758	No
Parvimonas_micra	-0.259102	0.747882	No
Pauljensenia_hongkongensis	1.59615	0.13305	No
Porphyromonas_endodontalis	-0.492393	0.487272	No
Porphyromonas_gingivalis	0.514919	0.116225	No
Prevotella_intermedia	0.519588	0.855195	No
Prevotella_jejuni	1.68208	0.0097041	Up
Prevotella_melaninogenica	0.501482	0.0826391	No
Prevotella_nigrescens	0.297952	0.616696	No
Prevotella_veroralis	-0.476297	0.466769	No
Propionibacterium_acidifaciens	-0.24163	0.371088	No
Przondovirus_KP32	Inf	0.226118	No
Pseudoalteromonas_sp._3J6	-0.666087	0.364006	No
Pseudoalteromonas_sp._Scap06	0.0877557	0.51587	No
Pseudoalteromonas_sp._Scap25	-0.272453	0.391121	No
Pseudomonas_aeruginosa	-0.956962	0.744392	No
Pseudomonas_oleovorans	-3.14899	0.0646716	No
Pseudomonas_sp._phDV1	-2.7624	0.0731442	No
Pseudomonas_wenzhouensis	-6.42423	0.000219663	Down
Ralstonia_mannitolilytica	-2.11047	0.839505	No
Ralstonia_pickettii	-3.53862	0.837811	No
Rheinheimera_mangrovi	-2.34647	0.830773	No
Rothia_aeria	0.655312	0.976694	No
Rothia_dentocariosa	0.463128	0.246416	No
Rothia_mucilaginosa	1.07184	0.0176285	No
Salmonella_enterica	-0.537521	0.0540043	No
Schaalia_cardiffensis	-0.0298296	0.741228	No
Schaalia_meyeri	2.0811	0.000732662	Up
Schaalia_odontolytica	2.04634	8.8816e-05	Up
Selenomonas_sputigena	0.440139	0.791015	No
Sphingobium_yanoikuyae	-6.43633	4.4594e-08	Down
Sphingomonas_melonis	-0.981836	0.0399299	No
Staphylococcus_aureus	-0.365297	0.339908	No
Staphylococcus_epidermidis	2.45319	0.0202268	No
Streptococcus_agalactiae	-0.43824	0.81583	No
Streptococcus_anginosus	-0.373148	0.929635	No
Streptococcus_australis	1.47054	0.019742	No
Streptococcus_constellatus	-0.470703	0.736918	No
Streptococcus_cristatus	-1.23718	0.340582	No
Streptococcus_dysgalactiae	-0.249727	0.7219	No
Streptococcus_gordonii	1.9224	0.0911916	No
Streptococcus_gwangjuense	0.00487236	0.28134	No
Streptococcus_ilei	1.33822	0.00448526	Up
Streptococcus_infantis	1.41656	0.00221386	Up
Streptococcus_intermedius	-2.02565	0.584047	No
Streptococcus_koreensis	1.29862	0.00289403	Up
Streptococcus_lactarius	0.571238	0.0571651	No
Streptococcus_milleri	-0.69555	0.776413	No
Streptococcus_mitis	-0.153135	0.48639	No
Streptococcus_mutans	1.94442	0.740648	No
Streptococcus_oralis	0.705236	0.203178	No
Streptococcus_parasanguinis	0.839392	0.0727506	No
Streptococcus_periodonticum	-0.0566682	0.830921	No
Streptococcus_pneumoniae	-0.507425	0.746269	No
Streptococcus_pseudopneumoniae	0.831043	0.702132	No
Streptococcus_pyogenes	0.832989	0.336721	No
Streptococcus_rubneri	1.65064	0.0055699	Up
Streptococcus_salivarius	1.04851	0.179829	No
Streptococcus_sanguinis	0.279223	0.413523	No
Streptococcus_sp._116-D4	0.16695	0.214047	No
Streptococcus_sp._1643	0.594006	0.140689	No
Streptococcus_sp._A12	2.31186	0.00223278	Up
Streptococcus_sp._FDAARGOS_192	0.795506	0.154317	No
Streptococcus_sp._FDAARGOS_522	2.31906	0.0113723	No
Streptococcus_sp._HSISM1	0.954099	0.0132193	No
Streptococcus_sp._HSISS1	0.658044	0.092776	No
Streptococcus_sp._HSISS2	0.894957	0.159819	No
Streptococcus_sp._HSISS3	0.83941	0.175911	No
Streptococcus_sp._LPB0220	0.818018	0.0140947	No
Streptococcus_sp._Marseille-Q3533	0.492111	0.0785843	No
Streptococcus_sp._NPS_308	-0.164288	0.540254	No
Streptococcus_sp._NSJ-72	-0.658988	0.919133	No
Streptococcus_sp._oral_taxon_061	1.14275	0.00853761	Up
Streptococcus_sp._oral_taxon_064	1.37359	0.15921	No
Streptococcus_sp._oral_taxon_431	0.536143	0.159608	No
Streptococcus_thermophilus	0.370279	0.516985	No
Streptococcus_vestibularis	0.0506677	0.920148	No
Streptomyces_sp._ICC1	-0.699939	0.567196	No
Streptomyces_sp._ICC4	-1.86866	0.846679	No
Tannerella_serpentiformis	2.13551	0.119053	No
Tequatrovirus_gee4507	0.78018	0.79789	No
Tequatrovirus_kaw	0.240001	0.59301	No
Treponema_denticola	-2.16981	0.0883421	No
Treponema_vincentii	-1.49158	0.220676	No
Tropheryma_whipplei	-5.2061	0.0507011	No
Veillonella_atypica	1.36501	0.0439368	No
Veillonella_dispar	0.903194	0.0275478	No
Veillonella_nakazawae	1.08656	0.0833963	No
Veillonella_parvula	1.78012	0.250664	No
Veillonella_sp._S12025-13	0.898396	0.044446	No
Vibrio_sp._Scap24	-1.5812	0.430805	No
Xanthobacter_autotrophicus	-0.149806	0.345891	No
Xanthomonas_citri	-0.588745	0.0869694	No
Yonseivirus_seifer	NA	NA	No
Yonseivirus_soft	NA	NA	No
[Haemophilus]_ducreyi	-0.568051	0.0320916	No

## Sheet: TableS9
Name	Fold_Change	P-value	Up/Down
MAG1	-5.2644	0.0557069	No
MAG6	-0.790642	0.000128156	No
MAG8	-4.72648	0.00012669	Down
MAG9	-5.73849	7.78818e-07	Down
MAG12	-1.37078	0.00608565	Down
MAG16	-4.92322	0.574624	No
MAG19	0.849179	0.0990181	No
MAG21	-0.095175	0.419398	No
MAG22	-5.4401	0.0221505	No
MAG24	-4.20181	0.00169941	Down
MAG25	-3.83561	0.00147332	Down
MAG26	-3.39112	0.529873	No
MAG27	-0.0038087	0.241683	No
MAG29	-7.05344	0.00755051	Down
MAG32	-0.91948	0.544444	No
MAG34	0.2993	0.527063	No
MAG35	-8.92004	0.128713	No
MAG38	-3.97453	0.562144	No
MAG39	-3.22061	0.123024	No
MAG40	-2.64111	7.45163e-05	Down
MAG43	-5.827	1.48088e-05	Down
MAG44	0.583702	0.545712	No
MAG45	-7.8243	0.0054801	Down
MAG46	-6.14544	1.23057e-05	Down
MAG51	-5.0165	1.0858e-05	Down
MAG52	-3.97698	0.0092351	Down
MAG53	-3.60952	0.00888558	Down
MAG54	-2.38936	0.000689008	Down
MAG56	-3.09306	0.0063127	Down

[truncated: 1 more sheets: TableS10]
